# Supplementary material for: Functional connectivity of cognition-related brain networks in adults with fetal alcohol syndrome
Source: BMC Med. 2023 Dec 13;21:496. doi: 10.1186/s12916-023-03208-8 (PMC10720228; doi:10.1186/s12916-023-03208-8)
Supplement: Supplementary file 2 — Additional file 2.Detailed naming of regions of interest and order key (overall and within networks) [file 12916_2023_3208_MOESM2_ESM.csv]

overall	within_network	name
1	1	LH_DorsAttnA_TempOcc_1
2	2	LH_DorsAttnA_TempOcc_2
3	3	LH_DorsAttnA_TempOcc_3
4	4	LH_DorsAttnA_TempOcc_4
5	5	LH_DorsAttnA_ParOcc_1
6	6	LH_DorsAttnA_ParOcc_2
7	7	LH_DorsAttnA_SPL_1
8	8	LH_DorsAttnA_SPL_2
9	9	LH_DorsAttnA_SPL_3
10	10	LH_DorsAttnA_SPL_4
11	11	LH_DorsAttnA_SPL_5
12	12	LH_DorsAttnA_SPL_6
13	13	LH_DorsAttnA_SPL_7
14	1	LH_DorsAttnB_PostC_1
15	2	LH_DorsAttnB_PostC_2
16	3	LH_DorsAttnB_PostC_3
17	4	LH_DorsAttnB_PostC_4
18	5	LH_DorsAttnB_PostC_5
19	6	LH_DorsAttnB_PostC_6
20	7	LH_DorsAttnB_PostC_7
21	8	LH_DorsAttnB_PostC_8
22	9	LH_DorsAttnB_PostC_9
23	10	LH_DorsAttnB_FEF_1
24	11	LH_DorsAttnB_FEF_2
25	12	LH_DorsAttnB_FEF_3
26	13	LH_DorsAttnB_PrCv_1
27	1	LH_SalVentAttnA_ParOper_1
28	2	LH_SalVentAttnA_ParOper_2
29	3	LH_SalVentAttnA_ParOper_3
30	4	LH_SalVentAttnA_Ins_1
31	5	LH_SalVentAttnA_Ins_2
32	6	LH_SalVentAttnA_Ins_3
33	7	LH_SalVentAttnA_Ins_4
34	8	LH_SalVentAttnA_FrOper_1
35	9	LH_SalVentAttnA_FrOper_2
36	10	LH_SalVentAttnA_ParMed_1
37	11	LH_SalVentAttnA_ParMed_2
38	12	LH_SalVentAttnA_ParMed_3
39	13	LH_SalVentAttnA_FrMed_1
40	14	LH_SalVentAttnA_FrMed_2
41	15	LH_SalVentAttnA_FrMed_3
42	1	LH_SalVentAttnB_PFCl_1
43	2	LH_SalVentAttnB_PFCl_2
44	3	LH_SalVentAttnB_PFCl_3
45	4	LH_SalVentAttnB_Ins_1
46	5	LH_SalVentAttnB_Ins_2
47	6	LH_SalVentAttnB_Ins_3
48	7	LH_SalVentAttnB_OFC_1
49	8	LH_SalVentAttnB_PFCmp_1
50	1	LH_ContA_Temp_1
51	2	LH_ContA_IPS_1
52	3	LH_ContA_IPS_2
53	4	LH_ContA_IPS_3
54	5	LH_ContA_IPS_4
55	6	LH_ContA_IPS_5
56	7	LH_ContA_PFCd_1
57	8	LH_ContA_PFClv_1
58	9	LH_ContA_PFClv_2
59	10	LH_ContA_PFCl_1
60	11	LH_ContA_PFCl_2
61	12	LH_ContA_PFCl_3
62	13	LH_ContA_Cingm_1
63	1	LH_ContB_Temp_1
64	2	LH_ContB_Temp_2
65	3	LH_ContB_IPL_1
66	4	LH_ContB_IPL_2
67	5	LH_ContB_IPL_3
68	6	LH_ContB_PFCd_1
69	7	LH_ContB_PFClv_1
70	8	LH_ContB_PFClv_2
71	9	LH_ContB_PFClv_3
72	10	LH_ContB_PFCmp_1
73	1	LH_ContC_pCun_1
74	2	LH_ContC_pCun_2
75	3	LH_ContC_pCun_3
76	4	LH_ContC_Cingp_1
77	5	LH_ContC_Cingp_2
78	1	LH_DefaultA_IPL_1
79	2	LH_DefaultA_IPL_2
80	3	LH_DefaultA_PFCd_1
81	4	LH_DefaultA_PFCd_2
82	5	LH_DefaultA_PFCd_3
83	6	LH_DefaultA_pCunPCC_1
84	7	LH_DefaultA_pCunPCC_2
85	8	LH_DefaultA_pCunPCC_3
86	9	LH_DefaultA_pCunPCC_4
87	10	LH_DefaultA_pCunPCC_5
88	11	LH_DefaultA_pCunPCC_6
89	12	LH_DefaultA_pCunPCC_7
90	13	LH_DefaultA_PFCm_1
91	14	LH_DefaultA_PFCm_2
92	15	LH_DefaultA_PFCm_3
93	16	LH_DefaultA_PFCm_4
94	17	LH_DefaultA_PFCm_5
95	18	LH_DefaultA_PFCm_6
96	1	LH_DefaultB_Temp_1
97	2	LH_DefaultB_Temp_2
98	3	LH_DefaultB_Temp_3
99	4	LH_DefaultB_Temp_4
100	5	LH_DefaultB_Temp_5
101	6	LH_DefaultB_Temp_6
102	7	LH_DefaultB_IPL_1
103	8	LH_DefaultB_IPL_2
104	9	LH_DefaultB_PFCd_1
105	10	LH_DefaultB_PFCd_2
106	11	LH_DefaultB_PFCd_3
107	12	LH_DefaultB_PFCd_4
108	13	LH_DefaultB_PFCd_5
109	14	LH_DefaultB_PFCd_6
110	15	LH_DefaultB_PFCl_1
111	16	LH_DefaultB_PFCl_2
112	17	LH_DefaultB_PFCv_1
113	18	LH_DefaultB_PFCv_2
114	19	LH_DefaultB_PFCv_3
115	20	LH_DefaultB_PFCv_4
116	21	LH_DefaultB_PFCv_5
117	1	LH_DefaultC_IPL_1
118	2	LH_DefaultC_Rsp_1
119	3	LH_DefaultC_Rsp_2
120	4	LH_DefaultC_Rsp_3
121	5	LH_DefaultC_PHC_1
122	6	LH_DefaultC_PHC_2
123	7	LH_DefaultC_PHC_3
124	14	RH_DorsAttnA_TempOcc_1
125	15	RH_DorsAttnA_TempOcc_2
126	16	RH_DorsAttnA_TempOcc_3
127	17	RH_DorsAttnA_ParOcc_1
128	18	RH_DorsAttnA_ParOcc_2
129	19	RH_DorsAttnA_ParOcc_3
130	20	RH_DorsAttnA_SPL_1
131	21	RH_DorsAttnA_SPL_2
132	22	RH_DorsAttnA_SPL_3
133	23	RH_DorsAttnA_SPL_4
134	24	RH_DorsAttnA_SPL_5
135	25	RH_DorsAttnA_SPL_6
136	26	RH_DorsAttnA_SPL_7
137	27	RH_DorsAttnA_SPL_8
138	14	RH_DorsAttnB_TempOcc_1
139	15	RH_DorsAttnB_PostC_1
140	16	RH_DorsAttnB_PostC_2
141	17	RH_DorsAttnB_PostC_3
142	18	RH_DorsAttnB_PostC_4
143	19	RH_DorsAttnB_PostC_5
144	20	RH_DorsAttnB_PostC_6
145	21	RH_DorsAttnB_PostC_7
146	22	RH_DorsAttnB_PostC_8
147	23	RH_DorsAttnB_FEF_1
148	24	RH_DorsAttnB_FEF_2
149	25	RH_DorsAttnB_FEF_3
150	16	RH_SalVentAttnA_ParOper_1
151	17	RH_SalVentAttnA_ParOper_2
152	18	RH_SalVentAttnA_ParOper_3
153	19	RH_SalVentAttnA_PrC_1
154	20	RH_SalVentAttnA_Ins_1
155	21	RH_SalVentAttnA_Ins_2
156	22	RH_SalVentAttnA_Ins_3
157	23	RH_SalVentAttnA_Ins_4
158	24	RH_SalVentAttnA_FrOper_1
159	25	RH_SalVentAttnA_FrOper_2
160	26	RH_SalVentAttnA_FrOper_3
161	27	RH_SalVentAttnA_FrMed_1
162	28	RH_SalVentAttnA_ParMed_1
163	29	RH_SalVentAttnA_ParMed_2
164	30	RH_SalVentAttnA_FrMed_2
165	31	RH_SalVentAttnA_ParMed_3
166	32	RH_SalVentAttnA_ParMed_4
167	33	RH_SalVentAttnA_FrMed_3
168	34	RH_SalVentAttnA_FrMed_4
169	9	RH_SalVentAttnB_IPL_1
170	10	RH_SalVentAttnB_PFClv_1
171	11	RH_SalVentAttnB_PFCl_1
172	12	RH_SalVentAttnB_PFCl_2
173	13	RH_SalVentAttnB_PFCl_3
174	14	RH_SalVentAttnB_Ins_1
175	15	RH_SalVentAttnB_Ins_2
176	16	RH_SalVentAttnB_PFCmp_1
177	17	RH_SalVentAttnB_PFCmp_2
178	14	RH_ContA_IPS_1
179	15	RH_ContA_IPS_2
180	16	RH_ContA_IPS_3
181	17	RH_ContA_IPS_4
182	18	RH_ContA_PFCd_1
183	19	RH_ContA_PFCl_1
184	20	RH_ContA_PFCl_2
185	21	RH_ContA_PFCl_3
186	22	RH_ContA_PFCl_4
187	23	RH_ContA_PFCl_5
188	24	RH_ContA_Cingm_1
189	11	RH_ContB_Temp_1
190	12	RH_ContB_Temp_2
191	13	RH_ContB_IPL_1
192	14	RH_ContB_IPL_2
193	15	RH_ContB_IPL_3
194	16	RH_ContB_IPL_4
195	17	RH_ContB_PFCld_1
196	18	RH_ContB_PFCld_2
197	19	RH_ContB_PFCld_3
198	20	RH_ContB_PFCld_4
199	21	RH_ContB_PFClv_1
200	22	RH_ContB_PFClv_2
201	23	RH_ContB_PFClv_3
202	24	RH_ContB_PFClv_4
203	25	RH_ContB_PFCmp_1
204	6	RH_ContC_pCun_1
205	7	RH_ContC_pCun_2
206	8	RH_ContC_pCun_3
207	9	RH_ContC_pCun_4
208	10	RH_ContC_pCun_5
209	11	RH_ContC_Cingp_1
210	12	RH_ContC_Cingp_2
211	19	RH_DefaultA_Temp_1
212	20	RH_DefaultA_IPL_1
213	21	RH_DefaultA_IPL_2
214	22	RH_DefaultA_PFCd_1
215	23	RH_DefaultA_PFCd_2
216	24	RH_DefaultA_pCunPCC_1
217	25	RH_DefaultA_pCunPCC_2
218	26	RH_DefaultA_pCunPCC_3
219	27	RH_DefaultA_pCunPCC_4
220	28	RH_DefaultA_pCunPCC_5
221	29	RH_DefaultA_PFCm_1
222	30	RH_DefaultA_PFCm_2
223	31	RH_DefaultA_PFCm_3
224	32	RH_DefaultA_PFCm_4
225	33	RH_DefaultA_PFCm_5
226	34	RH_DefaultA_PFCm_6
227	22	RH_DefaultB_Temp_1
228	23	RH_DefaultB_Temp_2
229	24	RH_DefaultB_AntTemp_1
230	25	RH_DefaultB_PFCd_1
231	26	RH_DefaultB_PFCd_2
232	27	RH_DefaultB_PFCd_3
233	28	RH_DefaultB_PFCd_4
234	29	RH_DefaultB_PFCd_5
235	30	RH_DefaultB_PFCv_1
236	31	RH_DefaultB_PFCv_2
237	32	RH_DefaultB_PFCv_3
238	8	RH_DefaultC_IPL_1
239	9	RH_DefaultC_IPL_2
240	10	RH_DefaultC_Rsp_1
241	11	RH_DefaultC_Rsp_2
242	12	RH_DefaultC_PHC_1
243	13	RH_DefaultC_PHC_2
