# Supplementary material for: Functional connectivity of cognition-related brain networks in adults with fetal alcohol syndrome
Source: BMC Med. 2023 Dec 13;21:496. doi: 10.1186/s12916-023-03208-8 (PMC10720228; doi:10.1186/s12916-023-03208-8)
Supplement: Supplementary file 4 — Additional file 4.Standardized effect sizes (partial eta2) of static functional connectivity differences as visualized in Figure 1D and ordered identical to additional file 3. [file 12916_2023_3208_MOESM4_ESM.csv]

0	0.0233180854387658	0.0130283506967219	0.00187762395522157	0.00103189605491185	0.0211199181834271	0.0149256830980865	0.0542995270139003	0.0286872262591533	0.0273121360902315	0.0351874841862575	0.0246124552776666	0.0362804875557421	0.00132857629432456	0.00309170619012717	0.00321792900844946	0.00066484487536537	0.0011353138850547	0.0178956575209962	0.000102939113672031	0.0130269113950322	8.23463154171386e-05	0.00921490805162723	0.0178728953334383	0.000487006739969679	0.00782997356264759	0.00219475578326967	0.00820596776672641	0.011106215787448	0.000267189392913741	0.00468084716541362	0.00346170803675179	0.0123337084697046	0.0305045017832896	0.0362353935891634	0.00143530785324925	2.81563194644729e-05	0.00113270824870052	0.00371770129051475	0.00415543126679235	0.00539375669789984	0.00171296017252654	3.80426476385032e-05	0.00979805811134161	0.00621360081149976	0.00245896642474266	0.00109125974070401	0.00235513587019065	0.00471545868835957	0.00121640395483305
0.0233180854387658	0	0.0590384274654687	0.0098700504701541	0.0100391106535446	0.110815412309925	0.0286653692862463	0.050461989715117	0.0748446581940375	0.0709836335836029	0.0628505662028996	0.0897912436922868	0.0646093853927099	0.0100709616043307	0.0272970574062012	0.00877121446763626	0.038883382596698	0.00619299493561334	0.000731621894357315	0.0119736562103793	6.80727444991138e-05	0.00014746760111592	0.0695420489591465	0.00299279783150096	0.00703107859601799	0.0279222930608945	0.00496457114940192	0.00444997125265547	0.000735103255326959	0.000149897747391305	0.00760027019569017	0.0110531815997051	0.00211542921800585	0.0144975771864295	0.00360596762629694	0.0138280175727906	0.0079131064233596	0.000652852316978753	0.0167518308096611	0.0208693948406056	0.00215879726148092	0.0121362062744658	9.10742134598463e-05	0.00175228429669946	0.00715717004468402	0.0288102646147205	0.0173802959388256	0.000443742029913988	0.00115465384639513	0.00612367031112147
0.0130283506967219	0.0590384274654687	0	0.0496238062968832	0.00196258114134182	0.0782264087685537	0.0391635129085826	0.107852687461888	0.0232463123089005	0.0294358038530154	0.0703715779403585	0.0487457322689977	0.0578710005523971	0.00152397141265729	2.28188447664528e-05	0.000804896254167522	0.00305975098680961	0.000330375383476129	0.0261899319197787	0.0247024233327941	0.0299614615333285	0.00366460575673868	0.0206521368991458	0.00347215284980946	0.0141470589216351	0.015683567840987	0.000428508231370967	0.000325653912176402	2.51960559222909e-06	3.42487090834431e-05	0.00272298135753511	0.000155965627020673	0.0011703859085438	0.0111323738317873	0.00193311734619731	0.0282682927680463	0.0142845852405657	0.0159334972394655	0.00452866128693847	0.0127199799913551	0.000794573414430938	5.07047603771984e-05	0.00147673343694867	0.0139597675537896	0.000894358490938109	4.2866544100974e-06	0.001733766010294	0.000742324709690285	0.00125429934366514	0.00293240868888774
0.00187762395522157	0.0098700504701541	0.0496238062968832	0	0.00623448547864454	0.00150629199329545	0.016983202598271	0.00171098361942474	0.000339434006100524	0.00483118933281897	0.000173403514343638	0.00267232773363123	0.00608119551427564	0.00502971566870812	0.00945442787714815	0.00480147019235596	0.0152056087347154	0.0228120247742288	0.00753682104747862	9.25925163743145e-05	0.0206883631083072	0.00025127136085889	6.79673174482966e-05	0.000708164141756154	0.00117551729274881	0.0011308825643653	0.00210405223369383	0.00285891788469199	0.00112229904075346	0.00599443485726709	0.00271234229686597	0.00329703794216979	0.00458234371915786	0.0212551626598712	0.000205834195311844	0.0141840697834642	0.00031522592102138	0.000135059524441746	0.0179801357675905	0.000487405573589352	0.000980175184919558	0.000205310900060684	0.0127446526912958	0.0064240864583921	0.00700335859186241	0.000197571208174657	0.00179061775041357	0.0104871082267535	0.02379253948199	0.00247137312513279
0.00103189605491185	0.0100391106535446	0.00196258114134182	0.00623448547864454	0	0.0308991190605482	0.00393255747247331	0.00339088912633892	3.54678796738836e-08	0.0022040778307908	0.00418962148052552	0.000420141141726624	5.63882467821209e-05	0.023554423770557	0.0255972730356867	0.00159937579014475	0.012372410949831	0.0195935808525051	0.0155269969858247	0.0039125230075935	0.00775375291048579	0.00782152174675629	0.0107204022992984	0.00146061189059056	0.00343839127963073	0.0220624386346695	0.0387707958709458	0.000662233626921224	0.00941450513049728	0.0240527385059014	0.0238656261944334	0.00746636527041445	0.0282728957236618	0.0376397185030685	0.0105609035439642	0.0324108088305579	0.0383832455030924	0.00347553760052782	0.0409303188127823	0.00151691345561786	0.00306441112100551	6.048441656601e-06	0.0115435448023085	0.000297747690184662	0.00582640808411571	0.00204581207761992	0.0108033554125278	0.00118817108593375	0.00521909197798427	0.000219744877437252
0.0211199181834271	0.110815412309925	0.0782264087685537	0.00150629199329545	0.0308991190605482	0	0.0135156311236811	0.0229233958098849	0.0103983712794151	0.0152460346386274	0.000558204773982684	6.9086162601874e-05	0.0504097709053193	0.0281262112429752	0.0584266393335459	5.86720859042968e-05	0.0276306184282477	0.0684231626553625	0.0186024963299233	0.0394595971332511	0.0555392725528499	0.00878214652172425	0.0249865001847844	0.0273064401986885	0.0111108647748944	0.00371154932887421	0.0171890055955074	0.0152094107005827	0.0193187747766565	0.0421707036469554	0.0904451122785783	0.0171458268314046	0.0310606183227898	0.0945662006285268	0.0119307720824942	0.00179196402413056	0.0270120629566406	0.0306819404150307	0.0724589802394607	0.00482877114782986	0.0100542819392446	0.0018619347754571	0.0103328258731574	0.0011569506584801	0.0249824286178047	0.00294054129916281	0.0132428187308888	0.00532836139362988	0.0515720415156107	0.00358949401679343
0.0149256830980865	0.0286653692862463	0.0391635129085826	0.016983202598271	0.00393255747247331	0.0135156311236811	0	0.0019049719953943	8.2549510796923e-05	2.30952646588749e-08	4.09771917981457e-06	0.000518147099359218	0.00135523784413302	0.000220754559877407	0.034653782981903	0.00829086299434297	0.0425103460721362	0.0523184472086212	0.0208654362856397	0.0036164952342745	0.0297290068146699	0.0104344470094604	0.00176720207644538	0.00384112978522823	0.0278743815023395	0.0227792219145166	0.00259552949394241	0.00481001226054108	0.000822281996249146	0.000564441108881833	0.0116963441164827	0.00415857063393994	0.00852489912814757	0.0102396284015584	0.000578731111880063	6.10591537785146e-05	0.002421084326209	0.00123228306297359	0.0373085213703078	0.00283613037977434	0.00549813306080345	0.000329388566601114	0.00182564829381251	0.00947802625746681	0.0250780794402763	0.00010525139054943	0.00027112833682091	0.00722522217010949	0.0227203940514253	0.000447846272996055
0.0542995270139003	0.050461989715117	0.107852687461888	0.00171098361942474	0.00339088912633892	0.0229233958098849	0.0019049719953943	0	0.0205463736012934	0.0291958694896546	0.00381719176246588	0.0130619581043202	0.0558851386895611	0.00518280592873424	0.000279607062664472	0.0324908548920577	1.57321546971548e-05	0.00157972591727133	0.00289098933083624	6.026002863207e-06	0.00186200905111245	0.00482625100169896	0.00685030742657866	0.00142579183218725	0.0016264942035386	0.000167661680545989	0.000728331014347253	0.000268494226876834	0.00733249711513492	0.000545982835628068	0.00448287906080541	0.00883715611495384	0.00832996858879064	0.0073167442398776	0.00369877877806701	0.0193863269242611	0.000265811317856944	0.001056111086573	0.0160588486751579	0.00177261134406977	0.00132003183346244	0.000246305264844499	1.52839553964283e-05	0.00103685185346098	0.0109573692659801	0.00109381844282908	0.00192012640310362	0.00445387834577836	0.010210540709422	0.0314771169101586
0.0286872262591533	0.0748446581940375	0.0232463123089005	0.000339434006100524	3.54678796738836e-08	0.0103983712794151	8.2549510796923e-05	0.0205463736012934	0	0.00832186764871793	0.00500278130999782	0.0141723981259662	0.000263402057039026	0.00109453733233119	0.0024862699319607	0.0187795395599158	0.00740805982960227	2.22549976903518e-05	0.00557894669437533	0.0146422905697004	0.00893339924918531	0.00804229259759547	0.0354423183968377	0.0254314914205152	9.94886915346752e-05	0.0205749818864871	0.0102896827108341	0.00173967422875385	0.0111513948104887	0.000264860479748261	0.00376340076206295	5.92553796058902e-05	1.57423107141716e-05	0.0026206029867505	0.0129024992968549	0.0659952811770347	0.0265940208888787	0.0204308103714028	0.000445032779005209	0.00193825266535787	0.00280487294854298	0.000577691496264645	0.0104287747669757	0.0229513083424179	0.0084523710286665	0.000346013254484875	0.000143818690434098	0.00171936212514916	6.03119154243418e-05	0.0173646858779662
0.0273121360902315	0.0709836335836029	0.0294358038530154	0.00483118933281897	0.0022040778307908	0.0152460346386274	2.30952646588749e-08	0.0291958694896546	0.00832186764871793	0	0.000728550018724695	0.0350233785034961	0.00523516777760865	0.00455175752756265	0.00989182076455503	0.022484984066627	0.0193464897643799	0.00492287684265877	0.00549386728543261	0.00518603505007997	0.00040686210404496	0.000157793148042359	0.00102651142711497	0.00241373886488979	0.0234173362343523	0.0293494889665513	0.0168220171338527	0.000637042135359049	0.026055540272939	0.000938938137498519	0.00283030296177122	8.83317266045486e-06	0.00284085201030659	0.000269669488741848	0.000100835991584183	0.0327731463607853	0.00376714196878247	0.000166056398021284	0.000584026666671136	0.0019714488526317	0.0151101162929577	7.62022877932852e-05	0.000846740702265185	0.00192353002980599	0.0394368021891948	0.00108384220798018	0.00190822640331896	0.00865502420330349	0.0205034337427416	0.0421868048648596
0.0351874841862575	0.0628505662028996	0.0703715779403585	0.000173403514343638	0.00418962148052552	0.000558204773982684	4.09771917981457e-06	0.00381719176246588	0.00500278130999782	0.000728550018724695	0	0.000177692294839723	0.0034255827251416	0.0174544209368643	0.000484889833224949	0.0898443595018325	0.000908346501359845	0.00534810244723501	0.02071184240494	6.99012220547113e-06	0.000165067779860663	0.00031013098968393	0.0014216761243792	0.000505263853344517	0.000897383727474064	0.0200541692377652	0.0289396706932201	4.05906519587583e-05	0.0429350406447345	0.00579227080791663	0.00594898823984437	0.00574058194839057	0.00108163966755239	0.0024909119986949	0.0097702784295701	0.0351039170070452	0.0100886337700379	0.00204032716620812	0.00438516983205428	0.00228682395119532	2.76106615740691e-06	0.000787593946677294	0.00417698709863732	0.000785005114328032	0.0192544220947621	0.00774863108610563	0.000100658275818882	0.000523016272496993	0.00371839945675941	0.0368395680527852
0.0246124552776666	0.0897912436922868	0.0487457322689977	0.00267232773363123	0.000420141141726624	6.9086162601874e-05	0.000518147099359218	0.0130619581043202	0.0141723981259662	0.0350233785034961	0.000177692294839723	0	0.0623353176044456	0.0169958919834636	0.0193408055303536	0.00282273395001816	0.0465207879096304	0.0235919425411047	0.00589480452238403	0.00408537598207618	0.0115040450313503	0.000883995709770966	0.0189252012142333	0.010308338025973	0.00584109229250682	0.0454640883513404	0.00187849172359455	0.00213527275915164	0.00148484685904343	0.0117401512740438	0.00953660785224021	0.0741924600139554	0.0328114577535556	0.0241201730373373	0.00351458059178163	0.0130735779691218	0.00848736466057032	0.00540263420863055	0.0257982481632859	0.00484716954211339	0.00307352983449915	0.0123162179514864	0.0025527867663704	0.0183366149975319	0.0105875489415134	0.0491960512076206	0.0263764215377175	0.000435973304716131	0.0273397783002064	0.00465629078826493
0.0362804875557421	0.0646093853927099	0.0578710005523971	0.00608119551427564	5.63882467821209e-05	0.0504097709053193	0.00135523784413302	0.0558851386895611	0.000263402057039026	0.00523516777760865	0.0034255827251416	0.0623353176044456	0	0.000893536859181564	0.0631761864783607	0.0415557286240266	0.0373250667063985	0.0499091622946591	2.23354945919163e-05	0.00332989035596416	0.00460076046578504	0.00386976392013017	0.0273061752057306	0.00534808730261498	0.000609569932539762	0.0356258488029566	0.0103275195794426	0.0106327021735978	0.0543740268677058	0.000119510275615173	0.000387920852004782	0.00296272486694113	0.00136709360905237	6.68645681956675e-05	0.00998591893964064	0.033664080006358	0.017470494336423	0.0128601302937152	0.000341730566686473	0.0163907831507741	0.000246787845300572	0.000141546816884301	0.00518401705557505	0.00377802505413198	0.00218951707703161	0.00360212354704751	6.2062610309089e-06	0.000680547325669894	0.00425229984317969	0.0280492625838927
0.00132857629432456	0.0100709616043307	0.00152397141265729	0.00502971566870812	0.023554423770557	0.0281262112429752	0.000220754559877407	0.00518280592873424	0.00109453733233119	0.00455175752756265	0.0174544209368643	0.0169958919834636	0.000893536859181564	0	0.0278284369832251	0.0675999091225001	0.00210835196512687	0.000627619538407754	0.0215962944623591	0.0202838973162927	0.00205861241581357	0.0012897895810779	0.00670724026733576	0.00604903233235546	0.00931041034132764	0.00210096871795481	0.0108684837062418	0.00729438483085059	0.0419825770750859	0.0280601323258974	0.0299785712583383	0.028137286397811	8.33883486329699e-05	0.00773823019214189	0.00300768725053138	0.00574434931112925	0.0286014742134527	1.97855774689275e-06	0.0190977424646806	0.0675740596967683	0.00328181483636283	0.00864568141616462	0.0890181270350219	0.0279431687142973	0.0119670928267281	0.0689482704171438	0.0408966837931433	0.000330347943195835	0.0469463654619811	0.0134634672853489
0.00309170619012717	0.0272970574062012	2.28188447664528e-05	0.00945442787714815	0.0255972730356867	0.0584266393335459	0.034653782981903	0.000279607062664472	0.0024862699319607	0.00989182076455503	0.000484889833224949	0.0193408055303536	0.0631761864783607	0.0278284369832251	0	0.075212721948213	0.0013262902178712	0.0157745868638789	0.00326455909258117	0.0220577033756741	0.0167823490399517	0.0117001797904854	0.00094273454157468	0.000475345545451091	0.00387979987244529	0.000940436576705615	0.00632012177923015	0.00889357978106	0.0410142206691616	0.0742160266759219	0.0711099523296138	0.0404756302147633	0.0425056481553001	0.034618545748273	0.0178735290421323	9.21011113693955e-05	0.00993128419606636	0.00907882455266683	0.050023743058594	0.0678153567035931	0.000107921129759507	0.0114231645423638	0.0316746582814585	0.00653375439187418	0.0292542803768639	0.0682021842967947	0.0594657627499386	0.000270965978788742	0.0756723348746407	0.00239439853888793
0.00321792900844946	0.00877121446763626	0.000804896254167522	0.00480147019235596	0.00159937579014475	5.86720859042968e-05	0.00829086299434297	0.0324908548920577	0.0187795395599158	0.022484984066627	0.0898443595018325	0.00282273395001816	0.0415557286240266	0.0675999091225001	0.075212721948213	0	0.0234103119197801	0.0664626002304164	0.0802518119123661	0.0183153647234819	0.0200953325048243	0.000101266839306884	0.00980940972217789	0.0099178524504499	0.0575852748616962	0.0089599953183502	0.0294042385382064	9.76665598780539e-07	2.20742059263967e-07	0.000706406066536635	0.000476191558380065	0.0012547029273998	3.09396029641539e-08	0.000696782042324954	0.00369043504023003	0.000688858793600431	0.0192267227029072	0.00158727927041663	0.0071893292356172	0.0454931759517826	0.0235179770705952	0.00958061663181044	0.0183830405717121	0.00715257534368323	0.00062577535109942	0.000848240500900863	0.00246600323840986	0.0291390560466768	0.00441523850292436	0.00431914521216938
0.00066484487536537	0.038883382596698	0.00305975098680961	0.0152056087347154	0.012372410949831	0.0276306184282477	0.0425103460721362	1.57321546971548e-05	0.00740805982960227	0.0193464897643799	0.000908346501359845	0.0465207879096304	0.0373250667063985	0.00210835196512687	0.0013262902178712	0.0234103119197801	0	0.0155755529880871	0.00572210057655614	0.0430909375076599	0.00940062066161405	0.0110289884313956	0.00340204274041268	0.00457905481157362	0.00592661410498186	0.00928167942654502	0.021009595483996	0.0392945983390206	0.017744190193475	0.0487672210064762	0.0578578408897367	0.0115497581302315	0.0384153167422053	0.0258048031496749	0.000425111734326104	0.00820512509980972	0.0121305903449622	0.0095695462366336	0.0659516173204281	0.053758420078858	0.00131574740516628	0.00686885378945788	0.0580360153492622	0.0234101684163587	0.0235484563685705	0.0265746165749155	0.0507830211132471	0.0084005764064189	0.0675730071927883	0.00627197666430704
0.0011353138850547	0.00619299493561334	0.000330375383476129	0.0228120247742288	0.0195935808525051	0.0684231626553625	0.0523184472086212	0.00157972591727133	2.22549976903518e-05	0.00492287684265877	0.00534810244723501	0.0235919425411047	0.0499091622946591	0.000627619538407754	0.0157745868638789	0.0664626002304164	0.0155755529880871	0	0.0038811552305543	0.021956569783255	0.000910158793648857	0.00977323734772252	0.000684287528628106	0.00317357569865483	0.000714016044445129	0.00558085490623082	0.00946450258875713	0.0171888765339007	0.0181981962832143	0.0274889652828625	0.0369359544435912	0.0112158486708425	0.0214338866130471	0.00969959618007133	0.000950183785827982	0.00670028722530352	0.00500618861994555	0.0139632036582068	0.022377510056637	0.0346795033060406	4.9857416184319e-08	0.00306892057822787	0.0421575156410051	0.0199327420854332	0.0134232495605251	0.0169632176427874	0.0318795328197669	0.00411717772158924	0.0247237226118323	0.00174847553235913
0.0178956575209962	0.000731621894357315	0.0261899319197787	0.00753682104747862	0.0155269969858247	0.0186024963299233	0.0208654362856397	0.00289098933083624	0.00557894669437533	0.00549386728543261	0.02071184240494	0.00589480452238403	2.23354945919163e-05	0.0215962944623591	0.00326455909258117	0.0802518119123661	0.00572210057655614	0.0038811552305543	0	0.000641930933404251	0.000668642904000122	0.0158376856381756	0.016634105491539	0.0532088060376406	0.028785054311152	0.0104498474846003	0.00312241342466096	0.0224302981447085	0.0301416110535588	0.0354239443970659	0.0214183716155816	0.0300636767041213	0.0103162090035327	0.0254038283254368	0.0490566214368855	0.00421348644336747	0.000524108116289971	0.0135877233815858	0.00185326799384687	0.0406661436317641	0.000599128417249704	0.0574752751372879	0.0605758179828329	0.0204941151159875	0.0259343403175507	0.137854057116881	0.0598725456852715	0.0131917086662635	0.0403614004168337	0.017033171816618
0.000102939113672031	0.0119736562103793	0.0247024233327941	9.25925163743145e-05	0.0039125230075935	0.0394595971332511	0.0036164952342745	6.026002863207e-06	0.0146422905697004	0.00518603505007997	6.99012220547113e-06	0.00408537598207618	0.00332989035596416	0.0202838973162927	0.0220577033756741	0.0183153647234819	0.0430909375076599	0.021956569783255	0.000641930933404251	0	0.0012601504045554	0.0261589306189824	0.000165980724845197	0.0431903900544823	0.0366056753055069	0.00639919657232246	0.00300489993789533	0.0062062400395206	0.0122787077751645	0.0134101970851587	0.0122155116129608	0.0511698797926876	0.0361079245118623	0.0269637307687966	0.0461212879103166	0.0065806553225457	0.00693052646305916	0.000245753382806413	0.0478928541397069	0.0169685872963397	0.0223011889637675	0.004854842547739	0.000568245231389413	0.000151275390968536	0.000359115718186312	0.0153354526074023	0.0203658383059667	2.80736421710109e-05	0.0520248896486071	0.00212640095089727
0.0130269113950322	6.80727444991138e-05	0.0299614615333285	0.0206883631083072	0.00775375291048579	0.0555392725528499	0.0297290068146699	0.00186200905111245	0.00893339924918531	0.00040686210404496	0.000165067779860663	0.0115040450313503	0.00460076046578504	0.00205861241581357	0.0167823490399517	0.0200953325048243	0.00940062066161405	0.000910158793648857	0.000668642904000122	0.0012601504045554	0	0.000202478694724216	0.00556872695044383	0.00445845632748381	0.000510098703089873	0.000793519805561077	0.00794438909247658	0.00974255693334544	0.0207947938659965	0.010119233745224	0.0139034892817893	0.00338071321239509	0.00171240899955353	0.00319690566883991	1.86563213394417e-05	0.00326120422800769	5.97535234550587e-05	6.95912377412173e-05	0.00182644318221862	0.0054156578713497	0.0117676963230274	0.0152073991223172	0.0212508362819303	0.0138457633379233	0.00159994235589366	0.0329711056175058	0.00573027720521701	0.00120738670776678	0.000410291451185028	0.0300375315371211
8.23463154171386e-05	0.00014746760111592	0.00366460575673868	0.00025127136085889	0.00782152174675629	0.00878214652172425	0.0104344470094604	0.00482625100169896	0.00804229259759547	0.000157793148042359	0.00031013098968393	0.000883995709770966	0.00386976392013017	0.0012897895810779	0.0117001797904854	0.000101266839306884	0.0110289884313956	0.00977323734772252	0.0158376856381756	0.0261589306189824	0.000202478694724216	0	0.000370245906941001	0.000351867477005913	0.0165713708595589	0.0109202186633679	0.00145988235729124	0.0112283805713222	0.00307321172016376	0.00674675216633469	0.0154464776690993	0.0107447562469929	0.00518896452137726	0.00153967341803794	0.00160214799257737	0.00619856117196886	0.00092980004739215	0.00634441034947726	0.000781054236606619	0.000867330426838873	0.00589037202467551	0.00942413973097736	0.0272480197545794	5.13768152342248e-05	0.0111461486135204	0.030542208497993	0.0108345880132538	3.84219303663275e-06	0.00600820920830189	0.0100410204009217
0.00921490805162723	0.0695420489591465	0.0206521368991458	6.79673174482966e-05	0.0107204022992984	0.0249865001847844	0.00176720207644538	0.00685030742657866	0.0354423183968377	0.00102651142711497	0.0014216761243792	0.0189252012142333	0.0273061752057306	0.00670724026733576	0.00094273454157468	0.00980940972217789	0.00340204274041268	0.000684287528628106	0.016634105491539	0.000165980724845197	0.00556872695044383	0.000370245906941001	0	0.00301697340956148	0.000564092071376496	0.0335285884954222	0.00151306150591294	0.000216397017107541	0.00191373461718018	0.00117434147648912	0.00375442584428003	0.00424017059796601	0.00440439895502945	0.00335689217500473	0.0188098470236576	0.00934532525261025	0.000156036869122756	0.00427876622034729	0.00184363463300502	0.0107705783428422	0.0249538818678685	0.00797668560347073	0.046425275509027	0.0229623349844667	0.0381786265785864	0.000338013346572087	0.00898107995827371	0.0019249924808126	0.0198399743895814	0.0413523670712379
0.0178728953334383	0.00299279783150096	0.00347215284980946	0.000708164141756154	0.00146061189059056	0.0273064401986885	0.00384112978522823	0.00142579183218725	0.0254314914205152	0.00241373886488979	0.000505263853344517	0.010308338025973	0.00534808730261498	0.00604903233235546	0.000475345545451091	0.0099178524504499	0.00457905481157362	0.00317357569865483	0.0532088060376406	0.0431903900544823	0.00445845632748381	0.000351867477005913	0.00301697340956148	0	0.00562665121508106	0.000524670835422842	0.0228362142324476	0.0136714265149187	0.00699728284217714	0.00641893412569829	0.000569806622223659	0.00922087507945134	0.000281672690248047	0.00359049213833168	0.000349365559367036	0.0174843341260618	0.0111168498631615	0.012292407111287	0.00227259080298956	0.000394347195672989	0.000611613667581854	0.011973466480625	0.00606391637717081	0.0147010511426074	7.10527714329705e-05	0.0115606231911917	0.00102103431323891	0.00379084599168375	0.000893643789413531	6.93028649252128e-05
0.000487006739969679	0.00703107859601799	0.0141470589216351	0.00117551729274881	0.00343839127963073	0.0111108647748944	0.0278743815023395	0.0016264942035386	9.94886915346752e-05	0.0234173362343523	0.000897383727474064	0.00584109229250682	0.000609569932539762	0.00931041034132764	0.00387979987244529	0.0575852748616962	0.00592661410498186	0.000714016044445129	0.028785054311152	0.0366056753055069	0.000510098703089873	0.0165713708595589	0.000564092071376496	0.00562665121508106	0	0.0149273755384365	0.00858669891264088	0.0177484787786863	0.0182150485782994	0.000137772241241268	0.000845250366191944	0.0151361962145039	0.00034103022279791	0.00394505714621072	0.00180796397297039	0.00802367396803014	0.000699344799063542	0.0227152701928279	0.00523065489664405	0.000144898165790409	0.0166941495086358	0.00667312105152224	0.00894705052662406	0.0240693486626709	0.00192460221235035	0.00148289985291224	0.00191818486075101	0.000899013253799418	0.00591692491076589	0.00102707812744603
0.00782997356264759	0.0279222930608945	0.015683567840987	0.0011308825643653	0.0220624386346695	0.00371154932887421	0.0227792219145166	0.000167661680545989	0.0205749818864871	0.0293494889665513	0.0200541692377652	0.0454640883513404	0.0356258488029566	0.00210096871795481	0.000940436576705615	0.0089599953183502	0.00928167942654502	0.00558085490623082	0.0104498474846003	0.00639919657232246	0.000793519805561077	0.0109202186633679	0.0335285884954222	0.000524670835422842	0.0149273755384365	0	0.0391348047841386	0.00164519853617229	0.000924519145552278	0.000984005035379142	0.0177911500691379	0.00962805015213038	0.000388571927429198	0.0125830526910415	0.00019736461480091	0.00848697185036093	5.95933996961591e-05	0.00866796594521149	0.000520686155092752	0.000131537089601163	0.000352093529191778	0.00020963627676506	0.00227131525195309	0.00354332364608796	0.00126238771720943	0.0517783008626535	0.0192981736675325	6.55150565253559e-05	0.000622669234207526	0.000264687893641223
0.00219475578326967	0.00496457114940192	0.000428508231370967	0.00210405223369383	0.0387707958709458	0.0171890055955074	0.00259552949394241	0.000728331014347253	0.0102896827108341	0.0168220171338527	0.0289396706932201	0.00187849172359455	0.0103275195794426	0.0108684837062418	0.00632012177923015	0.0294042385382064	0.021009595483996	0.00946450258875713	0.00312241342466096	0.00300489993789533	0.00794438909247658	0.00145988235729124	0.00151306150591294	0.0228362142324476	0.00858669891264088	0.0391348047841386	0	0.0325429284737838	0.0455950219476318	0.00439557037098773	0.0123865154287247	0.0492092956981676	0.00101762059870106	3.37500300014491e-05	0.00207820616990451	0.0122809254655826	0.00208481118489059	0.00139519349953762	4.12462837389175e-06	0.0452971500670382	0.0110930585903864	0.0383477638647749	0.0729132995524805	0.0417238143669696	0.031480031661531	0.140422357823015	0.0940992828360998	0.0116243310252227	0.0446919824301373	9.1166631979348e-05
0.00820596776672641	0.00444997125265547	0.000325653912176402	0.00285891788469199	0.000662233626921224	0.0152094107005827	0.00481001226054108	0.000268494226876834	0.00173967422875385	0.000637042135359049	4.05906519587583e-05	0.00213527275915164	0.0106327021735978	0.00729438483085059	0.00889357978106	9.76665598780539e-07	0.0392945983390206	0.0171888765339007	0.0224302981447085	0.0062062400395206	0.00974255693334544	0.0112283805713222	0.000216397017107541	0.0136714265149187	0.0177484787786863	0.00164519853617229	0.0325429284737838	0	0.00303539262725428	0.00097609041715097	0.000210546312646629	0.00971965720739922	0.00112762279275609	1.21000357536055e-06	0.0221882488360942	0.00651427362975373	0.0269285894624959	0.00569042232982202	0.00469876547359635	0.00894104766823639	0.000462107326629556	0.00386791364007123	0.000164669149286903	0.00309776129297937	0.00247617359523722	0.0273330543631435	0.0201876256631406	0.0151523372876405	0.00269099977197136	0.00225241243883789
0.011106215787448	0.000735103255326959	2.51960559222909e-06	0.00112229904075346	0.00941450513049728	0.0193187747766565	0.000822281996249146	0.00733249711513492	0.0111513948104887	0.026055540272939	0.0429350406447345	0.00148484685904343	0.0543740268677058	0.0419825770750859	0.0410142206691616	2.20742059263967e-07	0.017744190193475	0.0181981962832143	0.0301416110535588	0.0122787077751645	0.0207947938659965	0.00307321172016376	0.00191373461718018	0.00699728284217714	0.0182150485782994	0.000924519145552278	0.0455950219476318	0.00303539262725428	0	0.0158754946462223	0.00758397883050003	1.32361996356087e-05	0.0275778209095238	0.00550819147644074	0.0436793840350949	0.00163754578223576	0.0107459368945466	0.000283132797962172	0.000253930144659036	0.00758481762907668	0.0361187178043385	0.000339082278117407	0.0286878628079433	0.00662732051243847	1.94827218289599e-05	0.0113285495903574	0.000191492116702883	0.000272290095925338	0.00118810475086287	0.000466966326448166
0.000267189392913741	0.000149897747391305	3.42487090834431e-05	0.00599443485726709	0.0240527385059014	0.0421707036469554	0.000564441108881833	0.000545982835628068	0.000264860479748261	0.000938938137498519	0.00579227080791663	0.0117401512740438	0.000119510275615173	0.0280601323258974	0.0742160266759219	0.000706406066536635	0.0487672210064762	0.0274889652828625	0.0354239443970659	0.0134101970851587	0.010119233745224	0.00674675216633469	0.00117434147648912	0.00641893412569829	0.000137772241241268	0.000984005035379142	0.00439557037098773	0.00097609041715097	0.0158754946462223	0	0.00613062875872184	4.12285667243123e-05	0.00218717102218131	0.00814086021844676	0.0212566979360744	0.00501208133409558	0.035306540215402	0.0215104466313472	0.0198377598224058	0.0423530148519805	0.0326549096092411	0.000400463198910301	0.0146515536398083	0.023044759409446	0.010497848129909	0.0157343199346808	0.00680143778406482	0.00326717022277017	0.00777518330260392	0.0266385601365133
0.00468084716541362	0.00760027019569017	0.00272298135753511	0.00271234229686597	0.0238656261944334	0.0904451122785783	0.0116963441164827	0.00448287906080541	0.00376340076206295	0.00283030296177122	0.00594898823984437	0.00953660785224021	0.000387920852004782	0.0299785712583383	0.0711099523296138	0.000476191558380065	0.0578578408897367	0.0369359544435912	0.0214183716155816	0.0122155116129608	0.0139034892817893	0.0154464776690993	0.00375442584428003	0.000569806622223659	0.000845250366191944	0.0177911500691379	0.0123865154287247	0.000210546312646629	0.00758397883050003	0.00613062875872184	0	0.00227332707161001	0.00949167264488261	0.016269854934182	0.0228717169880743	0.0176513274692421	0.0231202921128986	0.0249933508281455	0.00106536733060833	0.0113906223985386	0.0656184700084187	0.00259336772117703	0.0286491493410237	0.0259087551569205	0.0109574322366618	0.0357398428311862	0.00327459045418124	5.08151780744832e-07	0.0160517313474377	0.00409792970872211
0.00346170803675179	0.0110531815997051	0.000155965627020673	0.00329703794216979	0.00746636527041445	0.0171458268314046	0.00415857063393994	0.00883715611495384	5.92553796058902e-05	8.83317266045486e-06	0.00574058194839057	0.0741924600139554	0.00296272486694113	0.028137286397811	0.0404756302147633	0.0012547029273998	0.0115497581302315	0.0112158486708425	0.0300636767041213	0.0511698797926876	0.00338071321239509	0.0107447562469929	0.00424017059796601	0.00922087507945134	0.0151361962145039	0.00962805015213038	0.0492092956981676	0.00971965720739922	1.32361996356087e-05	4.12285667243123e-05	0.00227332707161001	0	0.00832973634130173	0.0354267703608982	0.0051491893266922	0.0225348267649342	0.0578206752335545	0.0282499504592934	0.0450755583977723	0.0156203230985063	0.00955415912056804	0.00725260414876063	0.00444011639051882	0.00282490740482909	0.00337253319888208	0.0451629295110913	0.00116733791384561	1.05180160203123e-06	0.00683197082213395	6.88122988342507e-05
0.0123337084697046	0.00211542921800585	0.0011703859085438	0.00458234371915786	0.0282728957236618	0.0310606183227898	0.00852489912814757	0.00832996858879064	1.57423107141716e-05	0.00284085201030659	0.00108163966755239	0.0328114577535556	0.00136709360905237	8.33883486329699e-05	0.0425056481553001	3.09396029641539e-08	0.0384153167422053	0.0214338866130471	0.0103162090035327	0.0361079245118623	0.00171240899955353	0.00518896452137726	0.00440439895502945	0.000281672690248047	0.00034103022279791	0.000388571927429198	0.00101762059870106	0.00112762279275609	0.0275778209095238	0.00218717102218131	0.00949167264488261	0.00832973634130173	0	1.95908859500227e-05	0.0382598009586755	0.0473179455021729	0.063812448893695	0.0577912782899449	0.0129888864236239	0.0177266348044198	0.0555517739397429	0.00708271005990742	0.0528623849390367	0.0106956634536211	0.00240438298978105	0.0482886235673817	0.0329041889032379	0.00141130039343223	0.0252309964562002	0.0241152667885014
0.0305045017832896	0.0144975771864295	0.0111323738317873	0.0212551626598712	0.0376397185030685	0.0945662006285268	0.0102396284015584	0.0073167442398776	0.0026206029867505	0.000269669488741848	0.0024909119986949	0.0241201730373373	6.68645681956675e-05	0.00773823019214189	0.034618545748273	0.000696782042324954	0.0258048031496749	0.00969959618007133	0.0254038283254368	0.0269637307687966	0.00319690566883991	0.00153967341803794	0.00335689217500473	0.00359049213833168	0.00394505714621072	0.0125830526910415	3.37500300014491e-05	1.21000357536055e-06	0.00550819147644074	0.00814086021844676	0.016269854934182	0.0354267703608982	1.95908859500227e-05	0	0.0144876542563731	0.0470040326932703	0.0923270449686422	0.0544427258671126	0.00165947876976667	0.0256049694773554	0.0596179272996295	0.0223588217073023	0.0128653557778709	0.0080863537344744	0.0406177135324357	0.0774513284273654	0.0364666545308698	7.62464136569287e-05	0.0473436727683052	0.034913926759895
0.0362353935891634	0.00360596762629694	0.00193311734619731	0.000205834195311844	0.0105609035439642	0.0119307720824942	0.000578731111880063	0.00369877877806701	0.0129024992968549	0.000100835991584183	0.0097702784295701	0.00351458059178163	0.00998591893964064	0.00300768725053138	0.0178735290421323	0.00369043504023003	0.000425111734326104	0.000950183785827982	0.0490566214368855	0.0461212879103166	1.86563213394417e-05	0.00160214799257737	0.0188098470236576	0.000349365559367036	0.00180796397297039	0.00019736461480091	0.00207820616990451	0.0221882488360942	0.0436793840350949	0.0212566979360744	0.0228717169880743	0.0051491893266922	0.0382598009586755	0.0144876542563731	0	0.00191270311202368	0.0105149775286684	0.0576421700736162	0.00652878146544287	0.00719274892738359	0.013948354613727	0.00071258813765905	0.00172680958852196	0.000225815564795285	0.00229866061039505	0.0241370405062578	0.000668038964062769	0.00319105248419617	0.000269793030713496	0.00488664148674182
0.00143530785324925	0.0138280175727906	0.0282682927680463	0.0141840697834642	0.0324108088305579	0.00179196402413056	6.10591537785146e-05	0.0193863269242611	0.0659952811770347	0.0327731463607853	0.0351039170070452	0.0130735779691218	0.033664080006358	0.00574434931112925	9.21011113693955e-05	0.000688858793600431	0.00820512509980972	0.00670028722530352	0.00421348644336747	0.0065806553225457	0.00326120422800769	0.00619856117196886	0.00934532525261025	0.0174843341260618	0.00802367396803014	0.00848697185036093	0.0122809254655826	0.00651427362975373	0.00163754578223576	0.00501208133409558	0.0176513274692421	0.0225348267649342	0.0473179455021729	0.0470040326932703	0.00191270311202368	0	0.00927256976431124	0.00811603873766686	0.0213186727314081	0.000494635418997915	0.0574291209240205	0.00048459778494736	0.0095232894749779	0.00497350235740662	0.00658733587044942	0.00228865272018368	0.0129979823295003	0.000135977004846729	5.74719842701291e-05	0.000886332221509586
2.81563194644729e-05	0.0079131064233596	0.0142845852405657	0.00031522592102138	0.0383832455030924	0.0270120629566406	0.002421084326209	0.000265811317856944	0.0265940208888787	0.00376714196878247	0.0100886337700379	0.00848736466057032	0.017470494336423	0.0286014742134527	0.00993128419606636	0.0192267227029072	0.0121305903449622	0.00500618861994555	0.000524108116289971	0.00693052646305916	5.97535234550587e-05	0.00092980004739215	0.000156036869122756	0.0111168498631615	0.000699344799063542	5.95933996961591e-05	0.00208481118489059	0.0269285894624959	0.0107459368945466	0.035306540215402	0.0231202921128986	0.0578206752335545	0.063812448893695	0.0923270449686422	0.0105149775286684	0.00927256976431124	0	0.000898073695669265	0.0407655214912843	0.0024840023879928	0.0521265715172956	0.000416048286897658	0.000679068610687983	0.00430086496369642	0.0133519084199611	0.0167893192552762	0.0290031079180835	0.00205814705285306	0.0207139252152817	0.0269557172704669
0.00113270824870052	0.000652852316978753	0.0159334972394655	0.000135059524441746	0.00347553760052782	0.0306819404150307	0.00123228306297359	0.001056111086573	0.0204308103714028	0.000166056398021284	0.00204032716620812	0.00540263420863055	0.0128601302937152	1.97855774689275e-06	0.00907882455266683	0.00158727927041663	0.0095695462366336	0.0139632036582068	0.0135877233815858	0.000245753382806413	6.95912377412173e-05	0.00634441034947726	0.00427876622034729	0.012292407111287	0.0227152701928279	0.00866796594521149	0.00139519349953762	0.00569042232982202	0.000283132797962172	0.0215104466313472	0.0249933508281455	0.0282499504592934	0.0577912782899449	0.0544427258671126	0.0576421700736162	0.00811603873766686	0.000898073695669265	0	0.0585312336626118	0.00445772603271239	0.0668803985146366	0.0116190679663606	0.00110921039528256	5.00646532369428e-05	0.0111699178198989	0.0150502141260678	0.0203957939978987	6.61862338209335e-05	0.0305858758445251	0.00630694851493856
0.00371770129051475	0.0167518308096611	0.00452866128693847	0.0179801357675905	0.0409303188127823	0.0724589802394607	0.0373085213703078	0.0160588486751579	0.000445032779005209	0.000584026666671136	0.00438516983205428	0.0257982481632859	0.000341730566686473	0.0190977424646806	0.050023743058594	0.0071893292356172	0.0659516173204281	0.022377510056637	0.00185326799384687	0.0478928541397069	0.00182644318221862	0.000781054236606619	0.00184363463300502	0.00227259080298956	0.00523065489664405	0.000520686155092752	4.12462837389175e-06	0.00469876547359635	0.000253930144659036	0.0198377598224058	0.00106536733060833	0.0450755583977723	0.0129888864236239	0.00165947876976667	0.00652878146544287	0.0213186727314081	0.0407655214912843	0.0585312336626118	0	0.0705986128968317	0.0498106608259005	0.0123229047430174	0.0544547707413159	0.00328287825025951	0.01991771105935	0.0503899330680891	0.0570605727932233	0.00843052987577447	0.0742859806735321	0.00354564149529698
0.00415543126679235	0.0208693948406056	0.0127199799913551	0.000487405573589352	0.00151691345561786	0.00482877114782986	0.00283613037977434	0.00177261134406977	0.00193825266535787	0.0019714488526317	0.00228682395119532	0.00484716954211339	0.0163907831507741	0.0675740596967683	0.0678153567035931	0.0454931759517826	0.053758420078858	0.0346795033060406	0.0406661436317641	0.0169685872963397	0.0054156578713497	0.000867330426838873	0.0107705783428422	0.000394347195672989	0.000144898165790409	0.000131537089601163	0.0452971500670382	0.00894104766823639	0.00758481762907668	0.0423530148519805	0.0113906223985386	0.0156203230985063	0.0177266348044198	0.0256049694773554	0.00719274892738359	0.000494635418997915	0.0024840023879928	0.00445772603271239	0.0705986128968317	0	0.000504073413187109	0.000236363572497626	0.0152930085434984	4.62850519414097e-06	6.6144339726526e-05	0.0120468079569224	0.0187719491239611	0.00733366242173218	0.00804318193881995	0.0210256286099479
0.00539375669789984	0.00215879726148092	0.000794573414430938	0.000980175184919558	0.00306441112100551	0.0100542819392446	0.00549813306080345	0.00132003183346244	0.00280487294854298	0.0151101162929577	2.76106615740691e-06	0.00307352983449915	0.000246787845300572	0.00328181483636283	0.000107921129759507	0.0235179770705952	0.00131574740516628	4.9857416184319e-08	0.000599128417249704	0.0223011889637675	0.0117676963230274	0.00589037202467551	0.0249538818678685	0.000611613667581854	0.0166941495086358	0.000352093529191778	0.0110930585903864	0.000462107326629556	0.0361187178043385	0.0326549096092411	0.0656184700084187	0.00955415912056804	0.0555517739397429	0.0596179272996295	0.013948354613727	0.0574291209240205	0.0521265715172956	0.0668803985146366	0.0498106608259005	0.000504073413187109	0	0.00623451985459092	0.0225175760145778	0.00377667492547974	0.0408579502902385	0.0365956782137443	0.000173867639825784	0.00159876536147947	0.000803717612641903	0.000425051689086156
0.00171296017252654	0.0121362062744658	5.07047603771984e-05	0.000205310900060684	6.048441656601e-06	0.0018619347754571	0.000329388566601114	0.000246305264844499	0.000577691496264645	7.62022877932852e-05	0.000787593946677294	0.0123162179514864	0.000141546816884301	0.00864568141616462	0.0114231645423638	0.00958061663181044	0.00686885378945788	0.00306892057822787	0.0574752751372879	0.004854842547739	0.0152073991223172	0.00942413973097736	0.00797668560347073	0.011973466480625	0.00667312105152224	0.00020963627676506	0.0383477638647749	0.00386791364007123	0.000339082278117407	0.000400463198910301	0.00259336772117703	0.00725260414876063	0.00708271005990742	0.0223588217073023	0.00071258813765905	0.00048459778494736	0.000416048286897658	0.0116190679663606	0.0123229047430174	0.000236363572497626	0.00623451985459092	0	0.000357757273355913	6.85729960890326e-07	0.00244824578285916	0.0112502791076217	0.00220155445053134	0.0010225437334304	0.0037563765291614	0.00344371569752044
3.80426476385032e-05	9.10742134598463e-05	0.00147673343694867	0.0127446526912958	0.0115435448023085	0.0103328258731574	0.00182564829381251	1.52839553964283e-05	0.0104287747669757	0.000846740702265185	0.00417698709863732	0.0025527867663704	0.00518401705557505	0.0890181270350219	0.0316746582814585	0.0183830405717121	0.0580360153492622	0.0421575156410051	0.0605758179828329	0.000568245231389413	0.0212508362819303	0.0272480197545794	0.046425275509027	0.00606391637717081	0.00894705052662406	0.00227131525195309	0.0729132995524805	0.000164669149286903	0.0286878628079433	0.0146515536398083	0.0286491493410237	0.00444011639051882	0.0528623849390367	0.0128653557778709	0.00172680958852196	0.0095232894749779	0.000679068610687983	0.00110921039528256	0.0544547707413159	0.0152930085434984	0.0225175760145778	0.000357757273355913	0	0.0029818565982479	3.90734143267142e-05	0.00295676093594619	5.25427674183474e-06	0.000144401340650609	6.53848859306735e-06	0.0336919167159479
0.00979805811134161	0.00175228429669946	0.0139597675537896	0.0064240864583921	0.000297747690184662	0.0011569506584801	0.00947802625746681	0.00103685185346098	0.0229513083424179	0.00192353002980599	0.000785005114328032	0.0183366149975319	0.00377802505413198	0.0279431687142973	0.00653375439187418	0.00715257534368323	0.0234101684163587	0.0199327420854332	0.0204941151159875	0.000151275390968536	0.0138457633379233	5.13768152342248e-05	0.0229623349844667	0.0147010511426074	0.0240693486626709	0.00354332364608796	0.0417238143669696	0.00309776129297937	0.00662732051243847	0.023044759409446	0.0259087551569205	0.00282490740482909	0.0106956634536211	0.0080863537344744	0.000225815564795285	0.00497350235740662	0.00430086496369642	5.00646532369428e-05	0.00328287825025951	4.62850519414097e-06	0.00377667492547974	6.85729960890326e-07	0.0029818565982479	0	0.000660820674639219	4.5677518193917e-05	0.00138988634847617	0.00571775919012423	0.00165878775238891	0.0259420038210455
0.00621360081149976	0.00715717004468402	0.000894358490938109	0.00700335859186241	0.00582640808411571	0.0249824286178047	0.0250780794402763	0.0109573692659801	0.0084523710286665	0.0394368021891948	0.0192544220947621	0.0105875489415134	0.00218951707703161	0.0119670928267281	0.0292542803768639	0.00062577535109942	0.0235484563685705	0.0134232495605251	0.0259343403175507	0.000359115718186312	0.00159994235589366	0.0111461486135204	0.0381786265785864	7.10527714329705e-05	0.00192460221235035	0.00126238771720943	0.031480031661531	0.00247617359523722	1.94827218289599e-05	0.010497848129909	0.0109574322366618	0.00337253319888208	0.00240438298978105	0.0406177135324357	0.00229866061039505	0.00658733587044942	0.0133519084199611	0.0111699178198989	0.01991771105935	6.6144339726526e-05	0.0408579502902385	0.00244824578285916	3.90734143267142e-05	0.000660820674639219	0	0.014274735611175	0.0060450185356019	0.000250761757216804	0.00320709643226716	0.00147571671422464
0.00245896642474266	0.0288102646147205	4.2866544100974e-06	0.000197571208174657	0.00204581207761992	0.00294054129916281	0.00010525139054943	0.00109381844282908	0.000346013254484875	0.00108384220798018	0.00774863108610563	0.0491960512076206	0.00360212354704751	0.0689482704171438	0.0682021842967947	0.000848240500900863	0.0265746165749155	0.0169632176427874	0.137854057116881	0.0153354526074023	0.0329711056175058	0.030542208497993	0.000338013346572087	0.0115606231911917	0.00148289985291224	0.0517783008626535	0.140422357823015	0.0273330543631435	0.0113285495903574	0.0157343199346808	0.0357398428311862	0.0451629295110913	0.0482886235673817	0.0774513284273654	0.0241370405062578	0.00228865272018368	0.0167893192552762	0.0150502141260678	0.0503899330680891	0.0120468079569224	0.0365956782137443	0.0112502791076217	0.00295676093594619	4.5677518193917e-05	0.014274735611175	0	0.0143602737777662	0.00151500843820201	4.59427920951248e-05	0.000167482333396774
0.00109125974070401	0.0173802959388256	0.001733766010294	0.00179061775041357	0.0108033554125278	0.0132428187308888	0.00027112833682091	0.00192012640310362	0.000143818690434098	0.00190822640331896	0.000100658275818882	0.0263764215377175	6.2062610309089e-06	0.0408966837931433	0.0594657627499386	0.00246600323840986	0.0507830211132471	0.0318795328197669	0.0598725456852715	0.0203658383059667	0.00573027720521701	0.0108345880132538	0.00898107995827371	0.00102103431323891	0.00191818486075101	0.0192981736675325	0.0940992828360998	0.0201876256631406	0.000191492116702883	0.00680143778406482	0.00327459045418124	0.00116733791384561	0.0329041889032379	0.0364666545308698	0.000668038964062769	0.0129979823295003	0.0290031079180835	0.0203957939978987	0.0570605727932233	0.0187719491239611	0.000173867639825784	0.00220155445053134	5.25427674183474e-06	0.00138988634847617	0.0060450185356019	0.0143602737777662	0	5.50578660963145e-06	0.0199092439427868	0.000506562731698355
0.00235513587019065	0.000443742029913988	0.000742324709690285	0.0104871082267535	0.00118817108593375	0.00532836139362988	0.00722522217010949	0.00445387834577836	0.00171936212514916	0.00865502420330349	0.000523016272496993	0.000435973304716131	0.000680547325669894	0.000330347943195835	0.000270965978788742	0.0291390560466768	0.0084005764064189	0.00411717772158924	0.0131917086662635	2.80736421710109e-05	0.00120738670776678	3.84219303663275e-06	0.0019249924808126	0.00379084599168375	0.000899013253799418	6.55150565253559e-05	0.0116243310252227	0.0151523372876405	0.000272290095925338	0.00326717022277017	5.08151780744832e-07	1.05180160203123e-06	0.00141130039343223	7.62464136569287e-05	0.00319105248419617	0.000135977004846729	0.00205814705285306	6.61862338209335e-05	0.00843052987577447	0.00733366242173218	0.00159876536147947	0.0010225437334304	0.000144401340650609	0.00571775919012423	0.000250761757216804	0.00151500843820201	5.50578660963145e-06	0	0.0196731934421408	0.0119717081124623
0.00471545868835957	0.00115465384639513	0.00125429934366514	0.02379253948199	0.00521909197798427	0.0515720415156107	0.0227203940514253	0.010210540709422	6.03119154243418e-05	0.0205034337427416	0.00371839945675941	0.0273397783002064	0.00425229984317969	0.0469463654619811	0.0756723348746407	0.00441523850292436	0.0675730071927883	0.0247237226118323	0.0403614004168337	0.0520248896486071	0.000410291451185028	0.00600820920830189	0.0198399743895814	0.000893643789413531	0.00591692491076589	0.000622669234207526	0.0446919824301373	0.00269099977197136	0.00118810475086287	0.00777518330260392	0.0160517313474377	0.00683197082213395	0.0252309964562002	0.0473436727683052	0.000269793030713496	5.74719842701291e-05	0.0207139252152817	0.0305858758445251	0.0742859806735321	0.00804318193881995	0.000803717612641903	0.0037563765291614	6.53848859306735e-06	0.00165878775238891	0.00320709643226716	4.59427920951248e-05	0.0199092439427868	0.0196731934421408	0	0.00108230528050153
0.00121640395483305	0.00612367031112147	0.00293240868888774	0.00247137312513279	0.000219744877437252	0.00358949401679343	0.000447846272996055	0.0314771169101586	0.0173646858779662	0.0421868048648596	0.0368395680527852	0.00465629078826493	0.0280492625838927	0.0134634672853489	0.00239439853888793	0.00431914521216938	0.00627197666430704	0.00174847553235913	0.017033171816618	0.00212640095089727	0.0300375315371211	0.0100410204009217	0.0413523670712379	6.93028649252128e-05	0.00102707812744603	0.000264687893641223	9.1166631979348e-05	0.00225241243883789	0.000466966326448166	0.0266385601365133	0.00409792970872211	6.88122988342507e-05	0.0241152667885014	0.034913926759895	0.00488664148674182	0.000886332221509586	0.0269557172704669	0.00630694851493856	0.00354564149529698	0.0210256286099479	0.000425051689086156	0.00344371569752044	0.0336919167159479	0.0259420038210455	0.00147571671422464	0.000167482333396774	0.000506562731698355	0.0119717081124623	0.00108230528050153	0
0.0228619482873684	0.0289946031338094	0.0265646417604527	0.0359600489228128	0.00809687395336284	0.0830610999117896	0.043798458480574	0.121577903665047	0.0280145838936709	0.00611786679733652	0.0109204271603622	0.0648335158355947	0.0542174001849519	0.00772323622425755	0.000713018894882062	0.00163291014041866	0.0167655575269096	5.66394827004188e-05	0.0305743521561825	0.0544427388092462	0.0329039026785964	0.0156164237298748	0.051312343534625	0.00275788259911408	0.00362173931840914	0.00353444906971842	0.0205897312389614	0.00982440440671977	0.00662322583811045	2.55509670267287e-05	1.75895144972852e-06	8.60886118230384e-06	0.000220367171268163	0.000219910502972999	0.00548150652796554	0.0175813601458564	0.0248885416247182	0.0118608448393381	0.00136993305825504	0.00477343561437572	0.00559631363987644	2.41150866610086e-05	0.00547551457616459	0.00858727323301157	0.0149714641200434	0.0113960818549825	1.74840769543577e-05	0.00615436721695299	0.0139399963497528	0.0196562984375787
0.0103105585571633	0.036642486402132	9.49895610672548e-05	0.00434027964248006	0.000597017854563312	0.0181975502105889	0.0376476312873426	0.0126723182722228	0.0510110958285245	0.0493676103377478	0.113715911309152	0.0365395033366767	0.0454851486881397	0.112046106600588	0.0656792187426301	0.0214600596903264	0.0483587457537314	0.0913357266472212	0.150795147627974	0.0500339594048904	0.0962628691345186	0.0389053801971074	0.00809112497748966	0.026185321426298	0.0406715177641802	0.0189589096705165	0.121829702092186	0.0208202778605	0.0920402543479187	0.00148405818997502	0.0031188043628111	0.00217092795033299	0.0033166833577431	0.00478973456343067	0.00498078757112552	0.0150031572106657	0.014665949690852	0.0162454028716029	0.0175796852957918	0.017810708134706	0.00418959413519597	0.00141604926573006	0.0151134840453152	0.000892749246401817	0.00105389903680987	0.000876119077351527	0.00547539289282662	0.0112688180741064	0.00943771820115433	0.0120282620117296
0.0331469712867452	0.0665996502444247	0.0140325714319558	0.0777642842488894	0.01218375321704	0.0951675865396698	0.0410962094080997	0.110423465467473	0.0177007839244708	0.0073293683761591	0.0246923160418641	0.0748182986393658	0.0302539514056165	0.0245394025032852	0.0151702173539776	0.0053157519015507	0.00175086990280308	0.0360115880185458	0.104898629355882	0.128372486121968	0.120564259172877	0.0242698463411448	0.0223310677691974	0.000683264849392466	0.0100084940521543	0.000120969823547813	0.0384325991599697	0.00472844260035033	0.00957620523335078	0.00449370250449302	0.0297227080407317	0.00144497354733384	3.61364976115985e-05	0.0136605612479485	0.00253109010744889	0.0274126060519645	0.0562770543920781	0.0268612960161374	0.00180692577063373	0.00153190158649115	8.57579432822359e-05	0.00648754243217735	0.000180689062616854	0.00823940532477781	0.000335585514852963	0.00256811840834792	0.00100486653128217	0.00644690909456463	0.00217339329248253	0.0473298206703683
0.0186264609808715	0.027262872508549	0.00292961569732764	0.0104505722311083	0.000684351652691517	0.000155572163077953	0.0102136709935348	0.0264469132387516	0.0224782185559584	0.0140529573738983	0.0530102811311106	0.015874940845604	0.0178363771735027	0.0241560553642556	0.0671975463323759	0.0155894552109049	0.000832819270457321	0.0303239556262426	0.106270963348496	0.00367251064872217	0.0564825622653082	0.0144237007818802	0.00404010617921814	0.0179385078043639	0.00252379094794832	0.00176822444894813	0.0982973799496285	0.0105719013211166	0.0102296633990724	0.00182909888700899	0.0230361504370652	0.000270765463819584	0.0133324475559642	0.022888849995822	0.000798307376834838	0.0228681550757899	0.00783152592165296	0.00196798859554316	0.0187032796236593	0.0295318898538949	0.000991263278796431	5.00693791360309e-05	0.0201946736916998	0.0107435993642686	0.00155265629310689	0.00193924985353712	0.000107314203706391	0.0143842993894816	3.62243254580295e-05	0.000256114766934025
0.0123866522461469	0.0560786812069632	0.0514290104920944	0.000191645540600486	0.0215329475327371	5.31326976361039e-05	0.00963507450291282	0.0252180103049984	0.0204815076220433	0.000484660261669322	4.64873790397722e-05	0.015719292803214	8.26018773266845e-05	0.012061459037478	0.0181891785661494	0.00383151334958037	0.0351052475530543	0.0102024571316099	0.00569087825410959	0.00444330014553692	0.00484954422169725	2.42396770097207e-06	0.00562241062159519	0.00978013090708952	0.0534678265988217	0.0151035679388885	0.00252746806719023	0.00653662952722875	0.00117357979549553	0.00730726918528485	0.000358435597250166	0.0579601469492533	0.0458983701166522	0.00678674441786262	0.013106518823054	0.00303750630588344	0.00052609504069668	0.0221386442846138	0.0126932832937725	0.00279977667646938	0.017810166552095	0.000414422352154862	0.00198529621611865	0.0354823525254814	0.0211668871275344	0.00798610595463123	0.0102482114320856	0.00374995379061583	0.0182165042209184	0.00704119465783859
0.0288573319846073	0.0127612132255821	0.00680572070119323	0.00314370806777965	0.00248452243156688	0.00958785088807584	0.00122270618745676	0.00132451866283992	0.0508417647718925	0.01131504764	0.0292101528397576	0.00274002539489599	0.0229366409878738	0.00416661982837279	7.15978561263126e-05	0.000964470605199904	5.20233785706365e-05	0.00219239289026015	0.036928825505656	0.0175980375315152	0.00938499362882646	0.00133535179283049	0.00265608292655609	0.00280603074577408	0.00482544713870773	0.000934431431131986	0.00341862929204289	0.0014810154039441	3.65312812122627e-05	0.00218046349088801	0.00712271946942516	0.0100838386031607	0.00500774614202136	0.00192789108771514	0.00241992997952996	0.00275351604933987	0.00424828930496517	0.0123952957255799	0.000771726228066218	0.00134796275896639	0.0347931912828869	0.013592869243692	4.91255616369575e-05	0.00409761074623801	0.00184030256210099	0.00254858994561544	0.00459036176229759	0.00798993664530176	0.00456388051287224	0.031974476447012
0.00347889988894013	0.00332581794259771	0.00929725650076279	0.00101787098787898	0.0118914027500584	0.00317779762694413	0.0208652094541075	0.0369642965261579	0.00172820814311363	0.0075765349386807	0.0147391845871144	0.00090061776808437	0.0265589635247426	0.0542204541630933	0.034961847312202	0.00015371463484662	0.00649742442303931	0.0249869560257876	0.108890364481812	0.00278554949152619	0.0792168114935654	0.0289729835546292	0.00203623004180485	0.00442582720119195	4.12442055750446e-05	0.0195150009729361	0.0573468264468325	0.00164890558716801	9.50022393150427e-05	0.00079166229622086	0.00999482261292622	4.79146507248077e-06	3.40731778346718e-05	0.00777776453294133	0.0121100322429007	0.00782210556476693	0.0130599982309746	0.00341778095063141	2.69813808245315e-07	0.00165451659085994	0.000333322790990931	0.0174159484501756	0.00825757150565982	0.00876101208319609	0.000670785735719227	0.00364077912377838	0.00156977284120022	0.0105179548520785	7.62644574088319e-05	0.00294217588498585
0.000759964880532064	0.0176066791474655	3.42723432553407e-05	0.0248101464354141	0.00872341533385596	0.00170846182497358	0.00187782581037496	0.0128805190624328	0.00281118514446647	0.0125209096641295	0.0247817363086198	0.000436448291094572	0.0176279831290647	0.0382856709996288	0.0426072610555822	0.00257537776503767	0.00202275228021031	0.0199332771678803	0.0914520769948184	0.000164516097063576	0.0802729501231541	0.0177719777960894	0.00834762423446391	0.0236669203990304	0.000710319428050833	0.0018882454239828	0.070536410888072	0.00153038274157393	0.00120496172947357	0.000698239517868819	0.018351315855739	0.0237331445973904	0.00707488733843551	0.0132212562287713	4.76334609662668e-05	0.00703604194283711	0.00922399217880731	9.35436126976919e-05	0.00269099989129358	0.000702072845432359	0.0564565194912709	0.000198351881420075	0.0296747417111251	0.0146214913090956	0.000325982291169546	0.00809840496013438	0.00611001709268591	0.00510458488577362	0.00152515301210588	0.0139521545931469
0.000147989354746189	0.00899786546862962	0.000760583385610234	0.00311460164012195	0.0028674655865038	3.76288154209001e-05	0.000348876222297746	0.0212228285225153	0.000511031466077322	0.00274531710537976	0.0185166928393536	0.0100466009102041	0.00773350094598751	0.00620757995346683	0.0498286197557394	0.00476200944946073	0.00137907089579284	0.00555701502858044	0.10052803620448	0.0110932574695739	0.0282288920405693	0.00818657814134956	0.000626871327500832	0.000256593405516685	0.00220274259060801	0.00643532837626691	0.0523958390819956	0.00159632022011742	0.00679869261599951	0.00427748869715222	0.00318131890584636	0.00468427860654469	0.000163346286138157	0.00916143233855124	4.69892390858562e-05	0.00381930896706177	0.011282944344503	0.00597746583828649	0.0487091867235178	0.0791334389633923	0.00326738508630773	0.00754858743724681	0.0100835632156363	0.0100580160584792	0.000162855278883671	0.00275916339214063	0.00357584225490061	0.0137076203738847	0.0138815228045496	0.00822259463887323
0.0198001846124016	0.051253468133234	0.00107238424352005	0.0098623755840322	0.0104156968680216	0.0198581728224207	0.00417443663468346	0.0359340952596353	0.00642331338440765	0.018065915428213	0.0102920394854063	0.0129109830931979	0.0234738434891142	0.0498880232298063	0.0206622590559636	0.00907596737346821	0.00401488426849307	0.027396199196901	0.0844711491958313	0.0458015682091116	0.0949319863361823	0.0442667659862957	0.0217891316151526	5.59798377626937e-05	1.51450112796769e-05	0.0480626880685924	0.10333668283804	0.0320504421658424	0.0155751993861197	0.0146802212611936	0.0324629672431525	0.00359734108875527	0.0141951850855498	0.0459599841860901	0.0238448536518167	0.0551654553968901	0.0695805573581091	0.0326404282218535	0.0116641138261197	0.00774441982930806	0.0473485131449554	0.0117645349865436	2.60558273547132e-10	0.0121145758460775	0.000143520200664197	0.00886781610129545	0.0143132779263108	6.98183104973431e-05	0.000427672641660757	0.00913692947765607
0.000894652208305959	0.0294303662583606	0.0208525770493557	0.00367680389217762	0.00497869492879989	0.00498519130001239	0.00737298655449657	0.00471310199292857	0.0429388076039854	0.0348066631926678	0.0182462609349509	0.0189380217842902	0.00244546731602394	0.00706748836526426	0.0100065907768345	0.0045781502149234	4.490912537195e-05	0.00394281275774712	0.0925306942848144	0.00308868282204064	0.06049676842171	0.0331525541050806	0.000705040060260137	0.0307030959636766	0.00646291441012958	0.0357422653855808	0.137316643536182	0.0253511997981214	4.01413174464591e-05	0.00123318526375457	0.0171204359539752	0.00337797222720697	0.00107327043572238	0.0231177529676764	0.00853248554480367	0.0434343687118155	0.0190296023726486	0.0168578360819971	0.0157964848519741	0.00502156703738563	0.0282517315602387	0.0425973165740321	0.00377362952837962	0.00058911196292658	0.00164162090016438	0.00289901626367484	0.0144550963637728	0.0297628290066236	0.000654870781564304	0.000440631395954488
0.000533828410310583	0.000803308051805888	0.00904229358487481	0.000159648286871273	0.00940422885293431	0.0105301148537408	0.000219991921569875	0.0150633159325201	0.0054077817878177	0.00549912755926411	0.00840493863565516	0.000418078768427327	0.0046907257758891	0.0268664310477926	0.0447414033871008	0.00883866027384694	0.0242637107098284	0.0258716581683622	0.0123510060338601	4.192854107927e-06	0.00885701732725586	0.0169707872423579	0.001800482467005	2.08527348239723e-05	0.0414936058183032	0.000212695688227818	0.0132818296031932	0.0010650886500228	0.00315331516260913	0.00136771377263214	0.000107569163976495	0.00307213950649413	0.00419100769948661	0.011488801723987	0.0337970371325106	3.33772740632619e-07	0.00575361317426278	0.0023478941975022	0.00325813131620946	0.00297059507848093	9.50837043564691e-05	0.00561219070329508	0.0108736816782669	0.032441404877268	0.00547193780385521	0.0011797248618728	0.0094743487528842	0.00812099695024259	0.000951329534351299	0.00473318937041515
0.00086690225858786	0.00106566212909473	0.00257047481971129	0.00307533258323404	0.00236153624925291	0.0255043499428387	0.0248576206795399	0.0457768204328541	0.000243067025352858	0.00165834951951774	0.0058281751948486	0.0115410204753488	0.000163689827357237	1.51222944193991e-05	0.00139013411039983	0.000789596111290894	0.00175914257800823	0.00125599630250161	0.0419601635115055	0.0224916155431023	0.0185840266877123	5.80091130815155e-06	0.00325587774143644	0.000950916178817107	0.00283029596163174	0.00697574231320105	0.000668261206234359	0.00159316600910311	0.000164555406321051	0.000598904816818418	0.00169297455085059	0.00441007167140894	0.00649357026998852	1.97779934568625e-06	0.00225740728995605	0.000585041160234087	0.0167900726522439	0.00256081419810884	0.000259361955253455	4.48219945720004e-05	0.0023052455231472	0.000652078871756967	0.00290122548923535	0.00323640973358079	0.00405232578428999	0.0185307343438357	0.000306966894384086	0.00709741304290903	0.0023523672856595	4.39475825585035e-05
0.00709742719324087	0.0160329809337432	0.00244348540822837	0.0112142902447527	3.88441849744025e-05	0.0546944090829652	0.0212052903784206	0.0343395887402247	0.00254213302984203	0.00651724154458357	0.0347509553360869	0.0527162631815227	0.0158832489359334	0.00962849397711213	0.00167902353164952	0.0112659688815239	0.00010037546290008	0.0121165572589555	0.0338917169540126	0.0666269091873716	0.0773459451752476	0.0119804510583914	0.000452815525346052	0.00744060735747071	0.010998400652174	0.00513832394274154	0.00226982761981615	0.00445495901123323	0.00392727289490693	8.67056266369942e-07	0.00234846761937888	0.000268548099089756	0.00385706527149616	0.0101736739804126	0.000111152641995153	0.00292922031134456	0.0639222543964909	0.0220385863633537	4.07042760796742e-07	0.00182822965149941	0.000147903749628972	0.000128241519526294	7.0620612089855e-05	0.00114467301780703	0.00216625194834724	0.00311877822200874	1.31317896756283e-05	0.0124226129632172	0.00663202351070562	0.0273083722749981
0.0159716104316454	0.0140600121354156	4.95055169239565e-05	0.0300996404467937	0.00352010192871171	0.0166977363205891	0.0262384597919855	0.00894396659523802	0.00758460095923992	0.000595261146155912	0.0101022638504325	0.0414583971464215	0.000382341148560595	0.0147632656568856	0.00916456263634841	0.00367048518828057	0.0106026944607381	0.0221088369181697	0.0591108836339637	0.118093367957233	0.0402379867438893	0.00512574059578069	0.000581147486978641	0.0266697813454218	0.0541251279150357	0.0419265109473864	0.00197365445307077	0.00455149635819952	0.00791785320767901	0.0153231271824701	0.00868282319896448	0.00109720319386181	0.00359293275722493	0.0213856880200495	0.0282772371112785	0.0199448618037557	0.058996296865143	0.0330030783750405	0.00628953795737251	0.000166598272166445	0.0350527974073151	0.000231791854031399	0.00219891372596381	0.000538449285193382	1.3201211859502e-05	0.00416365416550881	0.00455018131634637	0.00293264884821141	6.92364430257732e-06	0.0319425975182038
0.0141647053703732	0.0356967128621194	0.00240427989091127	0.00792131057865144	0.000373605252001682	0.0127634294246741	0.0234659229836338	0.0113147014311886	0.0264869766021582	0.00936675227686611	0.0271838310960709	0.0269892360412856	0.00854167060077878	0.0726108008941065	0.0383414573560742	0.00967289762796933	0.0340896848886785	0.0587327482452045	0.105065823669828	0.0935791002195966	0.0586876631522031	0.0237628465011814	0.00278890503987747	0.0303050353663207	0.0614044545499841	0.0478291232078476	0.0706768860688493	0.0269811127373223	0.035943167946639	0.0139556221249383	0.00733891997171128	0.00841962641201117	0.024067565276489	0.0296824844189032	0.0563958105174397	0.0361468049838851	0.0381107136792246	0.0329235674398701	0.0465183366268353	0.00916751633764411	0.0280323604424246	0.000344952386073314	0.0201582872584044	0.00289910258700412	0.000641257284162146	0.000649282682236951	0.0119536571069399	0.00114942829596639	0.0126356848794424	0.00324332139759195
0.034752916871332	0.0856386709598912	0.0335378025370681	0.0335385480371345	4.87487422487752e-05	0.00526319129929036	0.02901375203636	0.0276374778243142	0.0118449188719853	0.000887639975818246	0.0332871292304715	7.41358120927867e-06	0.0110572561140044	0.0382757732476284	0.0354873641267433	0.0103608911619456	0.0098850096996584	0.0279372193875217	0.099663620641217	0.0160238605426133	0.0648533762648917	0.0130716890986659	0.00216815487114528	0.00286432284080707	0.0181533672050887	0.0105166236814424	0.0373880633052527	0.000456133279418573	0.0138912966307412	0.000647682376246901	0.00576444535864142	0.0344419425261209	0.000454323798431121	0.00452690500736191	0.0108967082823002	0.00174477792390544	0.00567756765388344	0.000795439254153573	0.00647090328041549	0.00241425750146703	0.00600153365155285	0.0201116244200109	0.000408630682899368	0.00358362645340007	0.0316935497891817	0.0584580894377962	0.0116438011810996	0.00652301973918154	0.00969112640557125	0.0378105910985609
0.0201195065061283	0.00119641957385819	0.0091506514253726	0.000127446636822727	0.00842197685437254	0.000109210301728071	0.0103555021221598	0.00749218265375071	0.0103102740308109	0.00423306412306883	0.0238283677762379	0.0370056383609804	0.0518652293222746	0.0103031835123387	0.000297393227626959	0.0101282640113965	0.0012906034297464	0.00172703721688159	0.0388916497645292	0.0171215288540147	0.0679751489085086	0.0134361911042404	0.0125472955244938	0.000391533484251053	0.0143419312004175	0.00856527659813971	0.00692491625380924	1.47306724176979e-05	0.0105270601315943	0.0106468524418283	0.000157388332601567	0.000237349590074389	0.0042843898245823	0.00811450642342803	0.0103707529397166	0.00455599769439216	0.0429389500924816	0.00568112181257945	0.0012348282958473	0.000354194731262601	0.0188744781298441	0.00194154500786359	0.000230425104083978	0.000674407540919625	1.74380541609371e-05	0.00466904781620461	0.00366814415771943	0.00147292668561747	0.00364172948158109	0.0127777103090956
0.0267853070710149	0.0371574073903783	0.00133305338114045	0.0303760739591429	0.0169651269158054	0.0339809160012473	0.0165808143050959	0.00502774370050623	0.00265597878184757	0.00105180918014844	0.00130310201823818	0.00237063097324781	0.000250516748569603	4.12531146200567e-05	0.00807231859924759	0.00443801237951139	0.0299372085171021	0.0109833633041384	0.0201311245647927	0.0200223276525252	0.0241142102359047	0.00398997441806133	0.010032961273325	0.00314941493221878	0.000329390247291309	0.00686451537394215	0.00288224127524362	0.0104416581003609	0.00674979863903095	0.000111369305156041	0.000118193651949239	0.00692752564084514	0.00172510383581716	1.54413574903693e-05	0.024332790738345	0.0195320105998759	0.0408773375971965	0.020997708721843	0.000792028545866419	0.0205364556317567	0.0297459496121588	0.0110688288481241	0.0328915220203957	0.0526651107387986	0.00262010611108351	0.00393427884198624	0.00443210927138011	0.0109835683824241	0.00282553997601436	0.00355881674717206
0.00207567814471743	0.00435967339692172	3.5479751335705e-06	0.020256210999608	0.00107918246434777	0.0400896768141302	0.00468242738542424	5.68791585315772e-05	1.62172422500548e-05	1.80607924402436e-05	0.0018484566605603	0.0021034215631705	0.00343833468049271	0.000475150240633503	0.00286017682387809	2.23252468985781e-05	0.0033765456819336	0.00590213747121781	0.00231808357645815	0.000111556632474807	0.00351306197404741	0.000183128334706463	0.00287962183929271	0.000730540544660933	0.00249617021787229	0.00892577453704687	0.000219761588907967	0.00118975796637459	0.00325161510954459	0.0118519233176501	0.00158558914304603	0.00972733980133277	0.0133683488607835	0.00348302158986094	0.00491320212030027	0.00596411687533178	0.00512857499045864	0.00338570952850585	0.00469592923864736	0.0017186744772786	0.00198793174586281	0.000632866569898705	0.00033652524948445	0.000982128928813808	2.90622469829189e-05	0.000484377869762209	0.00655016625765436	0.0367632248961842	0.00489344500224362	0.00411900175967118
0.000208468305555305	0.0012671966948829	0.000174967479543992	0.00307176157365766	0.0150774824192576	0.00783704738491278	0.000422733451774791	0.00446333557248689	0.00308775281458984	0.00572357624858231	0.00636667236775069	0.0011274880113404	0.00013775467367285	0.0307978955869277	0.027260957398494	0.00223330941240936	0.014367548756803	0.00701115974258457	0.054604094719617	0.00821633111077118	0.0159327612905694	0.0470481121502553	0.00120762682186507	0.00491236258951906	0.000107487618550335	0.0021644467150772	0.043265015927912	0.00199471391504915	0.0064452443606067	0.0107046354303066	0.0232018082741539	0.00583200366549032	0.041910271295543	0.0389315336763232	0.00126645315785871	0.0305778667433251	0.0150182995410145	0.000259711888918986	0.0642710349725719	0.000169618373699561	0.0109027236762962	0.0070704942972834	0.00182018961282862	0.0141329336648928	0.00720576162684667	0.0182469208201576	0.00172359983533034	0.0557412645930849	4.94539474865366e-05	0.00723538736185518
0.00407429782080748	0.0187487462147354	0.0121371997504285	0.000484558989708148	0.00974479317794702	0.00426547773016414	0.00178606068744439	0.000109340604938626	0.00449255432307887	0.0128810254457203	0.00392373469379723	0.00575897269773864	0.00123092258516494	0.0478771579699807	0.0365162378089804	0.00294186479999118	0.0321673221584108	0.0202725187383236	0.0300762181947336	5.08570062036538e-07	0.0127882098987231	0.00462944026234387	3.87433781962179e-05	0.000829934915100714	0.0012932060428749	0.0472123385197113	0.0277302586620563	0.013403317667102	0.00874477192225084	0.0110358841960509	0.00253037468187193	0.00267293547998928	0.0186999290373089	0.0344891551218785	0.025673880467704	0.00617876692169227	0.00129074889261204	0.00069683511952118	0.0301202511015202	0.0133258649699071	0.0787521342799969	0.00280051017596797	0.00131085189116804	1.13042464138125e-05	5.10285264117347e-05	0.00202783475639872	0.0126473666646057	0.00841153317033367	0.000122947100990599	0.00446684911840901
0.000251324887777201	0.0337019691910177	0.0464322192353314	0.0334236521312817	9.45608646771104e-05	0.0283726715741142	0.0268641871699013	0.0239631762928022	0.00820168046511418	0.00113032395473	0.00156959267696929	0.00320991590972617	9.66682825386823e-05	0.010238893816418	0.000975625834677662	0.00798673367019328	1.73070000912401e-05	0.0101360925310355	0.00556182214591456	0.00193885101560983	0.00181840208543808	2.52369894563315e-05	0.00167354339175786	0.0124012928628801	0.0319576430539565	0.0282067105136729	0.0672053323539263	0.0338232564909957	0.0290229846073955	0.10169906449749	0.0470238439896275	0.197135776865085	0.175335326723101	0.0919636605077132	0.0695939130224245	0.0293600850657981	0.0448965561009609	0.00999427852433344	0.0781682083591524	0.120722140669024	0.0663500137802631	0.0115650989271399	0.0775889543529633	0.0295627813141812	0.108500010618504	0.201531808413347	0.128829329429775	0.00265858319484911	0.167332936936197	0.0157498805529408
0.045244165231809	0.166050235788588	0.131636255629338	0.0584160186623137	0.00752933546779028	0.0785992897417312	0.0968782073030101	0.126174258812871	0.0825945243645953	0.0395752492919174	0.0258536926892164	0.126983777942551	0.0784708058799361	0.0038827184091426	0.00640347430474894	8.32659591678907e-05	0.00662451652828352	0.0328279860166384	0.0162354869173609	0.0021746587338452	0.0372835121432466	0.0163082329257925	0.0111391524319538	0.00337238989528251	1.60098759409434e-05	1.16731715758672e-05	0.0151067816188471	0.0205050169693675	0.0348939968136562	0.0817316400133091	0.0566645661984751	0.175010413745582	0.147897453788068	0.0695798828942028	0.022385465727525	0.0137473086021513	0.00587636823655783	9.34002345678934e-05	0.0821706401328906	0.0967628654373914	0.0783762818231666	0.0407242532491431	0.11023933547578	0.0104204704348062	0.0595019681597555	0.109588943520353	0.152605784798612	0.000297637991625086	0.137846937689252	0.0334501971750208
0.00764041330211366	0.0175297751805475	0.0127504970403562	0.0392540168167819	0.0137133235396838	0.000347709215231018	0.0321434573066448	0.00972426360367188	0.0286659753520097	1.94982287901629e-05	0.00772721606988532	0.057006315947001	0.0872042526300034	0.0182294789692774	0.00732216439958613	0.000114627862721144	0.00353721290298157	0.000850615272612879	0.0399657569946249	0.0824795241347997	0.0660410310590764	0.0208924017016038	0.0163113800066368	0.0449455956879384	1.86516482032576e-05	0.00475929216009651	0.0215907082237096	0.0236472882912301	0.00450402607488238	0.00592279468059444	0.00108724429473557	0.0153692766126099	0.000147326841758451	0.00419676989168539	0.00721153989157274	0.00891104622339375	0.00622400582269132	0.0277307585248701	0.005694717059757	0.00815412837713432	4.33485066621501e-05	0.0336228370254265	0.00201577028070936	0.00226297220876455	0.00146196321400837	0.0907065396123232	0.00393600762825278	0.000254209314452934	0.0133078996187149	0.0232146836937902
0.00526540667022148	0.0635179411898205	0.0310609659534566	0.0586709574194673	0.0130046716789365	0.0552751649936935	0.0235167541547482	0.0126056033043246	0.00786566307685107	0.00383183220667284	0.00493658685760921	0.00488959755955959	3.46503416607563e-06	0.0139497241175989	0.00345708825479165	0.0222645731695625	0.0105206855764039	0.0256990385750854	0.00367967521396023	0.011609793884536	0.00446904172593591	0.0149206395900509	5.27017007106574e-05	0.000423775710803661	0.000970723350715624	0.00713593433413639	0.0525808027534025	0.00888125530770683	0.0292695197626665	0.0493916842999329	0.0156241468135777	0.111403896159171	0.149349889721396	0.0712824787210035	0.0166577775392203	0.0254722452197269	0.0507203322011166	0.0034609661218513	0.032355559899389	0.0562599250947579	0.0170455896369593	0.000643122414186338	0.0227473844519245	0.0169702430367754	0.034001478948544	0.0794830481855858	0.0836043309033584	0.00640905488330166	0.0754817205417697	0.0235577519946841
0.000379751225242573	0.0338689256575275	0.0108633209898562	0.0178957199334422	0.000146133829820532	0.00756433072671883	0.0200600298396418	0.000906732890901215	0.00520924373907644	0.000761575460830847	1.47400855766552e-05	0.000324025374985848	0.00320740554756073	0.000552817561455539	0.00856733324653497	0.0080770411385018	0.0499993756063399	0.0485622058993626	0.00460548861125618	0.00107785960099158	0.00085015955588138	0.00450360467044711	0.000645654757858352	0.0016303909727895	8.3355599819786e-05	0.00323727397636687	0.0113066666106309	0.0119331467768253	0.0293016131441133	0.0471504943319767	0.00642213256023518	0.0606899899794844	0.0550509204702348	0.0263699321825931	0.00740521348087002	0.0140135445853551	0.0494186200410865	0.0194281773980454	0.00290787507795035	0.0231190192002004	0.0185084475588584	0.00115887989743856	0.0155935401548252	0.00751199673269611	0.0153880036264529	0.0252280453462561	0.0343527549579021	1.32779698688729e-05	0.020741221548514	0.00501389339882185
3.99465913855843e-06	0.000581790045465125	0.00666592727971306	0.00716039938477927	0.00748457980194913	0.00279068683232833	4.25608319159235e-05	0.00125896720940766	0.000236030933618039	0.00240793860496937	0.00101975220685258	0.0150737476534137	0.000382097738780379	0.000719608551465021	0.000142943564906912	0.00412679136352402	0.000669016500041533	0.00909804769800686	0.00163494703063478	0.0361738280166518	0.000300106416368177	0.00136688752586251	0.00696913410483423	0.0175711614584387	0.0120740668418167	0.0197902754661589	0.0271400254528615	0.000205688443179901	9.74891159952648e-07	0.00232019461342541	1.6368527187895e-05	0.00147326932800088	0.0023621828927875	0.000170288994463521	0.00721252866791931	0.000261855339337044	0.032819669041018	0.0156050531268905	0.0063308279726007	0.00225991174338802	0.049935064592805	0.00270584714731083	0.0241355406251709	0.00741513158599403	0.00271715786969683	0.0080868948655667	0.000818460143822316	0.0248619297974989	0.0172922781137021	0.0152674990611815
0.00183503975460763	0.000330994444628279	0.0182803235428015	0.0122567033597507	0.00624494962506982	0.0212321801504292	0.00162011573698459	0.0015517029927094	0.00155183320271932	0.0184741032729313	5.02560870964722e-05	0.0343583011814128	0.000661563643513103	0.000786285038996124	0.000914842220079208	0.000320327078446113	0.00348797921163848	0.00815811500872504	0.0181869176422507	0.083202959334814	0.0399585228077448	0.00332035653735634	0.00472380770582682	4.11730765939429e-05	0.00952635865950547	0.00345035734274061	0.0148730402844522	0.00103550151734591	2.79784638539843e-05	4.36131982338715e-05	2.58330456721494e-05	0.00393304576076747	0.00487365552652836	8.52570436118965e-06	0.00444697445990808	2.28551905144221e-05	0.0721373740375822	0.0313661431407246	0.00280412502986709	0.0016108275616236	0.0275110647507661	0.00371518129704395	0.00732801929655687	0.00133202602683033	0.00705578840655642	0.0296467984500278	0.00424757756039957	0.0144351534256194	0.0232545547853289	0.00506236506288563
0.068752023913442	0.00572983070886021	0.0100231063124106	0.0210101924722328	0.035809522414572	0.0267150466839973	0.0221643975457654	0.0316783721177283	0.0310216083758666	0.0173790639711082	0.0754030478295462	0.119944353029645	0.0367729086499758	0.0202154944590076	0.0145304949773402	0.0979301395067557	0.0366385705830227	0.0517864342305183	0.0363426010683885	0.0799767563852118	0.0356838691699207	0.00798285711984989	0.0139254417195242	0.0420120746175177	0.0466748939903018	0.0432700539196983	0.00285684286454256	0.00832002489754009	0.0251491206852545	0.032164218416709	0.021316651473843	0.00528452227798641	0.00527884210299226	0.00865191905180977	0.0288959476598615	0.0210718349122027	0.0327656897306168	0.0215373913875899	5.19392001896392e-05	9.01937191394336e-05	0.050841768177897	0.0127460725644519	0.0036577515773634	0.0418691449322243	0.00550063692367619	0.000316262964039507	0.00279835942774152	0.0157507662502824	0.00383366478746891	0.0753456284756342
0.0390011615570718	0.00819813349796345	0.0151168354388487	0.0017848583218963	0.0133695220430784	0.00756893785229416	0.000659100435002389	0.00108824989577024	4.11937780168105e-05	0.00224226491633754	0.0372651498062772	0.0302987520169965	0.000138407353425528	5.75307773476112e-06	0.0010216457362621	0.0184496092145135	0.00683208405378477	0.0206258748618159	0.0140762980897734	0.0468646277941033	0.0114015806184826	0.0180364984967398	0.00363341304111747	0.00257316733483934	0.0127110879347096	0.0224124651330118	0.00320805302190241	0.00231464075388031	0.00861364523898753	0.0137313606951032	0.00222601769412557	0.00145040936741547	0.00134766046951018	0.00238510938758298	0.0264668073355143	0.00873151106817353	0.010993646865428	0.00564822057992331	0.000188099308235302	0.000274549126362593	0.0552126797004169	0.0108318378180377	0.0089414758123651	0.00170310252404543	0.000715819799216413	1.00645905205184e-05	0.00127930977688222	0.0490635782439407	0.0121365457235204	0.00884427855348103
0.0384848693166994	0.00191443907203874	0.0171232703629586	4.64540121467639e-05	0.00910251224532538	0.00412409135397244	0.000886119700088797	0.00234930612177919	0.00356078985184835	0.000450341867765863	0.0195172556839982	0.0295065062658719	0.0272286283564123	0.000545338677370302	0.00520092481188441	0.00380613610574876	0.00699446974328903	1.51490742897713e-07	0.00617617748746655	0.00990471340015003	0.027474629070548	2.79025866576238e-06	0.0046473246651494	0.000671764328039551	0.0112556426986148	0.00430404107738981	8.9378014213274e-06	0.0121508640339489	0.00454059890573085	0.00446835823109711	0.00289501127197677	0.000348849586195899	2.11960283004395e-07	0.00115197109734164	0.00448372863575206	0.00693393086295496	0.0250093370363577	0.00272978672781784	0.00325145578043573	0.00312456158931388	0.0196248203347544	3.51750243942863e-05	0.0122192577577424	0.00322556231449491	0.00334228904459076	0.000872675342203002	0.000930918461932383	0.0161651641473869	0.00189231092004152	0.00901283571877769
1.73284375727396e-08	0.0240187425982353	0.00105073369023566	0.0209745301622602	0.00556207463195658	0.000219819851139587	0.00114449568042287	0.0129433861729477	0.0023547052776574	0.0495152523178261	0.0015418487656186	0.00475472843854525	0.00218647557105562	0.00725884325517799	0.000198149298079408	0.0192039835545961	1.27834780377359e-06	0.00783294924984515	1.18200172408437e-06	0.013436340301928	0.000198359603585286	0.000495202778315894	0.00187777803470375	5.23834480499862e-05	0.000950325157453415	7.64765409063758e-06	0.0428940213964612	0.00206983117801551	0.000424444009586397	0.000219882375804867	0.00065861836713654	0.0127251942085263	0.0171474613938848	0.0105829843074058	0.023840723032852	0.00205423746251853	5.9282647659959e-05	0.0006920887891112	0.0144503900627527	0.00149347663666746	0.051142239853106	0.000892621632761047	0.0225984605908601	0.00270305989018265	0.000516777652066256	0.0450332850897305	0.000876974553676318	0.00852465813195972	0.0341429120573548	0.000630674504312551
0.00225425064324406	0.00354795833736758	5.73056828114952e-05	0.0231077286859941	0.00419361690119879	0.00705779339712217	0.00017540763027477	0.00129803607308381	0.000796990611246308	0.0206012127055975	1.52584713332284e-05	0.0179775388163844	0.00272423597527425	0.00506117785963404	0.00114293794523751	0.0347525033163073	0.00216704128169403	0.0128809464842972	0.000262310206576485	0.033168361523826	0.000227356584431813	0.00023891816696035	0.00228907660558546	0.00681097060236216	0.000995998537145437	1.12856941826103e-06	0.0466902636708285	2.54069165427069e-05	0.00231099767021417	0.00378248008597011	0.00969478505979748	0.0113616553501104	0.0106733254727025	0.000858565305318111	0.0130606545664708	0.000442994361163776	0.00388541124929648	0.00252622908494492	0.0164567500364307	0.00284891256040357	0.0428123861970389	0.00093118279681486	0.024095534529934	0.00259200118884272	0.00636362687739089	0.0455435923462987	0.00026529831339876	0.0225524651299814	0.0192233177401363	0.0114056958825614
0.00692113423321722	0.000932890903777297	0.00123639372293878	0.0273419838839245	0.00481288729776459	0.0272068453628077	0.00727266475713152	3.12755177387999e-06	5.99825516854713e-05	0.00221234915861269	0.010606701209238	0.0318908343572327	0.00148604590966694	0.000503639886195948	0.000113190613206434	0.0152994259682491	0.00528304869532872	0.0242054168211164	0.00075991424512346	0.0527300530065591	0.00137822143866574	0.00035928632540573	0.0201934432692817	0.0133238951848726	0.0307160612323051	0.00820437343923488	0.0199535260694997	0.0027110985946964	0.0055822079606415	0.00150403563698263	0.000900161738338691	0.0127901917654444	0.0507658367406368	0.00163611799791896	0.025963396256532	0.000145383783763402	0.024109290168093	0.020303576741207	0.0118523622888126	0.00446291336799051	0.02672334500732	0.00123053273369269	0.0172615190611605	0.00894398448465796	3.59197156045338e-05	0.00773693878170924	7.91081682235235e-05	0.0128731301602374	0.0238157595733803	0.0234247972394748
0.00959630120810794	0.014654846228063	0.00733967130881683	0.0559191771106184	0.000857197710094232	0.0225490574286353	0.0296760141282662	0.00597146386244981	0.0204007370090968	1.13058544741182e-05	0.0094743833484617	0.0195639350805386	0.0103901239646457	0.000493410274264374	0.00477360689630613	5.84305637950546e-05	0.0193206781678469	0.0383237978495718	0.0222369768287625	0.00725939448004407	0.0228391855339954	0.0141444533486262	0.00544392843396237	0.00451222948282603	0.0126135685393107	9.57818436189634e-05	0.0240506519213136	0.00165475234336702	0.00990727221914439	0.0235232140459016	0.0201855036884845	0.0901160943031728	0.0642221922138128	0.0351180127412419	0.000244656210947192	0.0222755234788357	0.000123912342111619	0.000101266450993279	0.0125380874614858	0.0239570523074009	0.00100743816804808	0.0333499949182474	0.0304606202478147	0.0116747577551373	0.0174243233006449	0.0939145170253731	0.0590661415231579	0.00641700053705653	0.0779679814714016	0.0229770126524665
0.00412842823463313	0.000186941304598264	0.00304259341208379	9.55877557779117e-05	0.00813191858158105	0.0102220073193626	0.000420132582892222	0.00810946796752434	6.56179439181422e-06	0.000299905747424156	0.0037645495908654	7.9614196382582e-05	0.00063387079690427	0.046671753129456	0.0244970689572773	0.0295995633371965	0.0744335949972698	0.025826202107929	0.00726711934333148	0.000776237835709572	0.00513579353742173	0.000988558663480755	0.00115682489167534	0.0184231289839251	0.0400566684793363	0.00960251996912521	0.0141668224458263	0.0130712960745709	0.0086964552217011	0.0164243374870444	0.0157119488853436	0.01152357409347	0.00723355092718689	0.0159058239401023	0.0410042854341866	0.00610854790470473	0.000479311654120231	0.00751152617363441	0.028331352571894	0.0173922267732896	4.96946035796313e-06	0.00421741633277261	0.0028116979290415	0.000306286732434979	0.000568255830566945	0.0136746583275811	0.0303034371721475	0.00407182017862515	0.000782284982288369	0.00370919780687065
0.013774081676149	0.0140522336524164	0.0115134025772494	0.038571606212668	0.0323555512399994	0.0288073432693617	0.0178309688530819	0.0293014147913107	0.00212081228299662	0.00646400189248515	0.00484099598897856	0.0525149583540981	0.00517220342430143	0.0172046501436486	0.0100929057209025	0.0252702645919473	0.0246136250166527	0.0406193215983677	0.0343075115145951	0.0620652629266554	0.044879140138605	0.0146645407944501	0.0137636637257806	0.00946985180441125	0.0204017088298714	0.000503058861849723	0.000134842949368536	0.000331687332714733	0.0137466943457757	0.0148585328384772	0.0121180092225891	0.00290050832593617	9.1638796408011e-06	0.00759120447524898	0.00685614905691089	0.00073564153562398	0.0101710009256127	0.0202095753474068	8.42768665558666e-06	0.00955030520153503	0.0166476367977588	0.000531653082695106	0.011469149052003	2.62753551544691e-07	0.00847767698968832	0.0435295725664553	0.00017234830624815	0.0301170783002091	0.00631231699906767	0.0363617919042692
0.00010796668249095	0.000931595134183441	0.000515180554260826	0.0115263985844789	0.00119780212572634	0.00212933753695455	0.00457593842896688	0.00240862849719094	0.0107961358748771	0.00148004443687312	0.0039909390228887	0.0270772031767329	0.0176707502665201	0.000104921526116443	0.000554451322756909	0.00298923884670398	0.00149572064909338	0.00656298832764729	0.00155417458494928	0.0201075187573029	0.00606622206525304	0.00766779322495144	0.017796395900134	0.00208498093553653	0.0105145841159347	0.00143974935333481	0.00911296460154542	0.00273726792422933	6.29723769018807e-08	0.000181033617689688	4.12165004866468e-05	0.0169398561895539	0.0275773844484474	0.00306514828127325	0.000617521033129553	0.000667120959301934	0.00430709071947686	0.00790039508537937	0.0248807144715062	0.0175102291904718	0.0125555011970638	0.0369149428562721	0.0324096216348948	0.0365481598088779	0.0128584274692099	0.042440101597716	0.000682121372874537	0.00687874187270325	0.0550725122948579	0.00947872803858025
0.00672296922237486	0.0218465614257016	0.0092770588774191	0.00429306272016792	0.0124855505348137	0.00191574134186634	0.0151671883280581	0.0211150363651286	0.00989650094424229	0.0248320821382161	0.000138980667276541	1.41809194010063e-05	0.00889553956081242	0.00656005278850687	0.00750105811440806	0.00588741258422886	0.000441933338326278	0.000141546427129785	0.000418870846020038	0.000325076404446783	0.00272298697520813	0.0156307764031705	0.00475930844880721	0.00559127732494819	0.0030146282123437	0.00403539487944321	0.041679990153428	0.016644332302892	0.00437441388823367	0.0298645739867185	0.0121731713223666	0.00984406646783056	0.0100910156957224	0.0232786756377284	0.0186642723309565	0.000605484854618829	0.00387501245771171	0.0161513503444074	0.0436933809291311	0.015802898692448	0.004897363314416	0.00805838147087786	0.0318491622167244	0.00075327977703051	0.0208878886241933	0.0165049958553826	0.0161335471384138	0.00150772013598818	0.0418456613245246	9.93428472220538e-06
0.00134429096826539	0.0169343147388075	8.77987498251101e-05	0.00359307357226812	0.00314057883934543	0.00477507348518178	0.0167146723089275	0.0319509962207128	0.0362454812881255	0.0217105756966121	0.0157269716855647	0.0165424579164485	0.0253132108911113	0.0445068065266798	0.0351861329540981	0.00883359239200274	0.0190485788016317	0.0316389835435709	0.00510263526598387	0.00323068418062422	0.0282498952045879	0.00987498247825693	0.00143318245292978	0.000994303154356478	0.000264936354846531	0.00660990797634525	0.0856094263013391	0.0152057518558175	0.0220571651619551	0.0226021975777269	0.0113047189188907	0.0164547747190817	0.0287469028566655	0.0547993012256095	1.92922817952461e-05	0.000807910352564869	0.017273104384498	0.0234286375250785	0.0294876736774518	0.0360331949572568	0.00200931392664997	4.53014590257242e-07	0.0157482978910434	0.00836564642492276	0.00225111165111586	0.0192253929557673	0.00692572460501616	3.15037125034309e-05	0.0243762644608635	0.00399810894050168
0.0244975298495138	0.0369408378741659	0.00645732081778234	0.0116246624367462	0.00239516643691258	0.000516398994797894	0.0191359380682543	0.0158859187627899	0.0280253956717186	0.0336775645847836	0.00674659552894651	0.000805222856559195	0.00945175117559781	0.00312716948923176	0.0116279613818601	0.0102096893885887	0.0128445961030189	1.83079497291124e-06	0.00944997023175412	0.00107620073143027	0.023373945056443	0.00686378385406621	0.00828669119792388	0.0318369600986222	0.0167454728422096	0.000519476315057582	0.0476033642415154	0.0241852458400204	0.0012520848453262	0.00134072381043088	0.0016609992469397	0.000434358711005633	0.000352956455067666	0.000425540251111744	0.00579233693763135	0.0038740228802772	0.000945802288826149	0.0114348776174175	0.0258603853712008	0.0072383018032064	8.10846527989974e-05	0.000667053579789884	0.0387960182873699	0.00402704744789383	0.0181280810531846	0.00532186030246998	2.86173762596137e-06	0.0258437024077436	0.0246905599722475	0.000335591270519465
0.0108871267091677	0.0259180284763678	0.0299793834802027	0.0418696075625853	0.00429452720166626	0.011782561454102	0.039822315527739	0.0531097433329921	0.0312806091102358	0.0909669694309531	0.0264474693020019	0.00534636811909773	0.0343949007891992	0.00885322434710332	0.00866401231551142	0.000133977449879009	0.000128981759940302	0.00336630456694625	0.00429472775202445	0.0119540911690042	0.0443997999442356	0.0101049976880287	0.0161035794120283	0.000556956649435304	0.000188270737607114	0.000433569919263477	0.0516346755561178	0.001473248653581	0.00653137392840787	0.0113136698462317	0.0116078918644001	0.00470363942579994	0.00929578011045207	0.0043477498986781	0.00166203237422719	0.00271388696357589	0.00963057098754732	0.0525700406245546	0.0173129052629775	0.0173368952079512	0.00330567482029498	0.00114962564307603	0.0202755132996889	0.00655804153799097	4.32381391154273e-08	0.0135435877414432	2.54674429739755e-05	0.0034782512102694	0.0406912206113442	0.0223763634521133
0.00930491522459658	0.00618662688395314	0.012036379302953	0.0319406678587112	0.00519954633462576	0.0252196017643167	0.00454834121486613	0.000199703407172859	0.000218259986292473	1.98923245963464e-05	0.0140623937920789	0.0144578039105861	0.0043114071678498	0.000556539117163105	0.00223451288881874	0.00739049180616578	0.0056380961567729	0.00166280751522201	0.0217677846197697	0.0399494989485388	0.0204218370984786	0.000876488504707224	0.00629866695593279	0.0106118882232125	0.0477237833530649	0.0129622934966605	0.0058739750950171	0.00788131181760545	0.000133392716136205	1.4572658622372e-06	0.00463816444064654	0.000780720595619568	0.00311426465731553	0.00237873226744605	0.0166002952579868	0.0112709054616443	0.00965866597310314	0.000285316399508288	0.000301491184074683	5.0627938893314e-05	0.0217921519421847	1.05098413225151e-06	0.0204723039793281	0.00335814917236459	0.00404930863286137	0.00261780646988551	0.000124905832941986	0.0215957193749923	0.00994180810478099	0.0013994953132581
0.0123746382769144	0.00083938723484582	0.00466814083161524	0.0176731306355366	0.00135406355532608	0.0150590698336075	0.0124795357503665	0.0116453755983879	0.00594363648431178	0.0185656523601396	0.00190466549879152	0.00358111646519295	0.00768488010890529	0.0216008865958219	0.0239827231353044	0.0177915519850231	0.053976659173	0.0136924434598904	0.0154949174946501	0.00722995648879582	0.0046977807516374	0.000192236249900101	0.00867083870139421	0.00333252214949353	0.0143724252491128	0.00814410758555512	0.00453730265876675	0.00730244180792197	0.00767652578983198	0.00635805959831052	0.00488464874344345	0.00541345624068197	0.0181852136988659	0.02231324565829	0.0172004490097827	1.24232988539101e-08	0.00289764119548767	0.019182682116415	0.0148605453637835	0.00572859953048719	0.021633198469787	0.00188697321966311	0.0035138547791005	0.000603329604440055	0.000973110725455078	9.27118285721235e-06	0.0161172643475861	0.000130121546598264	0.0111308813217115	0.000111403005472683
0.00441072118988153	0.010261836479206	3.42510536127641e-05	0.00564197778268543	0.0211506542532346	0.00154471204883677	2.30619758184904e-05	0.00225651227480932	0.000572414080890292	0.00370192691049748	0.0276317159088038	0.0160448602260895	0.00807178123161523	3.43404675707627e-05	0.00082841516756548	0.0256036748912386	0.0129363534846439	0.0369864855451178	0.0335511193211178	0.0296318525169051	0.00155530726173184	0.00536349479888898	0.000271078398587148	0.0148023958732953	0.00736137057173758	0.00552024931771895	0.0284799251370146	0.000914280323341267	2.14905945800959e-05	7.9546151008316e-06	0.000285710418271331	0.00922362467198376	0.0104673648852083	0.00331436602020602	0.00590894593744732	0.0026299951893943	0.0197420249755591	0.021085570003732	0.00482479438213012	0.000434495600578583	0.0408625009619985	0.000714614689668888	0.00111560031014199	0.000514224476661183	0.00173131823355308	0.000459688929102859	0.00142558446874128	0.0247579925081903	0.00286802503500234	0.0157472675912252
0.00428400806259286	0.0106458218751577	0.000782960159121679	0.015139504654756	0.00789234449849945	3.34932980609435e-05	0.00922623774583851	2.32794725597595e-05	4.55041395700181e-05	0.000864614404775102	0.0177334156909357	0.0149987446944684	0.00178028805126728	0.000223369835304174	0.000452902174124402	0.0314795344952947	0.00904316672586646	0.0187911362705132	0.00523175734388234	0.0159507007360487	0.00294816697996403	0.000596030009120625	0.00021878125468898	0.0217242448542469	0.0173034495460445	0.00747769657318863	0.0336176129326716	0.000360911548039915	9.91313607794846e-05	0.00159327154266189	0.000543780760701292	0.00434436156255481	0.00630547425092792	0.00095183411411879	0.00551090519592631	0.00620105141417583	0.0210297697193928	0.00704522607855209	0.000755618138017301	0.000162483124464201	0.0707741642969118	0.00038232962966705	0.00884740678721082	0.0001875392555341	2.66313363982197e-05	0.000112831050703879	0.00248206376896412	0.0616122590654158	0.00261619529782808	0.0102433211266199
6.01470069961291e-06	0.00497992789567567	0.000676957890175026	7.54963713423135e-06	0.00793599539653803	0.000832330728075726	0.00475419052706865	0.00015816264778824	0.00799052221181686	0.0036413301285101	0.00196327327813563	0.00960934971814935	1.97452309418051e-05	0.00109343717189262	0.00358417481705667	0.00918648021994298	0.00113236322967232	0.00248479726067208	0.00113662374456946	0.0438889077358444	0.000346181176819889	0.00343703776315006	3.03137597441324e-05	0.00377962773854111	0.00962662895070285	0.00632543650365647	0.00897280234554803	0.000803094309122963	0.0031679292049221	0.00170491492095935	0.00389199590955443	0.000948035628991505	0.000278265500368777	0.00166478531590995	0.0092805617319694	0.00320555935618035	0.0268662340563594	0.0206656072937508	4.72021988911491e-05	0.00206789079491645	0.0713385339841826	0.000513087255889277	0.00438244201213073	0.00349048686817401	0.00249847310773584	0.000859169180897724	0.0057325490602368	0.00536690339272369	0.0104601833498261	0.00228893200798649
0.000245080435939117	0.000394749412420563	0.000117651732799932	0.0025486294225266	0.0201095499355592	0.00211582285412225	0.0148181918083382	4.22557927510887e-06	0.00247607818467829	3.98979887565283e-05	0.0189784722782769	0.0223714089209956	0.00744213082128526	0.000214490386910186	0.00059514586424769	0.0184222519083534	0.00185554490991714	0.00502395983344613	0.000597102190068994	0.0276956547965087	0.00166467021961915	0.00586131304498923	0.00203877981465857	0.0123570266484968	0.0139623395609324	0.00495465163280145	0.0169547670777683	0.000451299012143035	0.000360823711294593	0.000423184027896626	0.0048382521583918	0.0013875706669766	0.00198923010489279	0.000758646750663964	0.0121728671148734	0.00415034932021817	0.011694188899795	0.0147298400717391	0.00298225049173049	0.00287607466221293	0.0413395228518032	0.00203854038820059	0.0220656426535637	0.00118045962827629	7.10233618788511e-07	6.87285597341292e-06	0.00472247409699571	0.000667009198593244	0.0085783123999546	0.0110883340059749
0.00191766496658842	0.0262196156429193	0.00068375849475962	0.00887231460149216	0.0190263622533358	0.0383352962742994	0.00935842700131871	0.0098735319073882	0.000812123642963887	0.000543986234161597	0.0219919087318923	0.0210832762166608	0.00838190938888284	0.0144390925061725	0.00361416080871301	0.0193903349325645	0.0110410684139298	0.0192846729221694	0.0194760162049072	0.0610623917473619	0.0139847765910388	0.000686997838645316	0.000122234701390963	0.0148340820069118	0.0258604860112342	0.00934957927845441	0.00737298466636479	0.00102791019809922	0.0187700667802686	0.0160185306912275	0.0318879645045397	0.00394826913414436	0.000728911435280156	0.0087369622168071	0.0233121291233759	0.0315522569433907	0.034965310926275	0.0259519805284874	0.00502574292069291	0.00021120300727731	0.0547585990773616	0.014409479929126	0.00484411552022197	0.0028242286483389	0.00244852655802693	0.000272724368190424	0.0182797110848514	0.0138886052330983	0.00158125314819727	0.0386919781409601
0.00950382046605047	0.00440893712642506	0.0104696264091173	0.000203985932656882	0.00794658178783537	0.000267691352503874	0.00509242333772339	0.000536272446286399	0.00251713826700121	0.000805296805000695	0.00151044181328952	0.00281562100705899	0.0087543472175656	0.0189813282688777	0.0192273712183962	0.0196917967105614	0.0232172321993245	0.0263566353472939	0.0199432033934532	0.0136846847127036	0.0122251731581379	0.00173549126841079	0.023836892145415	0.0123403526290302	0.0053435268330537	0.00303679525477316	1.71399147006381e-05	0.00864302748516911	0.000969249654140436	3.4170223410137e-05	0.00346388135969092	7.60120485578032e-05	9.80629718203143e-06	8.32109234573458e-05	0.00157319905160255	0.000114414316643761	0.00361867177912623	0.00589475748262352	0.00112961274321298	0.000550101922360957	0.0306352760565435	0.000266614954083068	0.0481562295227421	0.0065315418898478	0.00331457178978149	0.00371534506925709	7.34105210085819e-05	0.00785010805530445	0.0182271110182633	0.000411953677200918
0.00402926936442051	4.85437700791243e-05	0.011647418125803	0.000573255484159899	0.000810445162397868	0.0074248855885195	0.00557404956097851	0.00300792982636277	1.32260336294377e-06	0.010537428201732	0.00544340382705869	8.16510050552311e-05	0.000871875281362903	0.008340849232777	0.00248626332785358	0.000817524472990196	3.68793066750502e-06	9.28027000726481e-05	0.000378811572429354	0.00384193171357558	8.37604760134797e-05	0.000436550532477488	0.000826813041884571	0.000193156679105932	6.9917341477811e-05	0.00734158644496261	0.0204170039046622	0.00163132863335464	0.00446402766140942	0.0127498529671002	0.00552769767377978	0.0150496458474141	0.0178733058043593	0.0103747316945844	0.0184827144385007	0.0103442431752165	0.000384487396019122	0.00189063571986373	0.015285457113714	0.00906419244391344	0.00823124944154174	0.0219084511357266	0.0400569751471255	0.0254382885127236	0.000432433616683216	0.00977962807961484	0.00946176363851492	0.012657752154825	0.0313624786569049	0.00257884495862975
0.00342067237852014	0.0231806777492163	6.54842862043958e-07	0.00627047592527245	0.0288419613327124	0.0104485900565408	0.016276416008185	0.00764500830254769	0.0266394566159043	0.0126164610602001	0.00951360404175833	0.0599474926293365	0.0175063985707518	0.0238917732321803	0.0152362100970892	0.0146129378421248	0.0415892943655538	0.0386236956769441	0.0351715699676148	0.0879397761527961	0.028803691353873	0.028833195639198	0.0113334036760689	0.0454553812020027	0.0360444046810404	0.0465364714703037	0.00293737209739767	0.00228726142020447	0.00272719419416092	0.00690229564491953	3.77846475254488e-05	0.000247475545898156	0.00267636043359092	0.00292911122548335	0.00775086641450454	0.0151996833967208	0.033492536615905	0.0326791288905313	0.00207680523434792	0.000122024915120879	0.0121456991669387	0.00209925127133173	0.0260380059877512	0.00918151944084531	0.0108315786177837	0.00228075003950439	0.000643213757076217	0.0401169593034901	0.00469107194246514	0.0194426762978918
0.00765714323684445	0.00616166062770481	0.0187214185494715	0.00516899718591951	1.83569353367596e-05	0.00104697263424367	0.0228065100223196	0.011335433153747	0.0210754955246905	0.0234176673526903	0.00530674798996272	8.02164240093291e-05	0.0109260255581783	0.000584566719740988	0.00184253688424882	0.0063778355319702	0.00276591399989708	9.20982119818535e-06	0.00149031559082546	3.27624654640549e-06	0.0239319388195488	0.0029051220903558	7.23069698441631e-05	0.0194038933229791	0.00133268937887261	0.0326460729828302	0.00787699172846591	0.00035276666586695	0.00173821893380304	0.00106252478918473	0.000656205523727855	0.000427421463063787	0.00635034687351798	0.00113046293691671	0.0194002265963585	0.00428434217979379	0.00526557477372895	8.77201308444643e-06	0.00160504913880336	2.17917347892235e-05	0.0404989733578371	4.36992376596105e-06	0.0190426436505599	0.00475437802728604	0.0012609480237006	9.50969624671263e-06	0.0104594490906019	0.0220882384912592	0.0132518910605031	1.00886755187202e-06
0.000448885854813526	0.0270298978166188	0.0363952864756294	0.0087401161794683	0.0024290303942931	0.000794645399440303	0.032910406736113	0.0444169033658447	0.0186236743677001	0.0229714524523048	0.000638634372055726	0.00434646456399225	0.000602897510309744	0.00763627955677312	3.42448097138275e-05	0.00187668417627391	0.000244712115605548	0.00272821173373701	0.00330761963336929	0.0357497931391587	0.00540364222954987	0.00344554807555474	3.31663166760563e-07	0.00327031078676256	0.0152395646421909	0.0077225510118893	0.00434622539876265	0.0152770882400948	0.0188621557520298	0.0020689429565843	0.00487367251724634	0.0153810821035037	0.0172750577213629	0.00805242006503345	0.0100709294802415	0.0189430008136488	0.04950439480715	0.0420676312196537	0.00350871643303003	0.00306981350878789	0.0432016874860716	0.000536025615678241	4.39579109646659e-05	1.31213365536228e-05	0.00443162890160968	4.03727656997314e-05	0.0162973352213332	0.0229846015302143	3.79760074839845e-06	0.00019802138803154
8.90475266651035e-06	0.000625370606842272	0.0140156137924343	0.00896781145861408	0.000266255577745562	0.00181278397089263	0.0103720930149296	0.00347181490054374	7.34452325355858e-06	0.0150267185432588	6.31360053520648e-05	0.00886867414152942	6.64471898884538e-06	0.0188528958028689	0.000354028266647272	0.000907757308221174	0.0013102967721814	0.00406314594587838	0.0221196006250703	0.0367853402946752	0.00186690390629522	0.0396890346718586	0.00208626911897104	0.00596126142321354	0.0102528529519824	0.00856392425789927	0.0201208829403512	0.007191356870214	0.0158071755599595	0.00619572034778231	0.00387483404641605	0.0124143076270706	0.0243211621268423	0.0111940504120049	0.00476020115672186	0.0083169626816934	0.012014870451371	0.0365954335111111	0.0183698265906127	0.00311216508126441	0.0106910707922571	0.00134543762683789	0.00440105527865014	0.0103119660814052	0.000160451546910757	0.000538658720025189	0.00395691652017637	0.0146936046742307	0.000168791161379687	0.0101465782156917
0.000610013523996145	0.0179646157571955	0.0611125627904644	0.0170526253853406	0.00465755276918495	0.00243904179298126	0.0353729651868537	0.0629005077900324	0.0734771016635554	0.0369221875865374	0.0171123619036498	0.00214149217175866	0.0178962472209764	0.000938487215180174	0.00527473745656812	0.000663146750914413	1.76613127450856e-05	9.55658734182865e-05	0.00105540435635222	0.000595709470154106	0.000371371048333603	0.000704137386799212	0.0016002879747292	0.000568547745611995	0.00286234462161382	0.00233440225923661	0.000530076939878511	7.05200130880895e-07	0.000313093500514525	6.21042552870816e-05	0.000136608385571862	0.000524182205341804	0.000332425322451738	0.000204502160265039	0.000104886110957462	0.0165007941366078	0.00959340111327769	0.0026676702363076	0.00248402271205282	0.00447549360780942	0.039319951175325	0.014248645094555	0.0190327251932731	0.00836937303272072	0.0221460183969643	0.0119646898755866	1.33510625044678e-06	0.0271289657646233	0.0139284616950194	0.000320895707196814
0.00536880163403828	0.00183138061720975	0.0306530773137959	0.00875337349541538	0.0043038364085672	0.000201247608533107	0.0266584469680203	0.0365704316810618	0.0280315881566094	0.0200888687207049	0.000252846483128646	2.55563600712572e-05	0.00229189767913098	0.00142573187182464	0.000302235738443899	0.00036705642116133	0.000392428082918258	4.22794281427132e-06	0.00849942654540666	0.0110246942781308	0.00106345922446201	0.00174222272573552	0.0140778012477382	0.00173984794272105	0.00173342849308253	0.0103318195408382	0.0020093916466535	0.00034809162942625	0.00363848157460459	0.00834745471888493	0.000985806057277971	0.000530937346131919	0.000439091285436002	0.00442175731879951	0.00113815334381551	0.0117845981553871	0.0101065106456477	0.00124525761800254	0.000331096654037027	0.00759459358582033	0.023734801587174	0.00205324695110704	0.0219589730135243	0.00142959493185433	8.37977981550022e-05	0.00500515140735769	0.00174114946102063	0.0247278249896789	0.0134821312674035	0.00309770403687065
0.00739375712982621	0.011493016642898	3.38444339929109e-05	0.000570134823394436	0.00829139121854103	0.00352077807113714	0.0108660326655942	3.12649834649113e-05	0.00126744415835663	0.00674224279441848	0.000669792268894862	0.00708950145812478	0.00141364480001691	0.0152822560573966	0.00152865245681376	0.00293234201475632	0.00369443016189495	0.00109810186704827	0.013789817403175	0.00941429005704958	0.000184728032915674	0.0032688501175758	0.0374940550184162	0.000554053465417191	0.00543148205324044	0.0131160894712587	3.35154271981019e-05	0.00976884540614169	9.09658151763553e-05	4.74825156222512e-06	0.00355500679977994	0.000696799643261011	0.00095484093061733	7.74428676366512e-07	2.79526165349196e-05	0.00459515379697477	2.85161840385294e-07	6.21656589586453e-05	0.00168776092985517	0.0255487871212423	0.0371085716333999	0.000115107892532073	0.0900294243637428	8.68705331803715e-05	9.47764470537117e-05	0.000720938628537981	2.48911994146345e-05	0.00460600988551807	0.0286923687903827	0.00914883389986209
0.0163823791542974	0.00748877147990876	0.0060663935072552	0.0120432181454436	0.0312937625224961	0.0129674458295596	0.0018689223833033	0.00280473950861895	0.000212191371890688	5.51115344433842e-07	0.00189048118229143	0.0232203243990664	0.0047765946387167	0.0134292650637071	0.0030025176526916	0.00626094713057298	0.00458671125180465	0.0116825736880202	0.0388698580936029	0.0886360692592355	0.0406259700678432	0.0100750281547163	0.00447134173275649	0.0043964924913744	0.00430361002731662	0.0189889479886238	0.0181518843564841	0.00682298532689084	0.0150813673761684	0.0186680262654931	0.00566694287032963	0.000729971843722228	0.00951638382825578	0.0112292003211716	0.0266491457602722	0.0076725374096751	0.0443688712175876	0.0490685728620687	0.0120691104714331	3.3657365631706e-05	0.0527854167959648	0.0161278308409864	0.000289449088193378	7.49910429727039e-05	0.00109306635135842	0.000656031933408679	0.00332869587681522	0.0163734633804809	7.82015263289052e-07	0.0349521942889161
0.0204877829194412	0.0546365396604376	0.010541085927913	0.00381937108591454	0.0408484381236357	0.0333282743826053	1.63424873270402e-05	7.0558951396182e-05	0.00187213630514499	0.00689036615330607	0.000898003831932856	0.0126777844611515	0.0067879382321511	0.0268244910565126	0.00137387894954652	0.0206098494711435	0.00552514077140353	0.0170287636713525	0.0439490533665981	0.0579670081526306	0.0615408124053415	0.0154531394219816	0.00164248405015597	4.68245481366036e-05	0.000999365893157047	0.0154286460456711	0.0417310431187683	0.00720450078397246	0.0147914422903775	0.0148541211667785	0.0136735118037435	0.00057443546533481	0.00782158712184354	0.0191902190839663	0.000754034049394898	0.0422800685383553	0.0205774698798615	0.0273967551976506	0.00482552592153966	0.00957602091167186	0.00901983846714015	0.00835054489974312	0.0209559700045969	9.74435173038263e-05	0.00542625344981301	0.00118382724961509	0.000546620599867213	0.0111841180778699	0.00529043098741116	0.0576050601399029
0.00140524350634851	0.00133311230890338	0.000245992303135139	0.0123453547061232	0.0027097837598552	0.000530748392755527	0.00136127381757554	0.000429227912347458	0.00110293918180109	0.0013672655332553	0.00313154709754348	7.41874365728092e-06	0.00228828312551332	0.0286070073502974	0.0328264975416099	0.0378820160740598	0.0321584366890628	0.0307846477078827	0.0302067989538601	0.00462621252505298	0.00261054084958462	0.0031696156746274	0.00608682904951371	0.0140897777690927	0.00206184685362772	0.0483669863784096	0.0196034689721186	0.0133296827858716	0.00649196794728535	0.0232412393319173	0.0340914462145627	0.00899240996179636	0.00101628510668344	0.0579651709485005	0.0693539602534263	0.0200196286760822	0.00995985138788906	0.00179313248678267	0.0124945666794116	0.0246131154336766	0.117798920984071	6.87340734509e-05	0.000250414064949519	0.00367083252874566	0.00191340035154126	0.0125827056788549	0.0435493242718316	0.0321094508039565	0.012883806263812	0.00661861068199787
0.00324351807933763	0.000349666702360962	0.0186922179040174	0.000313494309948839	0.000322501318573391	0.0019243324824466	0.00374300711168244	0.00877422086354827	0.0164558655375491	0.0035639286083169	0.0009344927394139	0.00122225313531501	0.0033733852505998	0.00465016256266006	0.000694854238665932	0.00703351667764076	1.60020882469894e-05	0.000173950740309103	0.0136428948175178	0.0127602018544449	0.0340537839622678	0.0215990735271852	0.0146093562179313	0.00444438427119905	0.00136837189345903	0.00160424870066763	0.0321097054958762	0.0188694870099437	0.00147392097683236	0.000356209533936091	0.00795587095764126	0.00241631659036488	2.86258150700967e-05	0.00086881136968909	0.0391045681097792	0.0140609365067351	0.000736967506390689	0.0133810236484661	0.000364340260361205	0.00139020356320399	0.00839993359043995	0.00155395332675379	0.0227071944496924	0.0253153494435341	0.00745580786258951	0.0157647603263042	0.00532569238181979	0.00676489945212015	0.00282155585349701	0.023293947445218
0.0558036806403444	0.0639959571303866	0.00445705905890393	0.00571482394837921	0.0313023565705037	0.00352777382863869	3.55319280029903e-06	0.000259033707590566	4.79893141247302e-06	0.00192321028223777	0.015831290659165	0.0206486750375233	0.00327631752649558	0.0484998343527522	0.0133310532581958	0.0236798830617237	0.0358322477596923	0.0277972085486134	0.0627110355115762	0.0375503349815557	0.0319655772766466	0.0184991343289924	0.00426155948672956	0.0303602450980367	0.00385394390387216	0.0333908894797039	0.0202265240857821	0.00441558477646605	0.00749524607325198	0.00298654978824641	0.0100832796204653	1.16566793292813e-05	0.000773339702357243	0.00392032110942295	0.0159997555812003	0.0330315104679063	0.00772436488579131	0.0202198985925205	0.001797198802361	0.000162519786464843	0.0649372636640706	5.5357678816231e-05	0.00951357395080904	0.0044159822320928	0.00142177261530449	5.18195487597489e-06	0.00278593824735569	0.0182217822484984	0.00679240292030768	0.0242991273675231
0.000519139519625003	0.0157679967632043	0.00188340167654103	0.00940550524159679	0.0157410146748129	0.000252508307218934	0.00787054622510369	0.00668375790330662	0.00573266657790437	0.0169395634955552	7.91565318253535e-05	2.40930791485101e-07	0.000300158579926294	0.0442912350598078	0.00986484650781103	0.00708253278096893	0.0201950454995748	0.0119101275210583	0.0585182456894919	0.00769545425877706	0.0268955479200682	0.0224347340691938	0.00100485795671746	0.00548227222349058	0.00211186254299803	0.0154186703752123	0.0504597852476724	0.00830121232464801	0.0114511161833339	7.45715620282675e-05	0.00269592375431352	7.00722110781839e-06	9.33759689605873e-05	0.00447707876278435	0.000440585506476077	0.00919859531235207	0.00211054572292212	0.00797565618438134	0.00162948367706556	0.00255791365352745	0.0282701754205349	0.000660771345084769	0.0344049828969268	0.00158999531328691	0.00242568782023254	0.00217381845613571	0.00524428512309217	0.0128784039997595	0.00890419783709093	0.00300515733051882
0.000266073000737376	0.0209355337190801	0.00409928104073919	5.63678221203379e-05	0.00756224095657464	4.78000683432902e-05	0.00463082285725748	3.91239206013461e-06	0.000574403103403696	0.0142277056314831	0.00125831395411295	0.00106962334921226	0.0165014846355429	0.0488369097746944	0.0528245709290092	0.00183526526909088	0.0356021919969951	0.0203153999811219	0.0845628394904157	0.0124108982072154	0.0340771709812097	0.0341245509735708	0.00804323679075026	0.00587792803195802	0.000160989701904754	0.0112925671944193	0.0453590272150964	0.00100407484625029	5.8350886589627e-05	0.000782595524273376	0.000634610235411731	0.000243956165925641	8.62947223266948e-05	0.000828704194742591	0.01416680559704	0.00864304698128972	0.0118176875829688	0.0108334945151729	0.000875549283138946	0.00365929819173941	0.0610796135313175	0.000740275882137855	0.0464811287241835	0.00385150163571584	1.58459219086809e-07	0.000677142761466129	0.000899108656204767	0.00453812733023244	0.00669213336575211	0.000650824905835589
0.0140971672873864	0.0203939735215014	0.0120543187739267	0.00867503614410185	0.00343455198465168	0.00172867110177023	0.0110011855510518	0.0393121351853011	0.0217506662918665	0.00265502083356538	0.00909369641792549	0.0130123289155787	0.064715200577002	0.0277667878280188	0.0109185382379001	0.00349331169123395	0.0369985445762366	0.00814699148993398	0.00264396800917931	0.0010558525300826	0.00232222594099366	0.000254353224027845	0.0208967044567755	0.0161261016541792	0.00135682493485653	0.003407292466535	0.032658369778467	2.28625500609444e-05	0.0296810320665381	0.0771106159109219	0.0713067817317217	0.0715616984528673	0.0510826415792922	0.0446085878088297	0.00823074525327224	0.0142081106570188	0.00172592362554042	0.00017382662032412	0.0775849303744157	9.64943563668122e-05	0.00541029143273042	0.0109592535666984	0.00360206489437643	2.78714992157253e-05	0.0432038032571679	0.0605151908597291	0.04925360214165	0.000476368912557168	0.102166746150775	0.00479444776365248
0.0562121066802609	0.0261907332623339	0.0616305387271336	0.0377493309071843	0.0312284699998181	0.0310228426287677	3.62911356910368e-05	6.84410559383856e-05	0.00623030233898317	0.0122446306354557	0.0196178790336948	0.0416658331594234	0.0292829346783158	0.00695098977727518	0.00416398662048546	0.0331199129839186	0.00338318873712599	0.0151959305333925	0.000300407123411082	0.0255023023116104	0.00806133739144196	0.00479213394913845	0.0252006546947367	0.00156948529576113	0.00339861456316614	0.00610540211658308	0.00312273735110173	0.040787096061652	0.0150192325373152	0.0149761060135475	0.0227297286079974	2.10273608414625e-05	0.00075881113556458	0.000590110335455786	0.0218056902509621	0.0463126432705904	0.0407913047629591	0.0333712120543615	0.00268222955350606	0.0144646460515212	0.0120721356478752	0.0180894574618016	0.010073441620804	0.0787377151003559	0.00965434761481679	0.00020779659732511	0.0109503613946959	0.00137705187028019	0.000360243343008728	0.0612622668490096
0.0180304274028495	0.00146800347474369	0.0212595901808331	0.0616473193319783	0.0259124570634482	0.000879055362071735	9.30254354228226e-06	0.00310180354132028	0.000400015993179146	0.00139214206807479	0.0141608932748285	0.0107782557176743	0.0332157186748039	0.0018991291686362	0.00351083333188304	0.0198076063447902	0.00112646656753217	0.0195778392785109	0.00331223189287384	0.0102962965264087	0.00920469790783779	0.0223498065282406	0.00907917553315214	0.000374888518455912	0.00241104754968927	0.00483858088790482	0.0178645963856079	0.0147960716153239	9.55327248340236e-05	0.00175493998538988	0.00510468162639742	0.0181794720147691	0.00453270161275518	0.00433210234657219	0.0215936745487774	2.56983825666386e-06	3.6856541065587e-05	0.00101594085007264	0.00754932902632706	9.22817696852446e-05	0.0199385545234527	0.00266345560663288	0.00415326956800136	0.0137927659081774	0.00120890388375683	0.0298504015605978	0.000294034212229286	0.00680168128165432	0.0147190628055444	0.0198832759254138
0.000755882940558307	0.00530844224957015	0.0105713296041575	0.040555427182672	0.00240546178183098	0.00104377751511506	0.000477770436659282	9.12665642864892e-05	0.000306714689637694	0.00148925539399685	0.000505607456469111	0.00128479955208062	0.00413026344905764	0.0309205282973024	0.0134459296502001	0.00325046238900441	0.018632611197716	7.50085089456657e-05	0.0140597310333681	0.000450354088775907	0.0105175345891646	0.000401245965544543	0.00175880058001107	0.0671689502916542	0.0282044671762238	0.00867716051063442	0.0437310046082056	0.00540724179371442	0.0167521338938452	0.0145220171914913	0.00124596354533666	0.0672740331699934	0.0546161813402426	0.0354097326771431	0.0025345777091478	0.00157072668327472	0.00075724716782888	0.000580988211604699	0.041072566511292	0.0082678704683735	0.00019345150392303	2.37888025067094e-06	0.0010278416167689	0.0028188171362232	0.0035976492074118	0.0936837346509725	0.0134721191719181	0.00977040442575239	0.0464354692692097	0.00435423979626379
0.00130502502337423	0.00684943127118801	0.0220733366087643	0.00439301412948771	0.0160645116831947	0.00408779673056458	0.00256316476486645	0.000772146359989705	0.00279032872232398	0.0175082528816397	0.0092509097511341	0.00399528902394329	0.00176794971957765	0.00992335554121732	0.00176861436949858	0.00432407453689689	0.00569469803800927	0.000666410400338344	0.0109305675999907	0.00409324058940874	0.000808298853826421	0.000254550650153323	0.00106263382958505	0.000706672348476118	0.00949614626715146	0.00148598201735525	0.0087539124273697	0.000125607663568963	0.00268523171212436	0.0042725361391921	0.000759777749909836	0.00525162285088451	0.000140710703079554	0.000385139635028766	0.0102451055808351	0.00933890404339618	0.02139789200206	0.000449462888253265	0.00110829650106632	0.00707572759838313	0.0301331237764272	0.000227899430627908	0.00123832192615752	5.3700762599058e-05	0.0386514716519725	0.00250928816914769	0.0177760983216172	0.0048594105824038	0.00257357834793356	0.00188245118885143
0.00539855183899423	0.000286534785963214	0.0186203466814829	0.0116824020243686	0.0408151861978377	0.00501963795747037	0.0214350067323741	0.0411187147069496	0.0208367753963732	0.0126909622772634	0.0241042417316311	0.0624696066033917	0.0511779831803525	0.00157642673377077	0.00182843306602702	0.00201999624864635	0.00852197524220083	9.87025114014616e-05	0.00836756313221485	0.0157484649519757	0.00458512158073047	0.011774404349725	0.0693350454283687	0.00335342129753555	0.0237964879779427	0.0166950497514712	0.000584023702609164	0.00623907012882413	0.000312732700719016	0.0120401973594344	0.00895083008477969	0.000923361353033113	0.0122094144298216	0.0328618852406151	0.000222709779878372	0.00667181043285508	0.0147006024374334	0.00343817718700391	0.0354374059680242	0.0028468928738701	0.000249869025597872	0.000657934287789721	0.00139051923465568	0.00590851602613571	0.000217988898641782	0.000286482724543227	9.15944373419588e-05	1.72069043304765e-05	0.020687371002026	0.0186700505339803
0.0251300037231808	0.00551400018833118	0.0974283905169339	0.0479765686305102	0.0276624398479835	0.00766795207825974	0.0603548609901795	0.0366882579484996	0.00422034432289928	0.00461310382147151	0.0220290799585908	0.0744647946227251	0.0125255597686816	0.0162916369057371	0.00164149676917495	0.0608567309087458	0.0088520884389929	0.00960974838731866	1.23315417754687e-05	0.0244620731605409	0.00186980762400966	0.0037098335113364	0.0594740911293766	0.0197477278118351	0.0455511716169548	0.0222289343908448	0.000759071132341687	0.00726541547783337	0.00444481826621911	0.00762161963574901	0.00621631635173283	0.0133173521125328	7.15588168968675e-06	0.00972185061847825	0.0612462479929366	0.000347191960119023	0.000131643473328528	0.00551099608357989	0.0130280788785818	0.0303342607974936	0.00904687143253565	0.0146823756917109	0.00385026336323273	0.00374778074026391	3.3346016802911e-07	0.0126177194529248	0.00344443566299766	0.00214069041241321	0.00276488000274797	0.0534288186230138
0.0155199585042067	0.00120529273186803	0.0635656579932332	0.0139482537907449	0.0148638574606394	0.0453833115004134	0.020661591170539	0.0584589346297358	0.0462027174468491	0.048791768505591	0.0494400095218458	0.0827030438054503	0.0606975573125199	0.000102480810019246	0.00492627382030187	0.0326270489955305	0.00219483161892625	0.00178555205478402	0.0143945093608921	0.0280321298280479	0.00904344887027195	0.0147696399776105	0.0795391682913485	0.0147082823166252	0.0217040970991494	0.0303028349121395	0.00160452268684833	0.00910320491165012	0.00215016543363849	0.0315760289854846	0.00708897221536078	0.0187545493153976	0.000960527811048293	3.38276943212131e-06	0.00814133224732199	0.0422266814610667	0.041244730912945	0.0334959130388729	0.00163634747870144	0.0741459061667128	0.0327047137016687	0.0205049165060302	0.0297796888895046	0.0296649461780294	0.0345314802703531	0.0680195363874894	0.0574713455444993	0.00812559613044317	0.0369810210242453	0.0274406159548715
0.00261358665634502	0.000136384624678301	0.0205091477607392	0.0352471235967629	0.00076127257261843	0.0679091155058209	0.0320832462745429	0.0249386238388574	0.016515532199562	0.0465503078568716	0.0113603465832619	0.00634720290678595	0.0297833455809474	0.0273354930716378	0.0261384460259736	0.0135581434268296	0.0369959674134961	0.0250749948220951	0.00149068731306806	0.00203679911949716	0.00553675232308372	0.0022158747485782	0.0121506189323897	0.000311336636024133	0.00676898595864109	0.00188032623176878	0.00942634115215336	0.000290396306946126	0.0108243275348827	0.00352577068839889	0.0259439242347337	0.00572659699176985	0.030350526767633	0.0337678683508693	0.0214822551259115	0.00861857824164148	0.0158602161334794	1.86938384288475e-05	0.0165196812238683	0.00993518117259403	0.00145975113831387	0.000404749110509329	9.67761465102508e-05	0.0223616751554794	0.00715957614571176	0.000304767186758406	6.33730892118651e-05	0.00765234588986854	0.00805599009396109	3.53942089504491e-06
0.00307731505324583	0.00472979712788712	0.0446587282357796	2.77850786768116e-05	0.000162997816531427	0.0191912091224412	0.000245149004558689	0.00439699948311273	0.00213739765020625	0.0400865555398879	0.00312293533071259	0.0296032076416428	0.0138223836077901	0.000453394349280605	0.0103691092279477	0.0103331881230606	0.0101101862884873	0.0140771537421134	0.00127474436228829	0.0102226508238955	0.000270341603981458	0.00105463903645375	0.00716701370863238	0.0152433397072954	0.000252085905271658	0.000518493781201869	0.0100392597540988	0.0041345304824711	0.000300773660775161	0.00254302150416273	0.00851448941768574	0.00117202277022264	0.00275747821091346	0.0229502990006449	0.00112032658479072	0.010214175562798	0.011528260054126	0.00412305720585122	0.0089198423283264	0.00660812602004749	0.000777802197553517	0.0070254103747605	0.00271434461749867	0.0211742102429008	0.00248937154677444	0.00890946936675584	0.00149695712777435	0.00179675930452826	0.018018000063413	0.0107275960823012
0.00642627386734198	0.00910694865393879	0.0165590537329023	0.00239270136416355	0.000757558390263994	0.0186703629169961	0.0283319816513511	0.0345897124466755	0.00561125496800133	0.00367896429421011	0.00314816494858346	0.00663597454125918	0.00371327713485697	0.00542541433769445	0.0391592439026651	0.0102421025650585	0.00747767166612329	0.0251480008861479	0.0224781916802116	0.00531042531883446	0.0333784842899359	0.00300867606326834	1.81703048990304e-05	0.00216931573834367	7.13184674135954e-05	2.69909606880894e-06	0.00547388137896928	2.72217686594802e-08	3.0221254787442e-05	0.00777400080242254	0.0107470209571659	0.000956884904335857	0.00317936818278196	0.0189997037601706	0.00516784478910306	0.000598845734071308	0.00121908071432455	0.0074250064593027	0.0129045752959899	0.00470298691276552	0.000973265169976868	0.00458287041922913	0.0163528386848526	0.0109993762272095	0.00579009560622404	0.0157638118410364	0.00131765301430151	0.00582528300825058	0.00754866972811728	0.00966852543037613
0.0194720189360849	0.00197295636223473	0.00137329988309716	0.00693716750670421	0.0271205910729958	0.0562249691149751	0.0371159792123806	0.0208404794572988	0.00528257640495504	0.00354763314762602	0.00432663205202716	0.0308531340190445	4.173259389918e-08	0.0388063175285488	0.0133850721671563	0.0430992063434821	0.00447852911751558	0.0079228605547818	0.00772298963027009	0.0387792496453848	0.0200073986664265	0.000451920175170789	0.000733236875221836	0.0241803359580898	0.0169754560647665	0.00522979360429179	0.00637211838359342	3.1427155781454e-06	0.0619595365977175	0.0619846102984614	0.0272149764220755	0.0660948495790654	0.0390098924748294	0.0419994107000897	0.0978199594564953	0.0310887168974406	0.0268662155880546	0.0283107420766158	0.0645027366796011	0.0228160260508478	0.0180360883877751	0.0261003887368967	0.0524130202323537	0.00291204920892188	0.00268964082396529	0.0310100658427282	0.0252155136809357	9.5943323391601e-05	0.101571347214231	0.00434426891786291
0.0122070861012613	0.080565420992003	0.128094561113504	0.00181855205939716	0.0240390716135491	0.00273342878880926	0.00836517503737188	0.00215824325491961	0.00444102673370243	0.00676404424977556	0.00825375863109412	0.00660161642611592	0.0132578003166514	0.0314838433130533	0.0815295040682315	0.00203906201749547	0.0398036541725747	0.0747841295139995	0.0431896164942258	0.0233697187012605	0.0664488534133451	0.0256456323755077	0.00741909711177397	0.0127404816297802	0.0423723834485773	0.0125802637107097	0.049597472043311	0.0360181701708282	0.0473170791131098	0.0439158342490435	0.0696060740449191	0.0266534976196205	0.0356354825426495	0.113121601489961	0.0188787277819269	0.00787987235057749	0.0190503522090325	0.0253786729342333	0.0854835014764666	0.000965160030648598	0.015532860416694	0.0032507793369578	0.0167917697572584	0.000519042143863263	0.0272015727760635	0.00799324643802587	0.0181913491238638	0.000715461316697846	0.0499608928081269	5.44146750604949e-05
0.0217972263726937	0.079454938446279	0.103009800463916	0.00286586146668374	0.0194628598746097	0.0369148048752408	0.0123496437242239	0.00203007661888048	0.0256964100609912	0.0422786131433654	8.58594782013663e-05	0.0155191720559634	0.00892854019924921	0.00807185933531187	0.0389128115221851	0.0200198516054455	0.0213383674905897	0.0472264718506716	0.0376240576922675	0.00744916272916751	0.0475632383687347	0.034538907472771	0.00441004958245411	3.06892374241995e-05	0.028914175293729	0.0102496289925091	0.0246830368126145	0.0259844881241222	0.00420690083934223	0.0319152151192263	0.0518284813716398	0.0474946117057372	0.0268645609178132	0.0902288812877758	0.00272244153583045	3.55165658489327e-05	0.00605474191884485	0.0218537048077743	0.0673351141235754	0.00758147902501547	0.0188070001639075	0.00963873169937487	0.06865974492561	0.00889479785802053	0.0511247186987143	0.0140721782900605	0.0572754538750299	4.62160002860484e-06	0.0938427236095776	0.00712098233794968
9.85514205148331e-05	0.0280201285022833	0.0308092224822356	0.00281408079168404	0.0120144300920791	0.00111691241237288	0.00298005864926737	4.10014408374011e-05	0.000346912505918585	0.00686100028154916	0.00976188893065725	0.00447596002243004	0.000130919629987087	0.0422048859607864	0.0448454840149227	0.000887503099575277	0.111753810012854	0.110986382297948	0.0217299002671199	0.00683648807943197	0.0169236387976124	0.0279408589076386	4.51648132582364e-05	0.0278276770277141	0.0801791865168553	0.0185628605430159	0.0168277337148837	0.026148781647919	0.0244467066495087	0.00707794812493209	0.0241172810572759	0.0349333787025333	0.0238501539872748	0.0548029009192988	0.00809951987176981	0.00684516572858139	0.00119655681174005	0.010605314588974	0.0490281423966026	0.0257129169806902	0.0137016254709231	0.00122457746130501	0.0270325916630319	0.00171208111203291	0.043070612149645	0.0303381906351699	0.0272584155262368	0.00407276531640189	0.0954409318028914	0.0030989344027775
0.0361074337648722	0.0788981035995822	0.0765960684580445	0.00560484068210071	0.0160924066536798	4.11252182544079e-05	0.00353200695129858	0.0031718103446429	0.00562200930502106	0.0389779814877073	0.00471194013803103	0.00101829252938623	0.00682146559112402	0.00520400913772119	0.0103544773185688	0.00321470603431284	0.0173207726317276	0.0209904904268332	0.00153606940525844	0.0256892321634862	0.00858349212727342	0.0131788568399398	0.000417647223877811	0.00759763742590099	0.0203025793740136	0.00478380944716715	0.00880561565842737	0.0100768229977678	0.0102837534831088	0.0491056655440936	0.0415059404914764	0.0880779039406497	0.0635390144305792	0.0569113148665141	0.0271456134730836	0.0132308297504913	0.00382026889533457	0.00660410844220337	0.0999420165865159	0.0308546331868679	0.0714074694318447	0.0322764201475253	0.0248281582661943	1.0997155533593e-05	0.03424325374387	0.0337495872862952	0.0525797997923897	0.000542089259202271	0.0832638809848833	0.00432679336054702
0.0562384257358985	0.0997471219240623	0.0564617890958573	0.0343159691124099	7.73270650881654e-05	0.0540095198621381	0.0270265328820369	0.0664133667643144	0.0864061229519762	0.127192143335858	0.00938166587322627	0.0142026063885884	0.0200990992317499	0.00311023381142177	0.000321601484099746	0.0114738157820397	0.00993423825741457	0.00212440269636472	0.0011543163046463	0.00138485645674505	0.00582193977835721	0.00127721603192376	0.0223447669015584	0.00010277064343173	1.22614320867401e-05	0.00405711592096055	0.000806778809266749	0.000263114229533715	0.00401027633902048	9.1724906632341e-05	7.87845295925365e-05	0.00249139772638753	0.000101993702828693	0.000851873142208768	0.0149865380611091	0.0229706347891127	0.0132418603987571	0.00133957315492878	5.94339001830843e-05	0.0128281260740431	7.73676980049202e-06	0.000654191478130093	0.000350605668691678	0.00317747078897493	0.0145331777933607	0.0041693038489002	0.00121294700149864	0.00260094981998594	0.0104692641950999	0.0163549964771953
0.0196617192508359	0.0609559539790018	0.0305913872316982	7.24444314609192e-05	0.0186702847444717	0.00330415636709939	0.00103003562837607	0.014694046318985	0.0204857496374331	0.0365972371016412	0.00968608380678482	0.00119864952645186	0.0170923357889375	0.000918714187777337	0.0111625255481948	0.000986183564411678	0.0274704926035448	0.0156288630453446	0.00399988694093439	0.00146737691330396	0.00121741413806696	0.0161344940575079	0.013404757068418	0.000137115646965402	0.00165926764249423	0.0198914100189103	0.000787482887401745	0.000999353375386283	0.000135271243253712	0.00498846580100484	0.0211775150221831	0.0383262477617226	0.00893129648579246	0.0207254157708994	0.000164054328656982	0.00592872323213257	0.00220144286844852	0.000140960220935832	0.00959934457440528	0.00157596483261094	0.00780545723011514	0.0202374896236071	4.64603260809352e-05	0.0107026772464705	0.00972261628450936	0.0175958689802732	0.0148711961924984	0.00170040669798366	0.0259161388370202	8.04479561104019e-06
0.0637760958204696	0.0525380637075675	0.094101944938402	0.00124068082272484	0.00340001801532149	0.0167234059168825	0.00519456464598356	0.0232746253767142	0.0269436913427604	0.0356978936367883	0.00710381516469407	0.0687285032782099	0.0250792308803964	0.0254116361309701	0.000500186403299387	0.14934652509381	8.38068600238717e-05	2.02771049919052e-05	0.00040797715881908	0.00215140787965985	0.00424552650481426	0.00109063007764276	0.00394784065409365	0.0102455451260175	0.00808690564517804	0.00677926990878727	0.000507637573720982	0.0011953696648519	0.0408228835070316	0.00195072517520246	0.00123010576831533	0.000109466868771005	3.26751608372227e-05	0.0028084519321258	0.000304291556188921	0.0243069349729541	0.0276742091850228	0.00101470000242592	0.000754666512281391	0.0107283077696024	0.00554981554256124	0.00464127500007052	0.0118439108815729	0.0457888743651557	0.0151675472080312	0.000181126386130812	1.42083019254932e-05	0.000625002992888963	0.00181766723985444	0.0937864401908354
0.0390327853331969	0.0674826901477317	0.0697496860691826	0.0104893205917727	0.00413515933301029	0.0437261631447468	0.000946215802055875	0.0206460773651675	0.0161431835314242	0.0643201666993665	0.0134849985267537	0.0450119825650677	0.047603394835673	0.000509055312957967	0.0738880351810109	0.054909016902954	0.0322700155608505	0.0497317356686802	0.0186065572310476	0.00024043200432143	0.0228557678110613	0.0317581060679412	0.0409448104434327	0.0151236032729684	2.76245739820871e-06	0.00219716180864757	0.000926336536071266	0.0035614600961807	0.0237218126812745	1.19604742099641e-05	0.00499766459153246	0.000791546875780715	0.000170948922226618	0.0070178379988431	0.00429004341543009	0.0323820880471873	0.00976994917819419	0.000416947436851496	0.000214422329531472	0.0125900310665397	0.00174382478953141	0.000708136261634947	0.00926757175289614	0.0217408266465318	0.00186491380467936	0.0130082711646672	7.92899315329071e-05	0.00136390494044362	0.00105756541764839	0.0417373986809186
0.0141688467324842	0.0408169025038581	0.00950537505942927	0.0319362098005413	0.029228028504165	0.00804531231945175	0.00952022896402348	0.00239328129311471	0.00947216355269826	0.0167865915859775	0.000167909387059954	0.0205500863376121	0.00153561018760525	4.01694981568033e-05	0.0339750539752838	0.00254171600648146	0.0517983076905619	0.0231994152735962	3.81063440050107e-05	0.00476066395940963	1.26550256957964e-05	0.0111402430898849	0.00326010174204586	0.00209943949227597	0.00412000864696392	0.00372410975667239	0.000661124614063133	0.00140516485227095	0.000590057905295304	0.00131795111863451	0.00286652277396081	0.00807894106519087	0.00150869961897079	0.00771739722725945	0.00414565636157888	0.000765161929857724	0.0106106712152089	5.05203385680394e-06	0.0101729551470151	0.00035021642054441	0.0209610830232951	8.18234363116236e-06	0.0151674885786478	0.0217208557324452	0.0158065877539358	1.25495773904663e-05	0.00383889971907631	0.000727115095352941	0.00527234651988598	0.00323679334107919
0.00651415652986637	0.0394946462161115	0.0135180063302079	0.000169413402023174	0.0206217909547124	0.000807959754587308	0.000228089634241896	0.00310188912060182	0.00222774228042933	0.0207877732943967	0.0143867711627363	0.021341925598378	0.0298489610622968	0.0119706917502692	0.0271759426898145	0.0031552474692681	0.0193226040293087	0.0308153192416129	0.0497398675656453	0.0281058077840881	0.0852449942930024	0.0625355303558661	0.00692336184734968	0.0095244622400243	0.03242744017477	0.00213597617540357	0.0117905365082756	2.89183130077723e-05	4.65928067996884e-05	0.00202688405051678	0.000611053036523216	1.60924528199028e-08	0.00293982916889214	0.000399786821297861	0.00521941329047657	0.0124531380997939	0.0391300304828144	0.0273979296466015	0.00074606303096997	0.0317851211237246	0.00290279555486496	0.00173338345957673	0.0427626957314851	0.0334151970723877	0.00017958830024314	3.90859327981701e-05	0.000147847099860261	1.50276910039376e-05	0.0013608171093995	0.0957187765235646
0.000248613076800905	0.000299078823090706	0.00152983503845647	0.00689487912104295	0.0416372543382294	0.0199255998235993	0.011276834447713	0.000303694331130073	0.00833283485598248	0.00308298709152115	0.00284315909513801	0.000101217336549523	0.0392080859051103	0.00677461932943849	0.00620018837031934	0.00856574968591317	0.00574707060148399	0.00781383232856278	0.000423743081777125	0.000845061684474218	0.00659593291712062	0.00123877612171268	0.00179683623177894	0.0237375148241046	0.000157606393400138	0.0124171034249462	0.000133603686990641	0.00218189731190132	0.0100257949473554	0.058609863216999	0.0501621896920766	0.0683640438639511	0.0197464047458289	0.0203043078304606	0.0268832414822713	0.0403085516538091	0.0173879049828622	0.0019837325605384	0.0231987160704363	0.12138134817545	0.00157618166917715	0.0592304636446698	0.0927926499965664	0.0699258764728982	0.0530838703912103	0.137749322999647	0.0782307432059466	0.0164652047414897	0.100630067617402	0.0138519914826388
0.00770416412760262	7.66474781412181e-05	6.79304425223673e-06	0.00912740889655905	0.00302555848763898	0.00494152778565466	0.0142649685488419	0.00437811421132933	0.000504665643686215	0.00130926942047308	0.00159634822230133	0.0016760520414954	0.0110123083170119	0.00728893283364348	0.0161653608074731	0.00439649986388612	0.00285556606990508	1.08985231479118e-06	0.0367824063547564	0.0106693731986483	0.00170453005877208	0.00122535064847695	0.0105815936324045	0.033788354856522	0.0355954844006256	6.14262846796068e-05	7.51848162400456e-05	0.00664424826004541	0.000321298231362038	0.00958748123491784	0.00970319066030097	0.00558846837922484	0.00705197947908537	0.00629670597071431	0.00699741281919259	0.00555380424989192	0.00537908101168209	0.0123014753768804	0.0272316047899579	0.0299402801191066	6.41193011943028e-05	0.000709649456416333	0.0336730697208941	0.0296672382097441	0.0199987459542565	0.0645541329988518	0.0150931616762419	0.00030682750475858	0.0310898908889433	0.00063761471593631
0.0409840411357053	0.0571344660185103	0.0156826049677596	0.00046006110490555	7.22749621432034e-05	0.00120337791368524	0.00422443491737757	0.00822278442479748	0.00121613661586597	0.000259528421171062	0.000467436482130644	0.0120460121773675	0.00586063091551004	0.015882213741128	0.0158594952644004	0.0121212655123764	0.00110255166386009	0.000116561778247039	0.00636122963042063	0.0237530615496353	0.00103487236307136	0.0019648307786894	0.00554490635087874	0.00882763197842398	0.0163801123490109	0.0160731463694	0.0120353457678239	0.000609972117574102	0.00092212592972259	0.00696107020657549	0.0136573045221892	0.00395488377947839	0.00887864054902891	0.00425153655267274	0.00128065992139557	0.0095755483978727	0.00824494183560453	0.00830703132212728	0.0115100693304938	0.00309821814151368	0.0106637354386556	0.0109839376296301	0.00744968375629451	0.024994618454952	0.000225892349109216	4.80564424123108e-06	0.000939616338911319	0.00904237310931157	0.00207305838883568	0.000330660933545907
0.0037303283228779	0.011860785169372	8.89131670054446e-08	0.0202539297534658	0.0113973988103261	0.0256561176821192	0.0419100804257899	0.00312556200552019	0.0279586670978064	0.0291999307356445	0.0188192882983801	0.00995115747412501	0.0644435137216029	3.44271966207018e-05	0.000191134350361186	0.00396715711537683	0.00474492959963504	0.000840693009665909	0.000976063373406666	0.0152626509058027	0.0033151312700193	0.00258893984693181	6.62394682089054e-06	0.000123766194909249	1.63686018128554e-05	0.00350681636883084	5.45840806410135e-05	3.14628532093606e-06	8.20341924683436e-05	0.0134474548070377	0.0331561040658976	0.00195999271909476	0.0107195560255655	0.00835400844536944	0.00179427486604079	0.00189777921084584	0.00476144194531311	0.0127015472629413	0.0225885875501842	0.0213157795660852	0.000528443125347216	0.00867189495625066	0.0425859930258855	0.0251175525388577	0.0280785857789582	0.0339944359903758	0.0129888937395575	0.00103061390536625	0.0459081782199941	0.00170329428416906
0.0131770140479389	0.00139328532372603	0.033260072012338	0.0096022634847388	0.0100555940754477	0.0317940538008562	0.024733546319024	0.00175141376182945	0.000977204928913977	0.00679306276841592	0.00482010911753023	0.00375322652234877	0.0295262525662797	0.00291426743817741	0.00423226068779302	0.0169457036764028	0.000606443566565843	0.0017896294774223	0.00099794377388751	0.0089114845407282	0.00955243638466991	1.80645860103094e-06	0.00242616783031192	0.00186205543222957	0.0172911980910737	0.0345872086929874	0.0129247566741268	0.00436585870189461	0.000190911674392415	0.00876997821013755	0.00333330153470195	8.51089531031591e-05	0.000939696429561949	0.00570137420532368	0.000839801535438834	2.76791045216666e-05	0.000312767500576477	0.0223290992375642	0.00120800478496504	0.00335144622848352	0.0150347698554975	0.0455797286961204	0.0059955300229996	0.0170220977207341	0.0268238913951778	0.0521533445055715	0.000746275188911554	0.00357210762393792	0.014170346353328	0.00125303690494859
0.0106755441385954	0.0229052518599149	0.0201336572835168	0.000181857796987881	0.00173617966789654	0.0381756355566467	0.0024059571578678	5.6318004607222e-05	0.0353287881442024	0.00588176384928693	0.00135586982276902	0.00245253110165565	0.00784838264425149	0.00266176722748713	0.0144222110739682	0.010335257638311	0.0389114097321117	0.0258192259558959	0.0138018401583656	0.0306982973943884	0.00361082270842311	0.00255147452314319	0.000305594411195401	0.0136181975254154	0.0269691111637966	0.00114104480061156	0.00564897054673368	0.0187674999398174	0.00463887260085749	0.0119987463145353	0.00846115698001251	0.0463834727816332	0.0283089948454231	0.026335573823879	0.0529557600740768	0.000582933434718255	0.00255684456580095	0.00819748193339747	0.0840989901434335	0.00757359072415957	0.0336123168049725	0.00275554967490639	0.00413670882295409	0.000324440741626242	0.000153582058096979	0.00690277714013976	0.00712002015561563	0.001351514294883	0.0165832366716078	0.00237633130389225
1.71422032121343e-05	0.000324741135575512	0.00848762312737219	0.00280484202405705	0.00689994012643982	0.00409878055192724	0.00318917697005583	0.00100198493118944	0.0285663266591157	0.0151372832067451	0.00614419845119237	0.0394022008305931	7.08095372420455e-05	0.000395119283697733	0.01608340851083	0.00819166122419676	0.00836097181382237	3.46645241674261e-05	0.0145819101802184	0.00892215302930443	0.00264367997770647	0.0221761855783402	0.00706737065376016	0.0712613764679738	0.00314655955988203	0.00403543966885546	0.00202322654916954	0.00532303783474985	0.00166635127018032	0.00655531298720287	0.000544014390189957	0.00695000084121954	0.00129265764393776	0.000104415171844517	0.00352519391270502	0.00186373569830133	1.05129149904178e-05	0.00987060500065349	0.0160822681609464	0.00639212364290158	0.0316654429925967	0.0284383981291095	0.0122296894128701	0.00776226518819594	0.018288330132267	0.0829363149091674	0.00751540845614765	0.000911819700377969	0.0113376530662192	0.0124344431209271
0.0265310555260895	0.0156837254074386	0.0182052278111215	0.0142666803449289	0.0236576169870371	0.0684633321127643	0.0324891298330596	0.00752088831445659	0.000248293422325945	0.00887618195876768	0.00318391838516079	4.38780692045094e-05	0.0127416788744614	0.00401684724430735	0.0197405157126401	0.000598297899242928	0.00894855885795095	0.00475083905102156	0.0245055797383715	0.000220137891773734	0.0028246803061976	0.0324150397403961	0.0057152768399581	2.62296387566148e-06	0.00731679038449366	0.00926500236469638	0.00884545513106327	0.0201886055580454	0.00167378658967013	0.00457856053363405	0.00021795116547265	0.0104636750189679	1.43046469313945e-05	0.00112003401785758	0.000224071803580549	0.00129632490242348	0.00672326966088968	0.00704916850698847	0.00344123584369872	0.00209047365695508	0.000362120755325111	0.00196714727814975	0.00595656828172421	0.00201218075796148	0.0301919979225732	0.0408743739292862	0.0099790827611629	0.00275210758927031	0.004440404822148	0.00659155325432093
0.0177769085237869	0.0640384902888619	0.050065810073261	0.0046893754337137	0.00346038995484167	0.0314511234301268	0.00459946322464211	0.00949292458953329	0.0651393397870147	0.0114456661097974	0.000216653126273675	0.00671827387479808	0.010810529292605	0.00121876415703187	0.00825793679413824	0.0101900020968591	2.76925843499501e-05	0.0022252467021511	0.000668925028857444	0.0136069397549047	0.000530693169171661	0.00605454584860553	0.00827903631615124	0.0123134986110853	0.00812940638326495	0.0144200424575989	0.000348813229304151	0.00176290950474157	0.000118837120130215	0.00178667028908578	0.0195365832196497	0.00474999436320505	0.0211034139700659	0.0127755540175182	0.00179998706516837	0.000476308291474326	0.0102240047157611	0.0159240412919048	0.0225535504057427	0.00766317352922928	0.0255918258026532	0.0316331967372607	0.00326521419521408	0.000400903289496798	0.000123055604510465	0.0200253464545634	0.00109440548121551	0.000495248876397553	0.00328598870558523	0.0358315072626735
0.0536258315552144	0.0334271678273166	0.0558358372986791	0.00547122182322835	0.00294376162919022	0.0040400460316142	0.00385290106872558	0.000329404038021358	0.0154816807086378	0.000231899329009192	0.000383657258103894	0.000158544373106613	0.00458090390954035	0.0211261527374466	0.00017726148785807	0.0836001499643332	0.00170043562432132	0.000194216754171187	0.0105975612962223	0.000243130897641933	0.00354281124096003	0.00993223231018804	0.0216005445416589	0.00395423469930832	0.0032211700789435	0.00114839827965362	0.00871180852269449	0.0280369413391978	0.0330280553950818	0.024093490371794	0.00221423419940295	0.00343811289731871	0.00122315215920307	0.000439360375624828	3.82913874147046e-06	0.0196098527412119	0.0109309833007603	0.00159868186844933	0.00156723011894228	0.018885479335022	0.000275488003595597	0.00170817341706915	0.0519241264899057	0.0513550323078444	0.0056728879765276	0.00682832368127766	0.0168248526166493	0.00262135311718231	0.0156195893390517	0.00918059164545799
0.0157508353384723	0.0127985547651456	0.0348070511124767	0.015921870805462	0.00314513242607737	3.45473871635685e-07	0.000175451445348852	0.00024379425129966	0.0180772009593118	0.00634453570944242	9.38560614340776e-05	3.26926938663196e-05	0.00638174767541862	0.0325136479770988	0.00484491714988768	0.0226619531377685	0.00431011592048043	0.000466226490762279	0.00281732024937805	0.0197815641905717	2.62508590676572e-05	0.0321588915861183	0.0270923145467965	0.00457654764582995	0.00617934573483188	0.00184939575777007	0.0175522649647978	0.0240721118721976	0.016523596221336	0.0447356373728015	0.0183592932989345	0.0191422906668366	0.013238487488873	0.00822552679446557	4.44274434975072e-06	0.00625781756274311	0.00604258107171346	0.00868087129253642	0.0179024584572392	0.0281653581255768	0.00800856386845263	0.0073558489287637	0.0711514597338703	0.0278346470357054	0.00958041880606706	0.0325204973886899	0.0310288314210229	0.000622455338642438	0.0757838712272031	0.0159220884791371
0.00121623255459916	0.00290158200087211	0.00421376929239044	0.00339229808999215	0.0394281807036276	0.0105755270193985	0.00266223783645206	0.000448589493141302	0.0220917164508369	0.037834849288133	0.0285614733748484	8.0611006666736e-05	0.0109492030244559	0.0175700223673352	0.0262778963768767	0.0370358175574388	0.0882167891722528	0.0361338988843847	0.00523486917281902	0.00462257915156516	0.00627274569670627	0.0180646019676457	0.00899503465419464	0.0369317597461955	0.017267876196162	0.0452346860703988	0.00728306756829437	0.00921415819974573	0.0118228110588364	0.0065094687685157	3.56086429043476e-07	0.0314235037889642	0.0092203141159566	5.974066293761e-07	0.00250871311667307	0.0165551106659149	0.0276413875707018	0.0153771973768779	7.8646732247355e-07	0.0294343332867299	0.0285750220520071	0.0537118180777335	0.0519967006348833	0.00972950695208884	0.03330585523479	0.144392196891215	0.0652427351972976	0.0142039844106155	0.03648649416004	0.0045839272438245
0.000228419248958891	6.03055767921611e-07	0.00107999078556943	0.00546783476972812	0.051954917698977	0.0233826310988487	0.00350303908250569	3.26868484353642e-06	0.0225717872311632	0.0475396798588823	0.0155046681458841	0.00101808867318949	0.000186116984722631	0.0113172387066532	0.00997546585611764	0.0261509852038376	0.0399215179018217	0.025222128549378	0.0127573687807364	0.026071268854028	0.00620369747203619	0.00511864429725829	0.0080300617597154	0.0334496159614713	0.0136168097712232	0.0638656546622967	0.0106636491225883	0.00909765680385076	0.0140728248761241	0.0698431411287675	0.00550341816262613	0.0706513422770653	8.95557666222239e-07	0.00793103672053302	0.00324003948209418	0.00109562204922257	0.0018069907429503	0.00880931540256273	0.000699662216003162	0.0764188784490621	0.0105801722443834	0.0608765116901447	0.107080929392277	0.0295887492818519	0.0469220667119271	0.176423305683142	0.140627437360328	0.0354325636523189	0.0766047667739161	0.00143034530924702
0.000335429157003202	1.09434274426134e-05	0.00350211785913646	0.00598432184478128	0.0219933738953539	0.0155923109428287	0.000274291512429073	0.00208229858431458	0.0151435845103547	0.0379773031038449	0.0229341349944233	0.00740125581418773	0.00701063287278658	0.00101332584734538	0.0124938653441121	0.014589148832961	0.0409729357946509	0.0287806171538556	0.0108749992335011	0.0722193772964813	0.000163886925782405	0.000174058347424371	0.00940662281503325	0.0236335340598202	0.0101266316976262	0.00360085464562391	0.0229365817282119	0.00154856911233055	0.0140298979855914	0.016533997599238	0.0399808072180208	0.000451610290794666	0.047310787015265	0.0154840442421973	0.0101562965411685	0.0255613703482684	0.024045567741941	0.0578338839565285	0.00112993809340727	0.0360389773824282	0.0256309865601798	0.0099947133336458	0.0497840313779688	0.00880227445097467	0.00701504774119883	0.0565666859131271	0.0011217825303239	0.00720990935155928	0.0150731295511342	0.0024537359246249
0.00972898125039063	0.0448049741635871	0.0282732252986093	0.00912731789761409	0.0114155727734437	0.00579367452124753	0.00322328236526239	0.00359006588991762	0.00761602330434653	0.0291375019884947	0.00295441156332479	0.00100283132229798	0.000398359829127068	0.000838503236475093	0.00119325100923939	0.00164489521667899	0.00512868870151916	0.000412596536746537	0.00029454387562181	0.0432220806194486	0.0122531198737799	0.00929497737547858	0.00243450756082246	0.000421033091729771	0.0604466732913997	0.0857956006161577	0.0104439900956501	0.00422452495338278	0.0120654150578594	0.0515686149470079	0.0616422921193456	0.0207398125322719	0.0380125822924509	0.0558039416390539	0.0368468014948554	0.0431702297134743	0.039972299097215	0.0592987845961622	0.0439904481328033	8.78438671938954e-05	0.0517493151736012	0.000207640709734124	0.0334012352566212	0.00155118100293237	0.00018546141277901	0.00997146572606795	0.0293583074198988	0.0202622750642906	0.0221384513220498	0.00023809250439608
0.0028375831567377	0.000526889898570531	0.00245231048302565	0.00130994756593362	0.000630962707874274	0.0219863639544356	0.00620099453561189	0.00021039872842605	0.00352437491839034	0.00202327606479277	0.0123230354514779	7.48889864000513e-05	4.71004566190318e-05	0.026201993659622	0.0213350248537082	0.0148523043285742	0.0148120864938551	0.0212819550149729	0.0445722994085082	0.00174267899210495	0.0290016397745614	0.0296613444500025	0.00144995933597724	0.00821604798418529	0.00751133886677965	0.0119491781142967	0.0199740751590586	0.0513477038343661	0.0346566639197408	0.000607191175826705	0.00750095375001777	0.0042958641709962	0.00485955651189925	0.00376770350631341	0.000148502923576906	0.00782069084328817	0.000234454660348232	0.000116804965303017	0.00865306332451118	0.0514732065121337	0.00747685993501068	0.00973469498365476	0.0490372793564496	0.0429975583312386	0.0169604228547133	0.0230551628130066	0.00642208565246315	9.0787337109786e-06	0.024942632382703	0.00165969501064432
0.000245617882684955	0.000135052842130207	0.00286835153011544	0.016676669508193	0.040695532764106	0.0707597667044859	0.00507007902918557	0.0117221772955355	0.00107656421098913	0.00158301713695545	0.00271554184157321	0.039064675113066	0.00457296580827461	0.0473710511471866	0.077549366542079	0.00307294960493571	0.0636540516232446	0.0239249528003448	0.0412613851939537	0.0486107141962541	0.00887073362465189	0.00088811982889667	0.00525828355722063	0.00107206481678572	0.00171654546953485	0.00102989391447836	0.03561393476709	0.000632649852209969	0.00119054731775589	0.0126451593598855	0.00187727685530447	0.000345828307499611	0.00658266294047894	0.010639741371731	0.0109984521056971	0.0246880930847517	0.0632670051404029	0.0388903794434103	0.0354810682636352	0.0437234007299803	0.0148964498565735	0.00426681975969721	0.00528499102212743	0.00890174844209522	0.00403478137854191	0.00338899745787231	0.000172183206921371	0.00381470697061559	0.0182299322129585	0.0109855067475922
0.00510951902608812	0.00731404750118453	5.66032096698076e-06	0.000308285572047933	0.0208623567476092	0.0566939624953868	0.00262821936666947	9.1946520677635e-05	0.00822164031132303	0.0132233974367057	0.00289080158825225	2.78847387091537e-05	2.84203139208123e-08	0.0310454262188633	0.0339210098214184	0.000221895728127627	0.0388599754442507	0.0332747408595862	0.0258432276996013	0.00542975510448729	0.0284529846037828	0.0303480921816128	2.48526324797777e-05	0.0279263747378075	0.00355295164471888	0.0110259274067863	4.05550600601514e-05	0.00176107647106104	9.50112880645268e-07	0.000163323876050861	0.000242721972564279	0.00334543237582885	0.0124232651898266	0.00400192283371894	0.00497181612871734	0.0153735649737841	0.0142454811817499	0.00823945588520667	0.00217665821844448	0.0266106612991114	0.0348495996500241	0.000549495953430873	0.0205284033841435	0.0269684148897254	0.0188520214335998	0.0364275087057369	0.0131827655882277	0.000676832372826465	0.0232649473868583	0.00196011877019338
0.00876673698038932	0.0108659980706609	0.0657327641114007	0.0465759446595878	0.0567835018130413	0.112041622298265	0.0409063882569392	0.0376764329446128	0.00852151211517997	0.0134576622914761	0.000203529286556787	0.0342262732115918	0.0161613639207024	0.00742011594482754	0.0440313302782929	0.00247491588898375	0.0118705011802588	0.00303660908292233	0.00784617704127959	0.0306649317368975	0.00104167492812067	0.00424197750274256	0.00607204951548722	0.00122164070386447	0.00350141240714188	0.000450329041528488	0.00163192140077324	0.00118245770319427	0.00260000812083591	0.00266896082604072	0.000105362101951138	0.00367127129103431	0.000841702473681118	0.00305551693539053	0.0159548966610066	0.0163065852302392	0.0463968539294035	0.0552861752068254	0.000121237716969428	0.0259951725688996	0.0207287466778889	0.00159581110408129	0.0711799748491458	0.0133467219094831	0.0404543143038802	0.0425030150353177	0.00677079336614098	0.00183900668505046	0.0610540455846463	0.0372629165977208
0.000174671473846639	0.00108706190244948	0.00617192785702422	0.0311947920714252	0.0394635428261894	0.0551083779778296	0.0453649158302452	0.0203953741742524	0.00284513707085243	0.00221884934840774	0.00206583086537888	0.029808690285883	0.000222723849166362	0.00668001663076859	0.0472290083090425	0.00052499500837843	0.0451742770932338	0.0279040746412392	0.0074550389149586	0.0325387883794908	0.00348513006091596	0.00374498573964724	0.00127787842325937	0.00380752353636241	0.000234483305907398	0.00723123396727941	0.000619947755520082	0.00410521118529759	0.00135745491266032	1.51944654260952e-05	0.00271540088517561	0.0127146861653001	0.00287949301832529	0.00376791805953714	0.00563087635435061	0.0322459376101341	0.0854158728709918	0.048922525999754	0.020699970049532	0.0392250765919661	0.0163937896070498	0.0141332904607505	0.0408923686138491	0.00717184237208903	0.0252568049170215	0.0680607964783772	0.0375652856748175	0.00272429060174702	0.0927858341798749	0.0201403538450618
0.00366800812300709	0.00107474365373381	0.000866075350248706	0.0186024075919795	0.032942369807291	0.0650325409850572	0.00973408948147847	0.0127380078860454	0.000547772271289558	0.000196787844635216	4.25217449532705e-06	0.0289920855885434	4.40500910435876e-05	0.0339914441177033	0.05320296515163	0.000128586313049022	0.0694486480899946	0.0208201665473962	0.0302629145129405	0.0291607520236403	0.0104512388324433	0.0106006464415976	0.000353943052852931	0.00162693935860819	0.00386415428287685	0.0147237191212817	0.0252911038681865	0.00316021753951656	0.00278349492981258	4.16337101545752e-05	0.00138045378624017	0.00639521613567422	0.0140774329443346	0.0162077933521386	0.0135601650094525	0.0539782271327617	0.108338234661554	0.0448171202161486	0.0155701367463077	0.0207425781512851	0.0396407578063044	0.00189725633041964	0.0112531913663366	0.00492758297096024	0.0319320066413448	0.0414441357394924	0.00893367840926737	0.00129157618062992	0.0324742872500808	0.0069409286034231
0.00175899002564538	0.0180809625022386	0.00118500637907653	0.0020162127474308	0.00643166919713856	0.0134081137262938	0.000612069302531589	0.000144281943269715	0.00749492487122242	0.00573731381762595	6.02896403446793e-06	0.0138161405775089	0.00580179503827523	0.0115087609891285	0.0279612874375602	0.000228486256483291	0.0194273458819137	0.000430929316439731	0.0409076144919132	0.0460188549518584	0.00133903063583731	0.00106295387840891	4.99207645777397e-05	0.000113568948248033	0.00187854565242559	0.00546419086084715	0.0178274422212781	0.00289859101356335	0.000987302488207016	0.0260706350813924	0.0301929567590311	0.00940131945815973	0.0109524381560055	0.014236143354219	0.0018007215061139	0.00524985421148401	0.0336073127344037	0.0206864221485759	6.0526830514814e-06	0.0362087360466092	0.000383015279352721	0.00407333951389119	0.00469443185470807	4.77866490979691e-05	3.10405787134425e-05	0.0015758344436056	0.000571894500754696	0.000403093660124915	0.00572926048034814	0.00465760710521853
0.00514590621452249	0.00225560797756058	0.00813185255303767	0.00962025825766944	0.0331276541196336	0.0430459976987114	0.0194219138459733	0.0149881751731044	7.06127591385721e-06	0.00573874420900713	0.000246357793816742	0.0196056392477359	7.97802571815829e-06	0.00537875591020164	0.0174123464036105	0.00183393782551698	0.0368249509956587	0.00960860126183681	0.00746792345054365	0.0461061797680353	0.00046411221449112	2.88467429540892e-06	0.00180619344634109	0.00366678548062862	0.00146428003479501	0.000310887116267985	0.00482717556874491	0.0199751785294461	5.32103656662798e-05	0.00810097941106648	0.000205007523368097	0.0198715111856512	0.00422310805104746	0.00129055098180328	0.014567826335029	0.0245038246746442	0.0399670100141673	0.0466140524388283	0.0228567056699536	0.0653897560212347	0.0384495899338006	0.00233414350871365	0.0484274622189602	3.88777839595516e-05	0.00926255842435811	0.038924705415625	0.0328469244687909	0.0147027069349692	0.0625048083463781	0.00233606593178354
0.000502205336436873	0.000138743569101488	0.0093113879344514	0.000588327457346919	0.0132471650329756	0.0138779193574329	0.00123172395025955	7.10231714519092e-05	0.000925713948342348	4.04232229977008e-07	0.000233576828888092	0.00934715167960745	0.000780712694870084	0.00115788804048091	0.00718042770973827	0.00411777829464949	8.25200808412662e-05	0.00349020119078055	2.37481476213995e-06	0.0145733069860301	0.00100969154508727	0.000163514047655174	0.0197427053194212	0.0248763219565636	0.00839394633988183	0.00171433207625723	0.00105723400824367	0.0154001572235936	0.00785040946986249	0.00057676343412525	0.000799094758536902	0.000870171371856305	0.0138923423985414	0.00628515753811918	0.000492305238228706	8.84933572993726e-05	0.0265393251107079	0.0270357903982347	0.0136947826939587	4.35036383488894e-05	0.00699565745823024	0.00374871543110681	0.0027406481001849	0.000819062656665663	0.028327577145579	0.0272876597548964	0.00047704173499648	0.00471491395369917	0.000243727301172723	0.00273439658430501
0.00373630193971526	0.0541828226396937	0.0445340248413082	0.0167059234553667	0.0243716451034375	0.000564457772091092	0.00228976055916995	0.000424354533276331	0.032558995510154	0.0219852609158462	0.00465785650978858	0.00868920148615571	0.0124569655709056	0.000643307852755087	0.00369309647171878	0.00446951355688252	3.82807636120481e-05	0.00274289136308471	0.000671259415161748	0.0152153447032854	3.10075558249083e-06	0.000519438230678505	0.00222362252995449	0.00924452631201211	0.000203762381322247	0.000828911226857413	0.0272502994389519	0.00114623141191613	0.0168925033028748	0.0961648553967214	0.0583335814422727	0.0718758901426652	0.112353346610217	0.137418778045022	0.037568321941176	0.00816191067907593	0.000151911062786841	0.00694582034006978	0.0695394176056411	0.0104953124756154	0.0998519387739938	0.00771673975523251	0.00940303396067726	0.00524059665366789	6.13594752467274e-06	0.00371609753234971	0.0609579622910915	0.00355062141104555	0.0213095778770394	0.0147183460701316
0.0291194067480965	0.0564355068075174	0.0432459391089408	0.00614840520953333	0.00177021051895447	0.0254162796431178	0.00121874810427567	6.7550820845982e-05	0.00550795652024218	0.00200698900272679	1.48933645621804e-07	1.98834177428693e-06	0.00102646150359334	0.0115310166574088	0.0139067188947393	0.00850870426303602	0.0404938376279831	0.00990190261484445	0.0113184235028055	0.00453814712812188	3.46610454921791e-05	0.0011157553691959	0.0126236942997507	2.26603420363738e-05	0.0204820446193859	0.0220372616299595	0.00767953472219491	1.88615248413053e-05	9.95484407381333e-05	0.00488637569325215	0.00896809840777437	0.00372262571402192	0.000738424152424577	0.00046953753506334	0.00883161161608322	0.00720992041249878	0.00666278069024313	0.00811253042956898	0.000410106022956853	0.0263634798107874	0.00263887691237952	0.00303134373338108	0.0462839256692561	5.40522464702762e-05	0.0201791560417466	1.40177281804939e-05	0.0131804341450195	0.00507727838530206	0.0463672811662715	0.030231948748315
0.00164069582127477	0.0170821218351394	0.0191315821392709	0.00155163123950471	0.0306603288052535	0.0130331514543518	8.73025115089418e-05	0.000609395486573088	0.0331032708210963	0.0192489442123963	0.00359308250790488	0.00724043635972067	0.0145271998768269	0.000423261961072682	0.00292328863741647	0.0015638779098897	0.00148022453534969	0.00129811901068939	0.00890711062186985	0.00483251240376474	0.0066076965612596	0.000654953128222472	0.00793005808684531	0.0028404278882988	0.010385583443414	0.000393173105693037	0.00658858966516806	0.0156091615197858	6.44752303935668e-05	0.0119879014830518	0.0381265812001495	0.00511727724512139	0.0205082299932584	0.0654090249433063	0.0467201943616714	0.00176892404879749	1.88381299086608e-07	3.84629641106643e-05	0.0299154467625592	0.0125849334211797	0.0277438300858054	0.00281731366349606	0.0214519205384508	0.00349916189848644	0.0147459538591131	0.0105533201415735	0.00169928659454373	0.000416869323389337	0.00163098786983276	0.0015311978500869
6.469882230634e-05	2.20451456640253e-06	0.0026586521525446	0.0141797765874311	0.0947463451762702	0.0500917901948869	0.0243296963967173	0.0168275041898897	0.00101966734108585	0.00581133126350886	0.0149256413618371	0.00138585947527845	0.00730268703308657	0.00329894464217473	0.00211005250472713	0.00068402072917261	0.00093734793130354	0.000355952984555547	0.00565418389442027	0.0105019402349862	0.00554149489371782	0.025505349407268	0.000491100319534881	0.00414711777488403	0.00608772238182923	0.0143152097285468	0.0359920861495164	0.00892575812424115	0.0112068457044704	0.0307604213226642	0.0382157583274272	0.0305153043887172	0.0600266982176496	0.102018653887094	0.0334418863479344	0.0024327068041118	0.0133213718367012	0.0167257478192172	0.0533944657839328	0.0169670402543591	0.0295660574409238	0.00598380899340036	0.0158019043637246	0.0136159638030341	0.0147450934217092	1.05377845960936e-06	0.0239060053810872	0.00603430398340773	0.000231081502600099	0.00407656466592752
0.000960687647322421	0.0108003333823431	0.00438071016171383	0.00569745063724089	0.0121650196307907	0.00169755128872125	0.000276999322092579	0.00648240470927741	0.00561759271497023	0.000449930444324438	0.00264133643393501	0.00528883858207181	0.00228915836918438	0.000903374187867726	0.00161342751298038	0.00191061845782314	0.0196328798350362	0.00499089946093458	0.00105279595907306	0.0342446966211187	0.00414905315743606	0.0052563820791172	0.00188842506368638	0.000327792438426845	0.017264328311536	5.06183879638754e-06	0.0135293661071695	0.000113032872505092	0.0400934797821947	0.0403104715538799	0.0799099516348557	0.0110136200258669	0.0510371824940262	0.0688053788465243	0.0627601078272662	0.0507455811780237	0.0538284269519358	0.0421407339172111	0.0338613198389439	0.0106247560313942	0.0203568556834252	9.59561743712225e-05	0.00152369019158872	0.00266177637648646	0.0122494903364272	0.0160963911529711	0.000438407186773912	0.00668244587917304	0.0151391058820359	0.0114205055031368
0.00027572894056764	0.00882888083318984	0.0207727832860558	0.000272595616721853	0.00613765910583565	0.00183441210245261	0.00154519000166915	0.000103066067487644	0.010349308020372	0.000688060285434393	0.0068579865992807	0.00377828080328786	0.00233321968593665	0.00722422158357951	0.0041228833787	0.0367464916793179	0.009707587554505	0.0219506404616424	0.00112082466411522	0.0330201627670125	0.0422471410643702	0.0384486837402774	0.000249943170354431	0.000138978713518979	0.00412369936466066	0.0033402803330657	0.0245434799622113	0.00733697385000517	0.0565208326025591	0.0375456190650409	0.0432194914107984	0.0617308960312383	0.0454164966137197	0.0559851858657855	0.0704602753020512	0.0403550358974185	0.0339234379697862	0.02843827125689	0.0352337789117915	0.0213206457805663	0.000764379047156943	0.0691527595818915	0.034089582862695	0.00628915376537069	0.00142875717068196	0.0183969636880816	0.0430515379063141	0.00263977154067156	0.0193746255087986	0.000800589073271284
0.00380934397027934	0.00409328233924203	0.00502320229735242	0.00271094803751155	0.00385178035328844	0.0261315092710389	5.85135821326235e-05	0.00291870169870379	0.0157722363254061	0.0340636283143165	0.0242005220648231	0.010464136719445	0.0365092912054314	0.0303882276241929	0.0767554755370041	0.000201581969581173	0.0850649171229877	0.0552649142973808	0.0480449406581078	0.0222244509766399	0.0160412001903636	0.00234407574325721	0.00732699811315217	0.0140047331800954	0.0144846958482052	0.0137739190235023	0.0195061218017449	0.00347391265260304	0.0114464187234844	0.041383469980895	0.021874249086977	0.0134993753315534	0.0210301878175813	0.00166589159262519	0.0081627115736628	0.00899500679082408	0.00531375161185896	0.0103731217185534	0.00242353880506023	0.0331614227761751	0.00346900239763499	0.00166635629157958	0.00867520486130971	0.0012278760940425	0.00399854352140779	0.011010752027925	0.00239324586153331	0.000760736337073332	0.00834439121033752	0.00110771035321393
0.00372428852035164	0.0274487193639729	0.000775885714058056	0.000127977029108061	0.00120049432199152	0.00292798426218437	0.00711096528416549	1.47179074355496e-05	0.00379078842039851	0.00958418071251435	0.00132524014274594	0.00720072437770307	0.000263993261630422	0.00533707924877001	0.00017702002855843	0.0569426803581979	0.00609877519921266	0.00469988634940669	0.0207881761816506	0.00333478201263409	0.00309982608571075	0.000115528394263265	0.00189598210222099	0.00185485939682013	0.00808458856589539	0.00271090885956433	0.00148488587005267	0.00163418532015537	0.023977499666235	0.0338347750705776	0.0164311171155924	0.0083775380782101	0.016863247828516	0.0118724521330986	0.00528264478427353	0.00373966532134369	1.54600477050706e-06	0.000381373613229938	0.0120193106642549	0.000214473552059933	0.00533700467630692	0.00209446989561352	0.00940534865980999	0.0205550184666884	0.000543253978665639	0.00287180546515976	0.00226535727391006	0.0157302932349575	0.000333195061742569	0.00858596182755395
0.00488623164588351	0.0679114824142361	0.0158249603654725	0.0449693766054666	0.00310710912472114	0.0142929626656155	0.0547950512099622	0.0549316781984649	0.0336564572822882	0.024785812213195	4.88671222409901e-05	0.00134505351043481	0.000241683979728433	0.00733783497065077	0.0151427037172409	0.00217046762204676	0.00791679340405371	3.70206793428402e-05	0.0399223344921596	0.0009506640788867	0.0135993421054263	0.0014998083868711	0.00601867734109517	0.00032792874089444	0.000788384273568521	0.00845509868255932	0.0279517795572207	0.0023567096159823	0.00325918530695775	1.17552875368635e-07	1.90978518310625e-05	0.00385156542820119	0.0194052147045852	0.0106415453182864	0.00168536191615189	0.00160496580820512	0.00479591897278395	0.000466286886716491	0.0135760367244208	0.0286004589950721	0.000880100094506608	0.00614593711177451	0.045330018536447	0.005165367832582	0.000577294990998174	0.000925894123487179	0.00570835663593463	0.00286661798583988	0.0121977594292519	0.0102009940238209
5.88303208908511e-05	0.00510223763794384	0.010413983759222	0.00630432696966656	0.00163277746357378	0.00335183110984033	0.000371499951622978	0.00559724653527729	0.00989027780217783	0.00163686469911098	0.00982333770834771	1.48986437870067e-05	0.000100530949406539	9.70582164274722e-05	0.00204094445149803	0.0123716949384825	0.0118679130351675	0.00259216015318967	0.00428923504795535	0.00234660521969084	0.00311509229026548	0.000416780351663712	0.00273281759618202	0.000201879570082758	0.000853291395112487	8.45398785380831e-05	0.000248706565954132	8.83567231551416e-05	0.00832776711998011	0.0237200468152039	0.0223794702328723	0.00810749538096036	0.000425958949951736	0.00931436311402827	0.0395607129393852	0.0161175383939965	0.0237746492259203	0.00843242147888496	9.74660980686589e-06	0.000255670993739868	0.000909916030174539	0.00598643927634561	0.000936532092587036	0.0185247919753977	0.0179177817349955	0.00207744782606104	0.00676793991743208	0.00302898275439507	0.00444790446692932	0.000769452016845316
0.000188765367296113	0.0167499723981196	0.0215538251046412	0.000195503041522782	0.0248740269830629	0.0123206516265309	0.00220979187318549	0.000383111880402097	0.0276122345075534	0.00625127404001848	3.85211965800054e-05	0.00133707014170696	0.000294573208617219	0.00501629853241538	0.00942992609908801	0.00481589670207634	0.020783074366507	0.00436378738534161	0.0144577838965775	0.0236880895574416	3.61622690072381e-05	0.000151342620157809	0.0129907480397413	0.000449068675035754	0.0107697760768318	0.000203110053349844	0.00955807769611672	0.00132588918571215	0.00373386287384682	0.034667024622049	0.0170671970193021	0.0295306019104434	0.00896369907106908	0.0270059365226968	0.058196606381713	0.0111051574015484	0.0154637717690775	0.0192368161272688	0.017776045569068	0.00913376975668484	0.0442989064040395	0.0136906652971927	0.0263110649782488	0.00509951033215915	0.016078210306027	0.0233430938780313	0.0310313176620885	0.000489567793361496	0.000702638692732905	0.0130989103813375
0.0379143688460481	0.0483007906755399	0.00294929922217955	0.0017892939467248	0.00257710518271251	0.0220215944418056	0.00271442919515504	0.00476433399184746	0.000277234098205547	0.00274894494855101	0.0108325731774966	0.0355791293012383	0.00173293951471501	0.0198187927491152	0.0390537045158646	1.10136022003565e-05	0.0173680388269232	0.0047442541515969	0.0725968287313915	0.0371589400737836	0.00455619733407212	0.0114889972171325	0.0112092061511287	0.00614400601161307	0.0184310699076764	0.0251586553920162	0.0274189602412329	0.0102399787291622	3.70647098472924e-05	3.44912888072591e-07	0.00345382871000647	2.75679715059565e-05	0.000419170481886558	0.0133334619934043	0.00105263290152777	0.0056949910416581	0.0299765008027777	0.0442636885109169	0.0206166379810046	0.00110258931253686	0.0251234028221807	0.0197841670832061	0.0166502743002261	0.0028432518533492	0.000118438327887938	0.0255028695769935	0.000325201613848143	0.00281526412814189	0.0024952286288165	0.00515494724166793
0.0139103560535817	0.0438762713991177	0.016995152763408	0.0002724158739241	0.00291008215669631	0.00966064052798157	0.000150839016825713	0.00526682507258405	5.41709085397868e-05	0.00368825273005133	0.0010055634255255	0.0649248768753718	0.000492146184497993	0.0448951488947994	0.0739293957962675	0.00116456444393857	0.0525224336515254	0.0224378736627802	0.0547197023833265	0.0559004874324536	0.00181772700500572	0.00353258749652428	1.30198314925806e-07	0.00977155869246975	0.0197079598032605	0.0418051734536596	0.0345402220067079	0.0147290096121839	0.00142711752288844	0.00132835990035763	0.000173452299383234	0.00441013355970524	0.0136982379054485	0.0348974410809672	7.58466748953839e-05	0.0501638296798242	0.0509128507060274	0.0339874629121229	0.0500020249469987	0.0504574698815871	0.00015553916607956	0.00123400312739699	0.000654905979666264	0.000109372830089397	0.00155051611683462	0.0448896981002374	0.0068542821633332	0.000582024545587503	0.0142750675649469	0.00018381790189033
0.0167649671052819	0.0151310992855391	0.000279327054007288	0.0150987689964587	0.00060745936975719	0.00735040147469003	0.0290579452452401	0.0108077130090302	0.0073917473535542	0.0388349448455291	0.0214210677737889	0.0204792432048838	0.0261041250347339	0.00096070281161157	0.0129880827923551	0.00093163815562969	0.0144878875756271	2.47511556408043e-05	0.0143408252895957	0.0233947630462132	0.0116961825651913	0.000512553706419733	0.00339658483446507	2.83723004695466e-05	0.0021414557712047	2.18946887706251e-05	0.00184900826060458	0.0026856653922373	0.00429020080244967	0.00425368623800046	0.00166459886341441	0.00514498654325265	0.000363796542257179	0.00208180649529576	0.000736019375120045	0.00838487793279505	0.00893558821247402	0.0294567893710398	0.00975530601186006	0.00138363773862412	0.0124402001506883	0.0121047413661022	8.19192437527018e-07	2.48245379244845e-09	0.00431138084849183	0.00962098252030062	9.13997951238455e-07	0.0018773263683271	0.0257803150418242	0.00565091038770998
0.00871732577362442	0.0105913618102007	0.00228811689641614	0.00744154409983747	0.00478370062361175	0.0121226230232656	0.00638296875182046	0.00845877992825644	0.00188394921408425	0.00191930306541506	0.0014458453044956	0.0293137769179694	5.0354133371107e-06	0.0188241361843961	0.0649621550909521	0.00436075759168486	0.0625635719136426	0.0189473111123659	0.0341906891586834	0.0933728455959581	1.39064651951264e-05	0.00165542636484966	0.00167664351205773	3.29084518863237e-07	0.00185203486579961	0.00203900582925614	0.0125704871409393	0.0100715620733963	7.92091635504558e-05	0.000891125294324642	0.000307996304006581	0.00176298591270264	0.0042142555017444	0.00647629357318331	0.00816171668967972	0.0150220246321783	0.0425568886725781	0.0685127678603041	0.0351325756303254	0.0383024951997663	0.00704119690482908	0.00305353411956187	5.77703209639333e-05	0.000685097987581811	6.11897961057416e-05	0.00333514297047312	0.00167258515357944	0.0195536246672759	0.00191024132624001	0.00110066679816968
0.0595765450723672	0.122362898023927	0.0571369929415832	0.0815936166811225	0.0187190397250877	0.0904487761647294	0.0521634580852212	0.0712653000543639	0.0604747953703898	0.0568770907472261	0.00295192294416319	0.0238265317958626	0.0170979285410026	0.000235299184443169	5.48312154244177e-06	7.02065220728451e-08	0.02049685444942	0.000286646227224234	0.00136092080281441	0.0076107411093042	0.00732549864388212	2.42826116043613e-05	0.0128168618985902	0.0118002110512214	0.00395332949013483	0.000122127325569777	0.000550428787630694	0.00789663314438589	0.000548648504369745	0.001287293875875	2.55695434168563e-05	0.0209293725143122	0.00376054427772608	0.0080275954111594	0.001858960034374	0.000460250050982305	0.0189511240050298	8.93420728605674e-07	0.0175296716330225	0.00249402118893368	0.00163022164941149	3.49961490720952e-06	0.0143830980003852	0.00491599535559174	0.0542220799285784	0.0505913725138401	0.0293485679317603	0.00142804758800975	0.0692423383131608	0.0158167571304342
0.00199565044530213	0.00393152884292396	0.000509718593707023	7.38530890794795e-06	0.00719639658339081	0.000415321441606333	0.00129717859744509	0.00590424107392909	0.00802460456844606	8.08081862943997e-06	0.000475280513174858	0.0103735578880157	0.00402091442604223	0.0275834817750903	0.0436449443572485	3.04538448269906e-05	0.00718960304351832	0.00554630606063537	0.0533194351862092	0.0345164909744549	0.00531315205659302	0.00354886204089671	0.00256053587622663	0.00404801677822071	1.8120903648091e-05	0.0214641000782071	0.00218201685926217	0.000387429971894813	0.00711752220582443	0.000570807289594562	0.000493107528130353	0.00962418329835834	0.000341600215939313	0.00292187003391809	6.74470601969087e-05	0.000882777549972402	0.00140635220032343	0.0163149318293187	0.00677197538269855	0.0125207218297681	0.0130167699760851	0.0252727634798178	0.00899032055225346	0.0141321719812722	0.00422306046915929	0.000278877416668496	0.00192430639671916	0.0209004068543651	0.000788437129876099	0.00257995095895689
0.0602111658627342	0.151933676657217	0.0774614712033104	0.070268381447017	0.000815077239719942	0.0338982651290497	0.0664675188457521	0.0834613955225456	0.060585086631442	0.0380094521564679	0.0165454028042163	0.00193749520908766	0.0398764652295041	0.00898774749717157	0.0371592660778388	0.00678095216538588	0.0119962368857544	0.0182979303896286	0.070830802818705	0.000204508264782185	0.0320097414207691	0.00175097729240728	0.00228857670437683	0.00336407364664704	0.00768749129602491	0.000222041061048377	0.00124354511729345	0.00555639825508567	0.00303884885168346	0.0138288101407076	0.00330696084714667	0.0406152675644937	0.0052972794354404	0.00473727860308677	0.00102516830837936	0.000249739534011209	0.00476661180817952	0.00790820802713545	5.71071924890948e-05	0.000138915349965499	0.00100695544459637	0.0572506824784813	0.000300948167316352	0.00419652828297442	0.0297272788939059	0.0601129923505268	0.0300785519899107	0.000278691568749199	0.01742858652413	0.00817754601746946
0.0723694410023873	0.08238108106067	0.100392049397045	0.00573153641555293	0.000770563602182007	0.00691326481274352	0.0153931373246922	0.0455237241172899	0.0369597604454078	5.95923457021184e-05	0.000739751909478824	0.0112085317515778	0.00428222487837921	0.0188279018982994	0.000931896193475415	0.0684092638255471	0.000813686900159486	6.16272854105902e-05	0.00552794408393629	8.5841510420083e-05	0.0107852041072929	6.29257337084473e-05	0.0124189913282262	0.00313738475514136	0.0161163484457459	0.0145792109217774	0.00190095286243781	0.00830991579914448	0.0285269741286504	0.00215298250221912	3.16788513879601e-05	0.0188760149648644	3.01326560262728e-05	0.00465626089355426	0.00379309346496136	0.000103230321307108	0.0029572139902868	0.00906162433427128	0.00113149151335199	4.0591736624077e-08	0.0220218297585868	0.00291699312798819	0.00148833688078665	0.0297114087333735	0.0298706332948987	0.00728909115848692	0.00783921070313436	0.00427332966500403	0.00447583253221381	0.0335116471624383
0.0797954575281401	0.0859104627955571	0.059750382922231	0.0283649543648814	0.00928429625851267	0.0105470374202255	0.0368492324951054	0.0319745404959742	0.0954248968237992	0.0167594164899934	0.00199390233146995	0.014241831660039	0.0319416199061338	0.00485869239398386	0.0120983292108772	0.0205786443558756	0.0269213692797812	0.00335638192099158	0.000667930309501999	0.00296645273392234	0.00279825110231878	0.0098075289407098	0.0177360114882775	0.0053198528082555	0.000451311391018632	0.000857269053528414	0.00267999609975451	0.00440669151581721	0.00326258776518439	0.001104038036414	0.00376734840294139	0.0267581475300873	0.000815583358728079	0.0088588408964319	0.0137317609368514	0.000821672938175471	0.00310107516213469	0.00255320789083538	0.0058000698481976	0.00248464233301135	5.53548441439659e-05	0.0231517061583756	0.000318452718548443	0.00590467004495775	0.000399125770118433	0.0186007017606945	0.00285889206600684	0.0142931224066171	0.000257055133588278	0.02079044003542
0.0174138274031977	0.031727415849231	0.0156943916237933	0.00270613782317862	0.000292775631306512	0.00777885625232822	0.0208483806941678	0.0705575820211105	0.0201707907464198	0.0558141375954608	0.00603408397150352	0.00580084030979503	0.025756962323964	0.0217186025404473	0.0252555554978773	0.00566893198866003	0.000196350657145533	0.0019422619641775	0.0205377419236134	8.31884629172373e-05	0.0204793156464366	0.00203410663767967	0.00970367289596595	0.0029969964895055	0.00265153771340385	0.00911837559723938	0.0190595837747205	4.72668825263249e-05	0.000151950350089641	0.01743076924645	0.00701277156618283	0.00548860878933877	0.00464693041565581	0.00370929353143007	0.000638739970175534	0.00852695289933607	0.0329388008276543	0.00673978392635312	0.000702905037239071	0.0156524144407107	7.3132014955009e-07	0.0040076920789183	0.000985984553673211	0.00147608228195719	0.0430473730672858	0.00916150606377204	0.00565016459362723	0.0122653825013939	0.00846259185222703	0.000151209918124301
0.019966578342729	0.0635910894463524	0.0126541905038618	0.00369044993488224	0.00215401940777644	0.000178733434802158	0.000130059444547652	0.0198017969479224	0.0230716025993024	0.0260089896332789	6.66808724918668e-06	2.34272530652018e-05	0.0112427726254364	0.019142018690018	0.00926299119544374	0.00521045940817016	0.000528610989038668	1.5828551258468e-05	0.02333299726319	0.00512936499735827	0.00572106811542713	0.0104308939292884	0.00296271500628576	0.000293892660293934	0.000165039750487489	0.000238597771606776	0.0195348375514763	0.00124297297470727	0.000902563682057914	0.01199794164305	0.00715513824878271	0.00433978125218906	0.0040142421734174	0.00651335172266768	0.00215747592684824	0.0012128594362032	0.00910845100184287	0.000619072847400286	0.00120944658782628	0.0114653581307129	0.00214622636095411	0.034474632088227	0.000596503471396093	0.00714763196644256	0.0536450584668048	0.0124212467498871	0.0141464076168564	0.00485812908127641	0.00429334371703011	0.0178703026371031
0.053796918097754	0.0768913713438678	0.0233023614761141	0.0269127358238251	0.00138339678366241	0.0109276818990853	0.0238444106553988	0.0816286709195813	0.0189377764223995	0.023056546426972	0.00179694030311784	1.51522620978391e-06	0.00495132544402545	0.00103201650609756	0.0134402006131829	0.00242066083161171	0.00424427165667612	0.000165721147952591	0.0143568705467953	0.00093203838936178	0.0101338787430403	0.0021363322257834	0.0121800042083795	0.0233921584967154	0.0329165657035524	0.0102517876528769	0.00453998857423237	0.000924101659938721	0.00161661758314864	0.0155739291618031	0.0104134585963113	0.0177839669361154	0.0058924597609505	0.00307207228765417	0.000421059278230127	0.000467404223386469	0.00389968681937872	0.000163442647811338	0.0021369689391238	0.0149904957343571	0.00488587326254775	0.00781144324610984	0.000880542891994482	0.000205574387008437	0.0222452032568849	0.0203597126792507	0.0139081483514154	0.00179117286280769	0.00749538326858394	0.00964273966528951
0.00988361750215067	0.0134136482004987	0.00188179663429111	0.00343972451513046	0.00999825567076757	0.00229682466405086	0.00362672902175903	0.00129245243843621	0.00282814275858872	0.000548471779769673	0.0152760914157645	0.0114356380529613	0.00083203096526756	0.000433503020361489	0.00822380843509167	0.000717144690217579	0.00120722529607958	0.00347069891607276	0.01508966309368	0.0267505826117785	0.00055979211202985	6.08358020594346e-06	0.00430233924341857	0.000653669707338955	0.00417008327501967	0.000105782143242688	0.0113419503155159	0.00388065215607426	0.000595110917386304	0.021694447865349	0.00636319350138571	0.00828911976512887	0.0110066437015323	0.0119944291483878	0.000127337948255566	3.76111694640263e-06	0.00215413446092457	0.0121625400949354	0.00195410058121442	0.0216630678736355	1.54735959095154e-05	0.00824572239167424	0.00272905151048562	0.00791969649844401	0.0212894345465263	9.37152952566491e-05	0.000161941432903802	0.00544037628343465	0.000127449983153695	0.00675358788213422
0.0475429507558113	0.116721786299433	0.00473725561845514	0.00398570340637043	0.01655190693164	0.00755684534829542	0.00165035696303019	0.000270868383298929	0.000461926491594267	0.00619618005096669	0.00267842291835218	0.00528580657019567	4.66209897589386e-06	0.000936830672068931	0.00539818536009619	0.00180020267908728	0.000246286819506617	0.000550643892094608	0.0115220490697413	0.0206780633104383	0.00139769287703874	0.0013419909001095	0.00130171532858127	0.0020200582161999	0.0155297288883437	0.0243015252545154	0.00821459781014098	0.00290621493351953	0.0208570351111632	0.0343913885996861	0.0149478161647009	0.0317244012858749	0.0167430616885609	0.0143585645911436	0.0340980829433776	0.00209149430041938	0.00331688267471138	0.0108145759009405	0.00852331425455191	0.00588930735838979	0.000860053555492	0.0453859467385695	0.0546294814794645	0.0356538460067876	0.0770982191416497	0.0439513008728162	0.0242727178393252	0.0315203773125812	0.0572819290286343	3.37053322292914e-05
0.00623464694413776	0.0160683272222932	0.00287398476016316	0.0199360520751544	0.00363548896770247	1.65288680998119e-05	0.00659659488940764	0.019149680365387	0.00684918036254796	0.00984593230877947	0.0107860943327714	0.0103929798780851	0.00283255105581123	0.0381431991203421	0.0341657380090312	0.0415437224344842	0.0155625448689237	0.035239475682669	0.0110354541437775	0.00865380797181318	0.0140196174298893	0.00945668537695251	0.0131366514293893	0.0115631493297068	0.0708561228213123	0.0124076405164674	0.0130092568329415	0.00534800066379856	0.0240456457314198	9.39627733594044e-05	0.00668319707478698	0.00986062420069458	3.24794029173539e-05	0.00482747844764808	0.0910565395726626	0.00108663301427725	0.0046620824244254	0.00153631403602232	0.00115122933604084	0.00789490694617868	0.00845425809407331	0.000501399480127147	0.00947830352659643	0.0172336566796083	0.00849437146381036	0.00844172955975521	0.0104659401317752	0.00011270296510118	2.54469470761886e-06	0.0158015914366484
0.00971672720547297	1.8669575206055e-05	0.000671341923119261	0.000462551276175922	0.00631315343501844	0.00415239434201402	0.000940011574647207	0.00014707062761405	0.000183659416221255	0.000584524939241673	4.48756151766102e-06	0.00475329234201317	0.0204722300768198	0.0215621670922488	0.00047065885573344	0.00294642759747602	0.00452038333813777	0.00646862576554268	0.0037949773231754	0.00957493916726183	0.000710733604882985	0.0120870130490463	3.64479122964513e-05	0.00126715267227599	0.00136887617721978	0.00176265819096709	0.0397690870557362	0.0134379415265465	0.0124858778080457	0.0409918835634754	0.0115410812469326	0.0451529949920782	0.0355103115828504	0.050367677275777	0.0062128143499276	9.26380819116251e-07	0.0120984986076563	6.41299975766588e-05	0.0055005594026114	0.00439883797151063	0.000512127697468823	6.96504002538116e-05	0.00499302704833956	0.000640593850818035	0.0216312881976483	0.0653252554204357	0.0165184467945248	0.00572794832646923	0.0457848909668799	0.00573601660067348
0.00254366818653961	0.0670005804912176	0.00527540989953904	0.0310412547383576	0.00402466377773417	0.0675724592892	0.0223315273968766	0.0513843096614264	0.00377470532829013	0.0283629816377578	0.0321530770579959	0.0562621212559047	0.00202359372430125	0.000329128868870136	0.00746066174646071	5.12724035017127e-09	8.20546572993664e-05	0.00705614619812745	0.0391339724129501	0.0746665736106666	0.050426100601679	0.0106167227536281	0.00204263750904893	0.00513651889052912	0.00769628925413444	0.00704946257372755	3.7644451155409e-05	0.0034250269939184	5.08140522452977e-05	9.54787594960736e-07	0.000283110312253264	0.000479075530458365	0.000144862828941399	0.00504898230331435	0.000973342203513702	0.010722703636934	0.0778279360784341	0.0316556057589501	0.00247849815125669	0.0096740912055432	0.000242900656612575	1.87652287306567e-06	0.0097490525762777	0.00211041177333638	0.00900341990215207	0.0144783878630789	0.000347583268214337	0.00533022466094867	4.04035678751942e-07	0.0445332942669218
0.00338040130460295	0.0481901321367056	0.027419574453863	0.00833582072341374	0.0132382120664209	0.0249398472616651	0.0042839746648059	3.88596486536719e-05	0.0110087019417983	0.0133829763772585	0.000268914207974716	0.000992029054739115	0.0017541951259298	0.0170132585690119	0.0391535499191198	0.00147010202821032	0.0245679384323193	0.0170281133379897	0.0560088034913249	0.00894688376054668	0.0195472340829071	0.00991645048543995	0.0125224364153744	0.00980094903469412	0.0117833478209851	0.0211304917494241	0.0195045426992959	0.00136553906286362	0.000908226751040192	0.000623043011321514	0.000110290058004258	0.00490247232402934	0.000301339839904304	0.000599951744896267	0.0103637390233844	0.000320351289752254	0.0123052137941958	0.00682700608177187	0.00329601811463097	0.00088306487665307	0.000642197806220487	0.00760805266390651	0.0062082848503385	0.00337137163214677	0.00727039039472151	0.0117525257114259	0.00365682870607975	0.0204459970463965	5.99322188295405e-05	0.0106171317991189
0.0126914677344821	0.0429948383416408	0.0030699655840845	0.0292283740955179	0.00121280705387234	0.0152074255150387	0.0385860809830018	0.0162379738653273	0.0278831383407172	0.0073364838539942	0.000113243206448189	0.000472384771583031	0.00134453790227956	0.00682929878604541	0.000219320300608502	0.0189316246169776	3.8949288076492e-06	0.00218667381350793	0.0211972994806444	0.00553098237397984	1.33725172013837e-06	0.00256326477593779	3.9058132150692e-05	0.00422877607913928	0.00991495632353226	0.0120605000275843	0.00847449784157801	0.00204954241907814	0.0135922389455821	0.00305474077926173	0.00596935556100462	0.00377405005939138	0.00645121127544291	0.00248570532040281	0.000203900821594643	0.00200461258498876	0.00442206982159215	0.000749553955714944	8.65833090575056e-05	0.0057457381700054	0.000245002067681679	0.00330925110552905	0.00341621641032952	0.0115442524459618	0.0177358076273322	0.0393210892659221	0.00623997982164507	0.013565458789654	0.0160697745048688	0.00650158913979157
0.0151824453510545	0.0647197579901388	0.0224520408938387	0.024416219870682	5.61692993439212e-06	0.00498766112576978	0.0295033535144607	0.01366032311693	0.0271664081722874	0.0351299691594602	0.0171361316528033	5.39935069198768e-07	0.0221663320290636	0.0259426103097831	0.0496333065157979	0.000130535404795846	0.0310687141879318	0.02907912497703	0.126171392394962	0.000366532699326422	0.0314271780087162	0.000430563868469265	0.000233297268532188	0.00460532424240226	0.0118031357963404	0.000720507862250831	0.0224550886729103	0.00497411099906636	0.00225605123293964	0.01187573096555	0.00753122694614647	0.00954295269050717	0.00412847079754378	0.00145789547871753	0.00116935616283508	4.27385924355424e-06	0.00340992866379791	1.86263760711016e-05	0.0039816364589076	0.00599078337315208	0.00253104166372689	0.0464121213736442	0.00395553463350077	0.000974902378355392	0.000329927489264382	0.0144948368382239	0.0205823913078352	0.00520665503667101	0.000422508888297359	0.00731485426519589
0.0563263200554245	0.114400540572644	0.0721060599904054	0.070818055597835	0.00213827142337943	0.0787565685913822	0.0763984716902942	0.0666077949559092	0.0512795436104418	0.0319118913985773	0.0148051684310942	0.0225259831342499	0.0135832614851971	0.00990631045586008	0.015521408114631	0.0103286154313884	8.61632386005229e-06	0.00375323480167772	0.0439657264649966	0.0171060438165166	0.0221140885631716	0.000408223595465219	0.000164292615708965	0.00330431880379599	0.00353134907813249	0.00300929709177542	0.000562557179473987	0.00209077130211596	0.00499414124715907	0.000684689585071957	0.00363474204105793	1.35820062812956e-05	0.000840037960156364	1.38609671933861e-05	0.00399848376146123	0.00862276071227318	0.0359674655432514	0.00339451538629843	8.74692792143583e-06	0.00241986805596224	0.000526785946260242	0.000557792946719847	5.15714374968919e-06	0.0116963300931954	0.0125624003374861	0.00778291115959328	0.000849253072892882	0.00938473761601647	0.00310819880853584	0.032967226404189
0.0327700266480874	0.030583889382093	0.0396367454000138	0.0195196856056321	0.00454106904210154	0.00708281093744704	0.0291044599929651	0.000253498777990936	0.0321135009922	0.00441113341810751	1.87195110143875e-06	0.00210037487951844	0.0066396056070798	0.000713761884450247	0.00946923991839073	0.00939782054112973	0.0037604036441839	0.00049090642517036	0.00359328891239425	0.00334024040739554	0.00165033484855096	0.00195677900131535	0.00165447973803664	0.00453320412532817	0.00203377816811197	0.0050061189398251	0.000331085479801757	0.00642563639069345	0.00552696515745825	0.00258796739932166	0.00778451308415838	0.0482425206288263	0.000228217166052447	0.00742644014531654	0.00883295378469444	0.0151117791626787	0.000487917185161221	0.00266661539792743	0.00503648210910392	0.00677784852897003	0.00677466950789833	0.0231542754556153	0.00104863839525532	0.00516207354219884	0.0014163428229519	0.0390160783549212	0.0186759101197549	0.033340003689082	0.00193675094713368	0.00559523701249712
0.0108874165931822	0.0249313408330345	0.000474478894676785	0.0337741564057755	0.00697240046980332	0.0151542416303208	0.0160575865134667	0.0008293667841481	0.0107111770136407	0.00168346801885214	0.00894760262052422	0.00199551300429133	0.000446194008609135	0.00208264541135731	0.000189959999111706	0.0129533506106974	9.13502643105099e-05	3.38106280655186e-05	0.00991917159903866	6.89726505077021e-07	0.00166918846592628	0.00145315598337635	0.00120782989532941	0.00987473788230176	0.0145953704193888	0.00154796020364148	0.0125471533759797	0.00359678950414874	0.00628674438996547	0.0077508509332967	0.0179408618910561	0.00287351111976774	0.00851441713018887	0.00851114292321257	0.00844524093673757	0.0141854700981714	0.00214706009347382	2.35829066182504e-11	0.00816078006261979	0.000599898681117603	0.00426572507444415	0.0388616075690628	4.0034572211823e-05	0.00082184446989048	0.00109644166477498	0.0150640389874354	2.42876902061399e-07	0.00473924528973942	0.00164054815077089	0.00338674245420534
0.00688386846341067	0.0534490094897584	0.024722253055705	0.000451709876687542	6.73821284213259e-05	0.0136619070196033	0.0181345248797401	0.00207229221281246	0.0171497865431491	0.0106768754995586	0.00424543696932149	0.000169658656224961	7.48636114578276e-09	0.00203044707126561	0.000304282799803312	0.00362857720267997	0.000265475710696191	0.00451040165259729	0.00195712909886359	0.0247314516951707	0.00276507087441216	0.017698588253793	0.00337472921068373	0.0001001448436028	0.0249257681114504	0.00210960317551883	0.0233154357004163	0.0191982766227122	0.0459824400674047	0.0712681102599556	0.0756769370354016	0.0687012073278397	0.0598089029847478	0.0435139859180642	0.0324399924933808	0.0559073603205261	0.0295275485442724	0.0189901761541342	0.0523635531350746	0.0191089300408837	0.0223731883724716	0.0115494515838701	0.0635715397464919	0.0371891875277325	0.0244803827485683	0.013518203582165	0.0645207134826271	0.00865533062261069	0.0498558433527114	0.00317967843643414
0.0476827649048457	0.0562171987021809	0.0218480968984644	0.0237733016081566	0.0278042040837531	0.0253626598158413	0.0442780486438441	0.0249694072081352	0.0750520389839704	0.00454667257953134	0.000337731041804781	0.0146033250612818	0.0185293212300199	0.00507694860567717	0.00964073288158416	0.00901140016571789	0.00986328107785818	0.00538345753361559	0.00824306542140442	0.000711573014034236	0.00270910591438686	0.0133274382621231	0.00829343048943772	0.00875907187133608	0.00119109740747029	0.00381081143735647	0.0041231137711226	6.76498951271762e-05	0.00613445038573922	0.00295654585561117	0.00574362951223376	0.0231963711978937	0.00202977894272161	0.0102533901807066	0.0155809785794458	0.00089689790109025	0.00500647958316375	0.00216478103734911	0.00909233597597497	0.0158368883420661	4.23448967899819e-06	0.0712741913696897	0.000537814395178053	0.000173467873996905	0.00965466576855475	0.0535174623120782	0.0133800918673295	6.9446209811302e-06	0.0166694358055635	0.0150450512795656
0.0104169883290945	7.12759288036126e-05	0.00276761302849822	0.000852673593523299	0.00032921262814197	0.013406954265809	0.00339096916778231	0.00775656596759808	0.00160563891613427	0.00273630736935454	0.00382345534852943	0.0007873825682327	0.00949853575701218	0.00151485685536721	0.000119957872183365	0.00204743445409282	0.00119999344083948	0.00111302471300633	0.000900052132609913	0.000409555507517249	0.00206050655045746	0.00293215556207608	0.0352342229587354	0.000150035375259937	0.00364386539883067	0.00583842237446008	0.00933013765589671	0.0203793134263219	0.00116872279000122	0.00767800553615165	0.000100618496019208	0.000227452924754132	0.000211939708748833	0.00586915149691711	0.0229564331352193	0.00389875511064232	0.00218084859723055	2.81570528520362e-06	0.00253603872825273	0.00110682485222459	0.0333582493296035	0.00503113544551486	0.0245678408221487	0.0486239337073344	0.00166210345031061	0.00014422668089138	0.00264478326291781	0.00161498274041582	0.00307731635876303	0.0146439438310777
0.00072259367369446	0.0236461148488475	0.00336614704189412	0.0259225211848575	0.00926860244412824	0.0115153897634242	0.0179560034470056	0.00756532765835349	0.00240092619986544	2.98179174682409e-06	0.00507141405547449	0.000663920903038666	0.000435234113207143	0.00459462194344368	1.24711308745594e-05	0.00174477117051081	0.000291105909306062	0.00186822981256132	0.0326458265266242	0.00924742894158933	0.0306536043157202	0.00122286803446858	0.000211334043237805	0.00699954010110326	0.00265337406364089	4.35799609887324e-05	0.0113061461821788	0.00557802931125162	0.00138826042628499	0.00222427947009267	4.30709406389814e-06	0.00135631070154027	0.00025645092747888	1.31154116123539e-06	0.000129083322015202	0.00692996251672985	0.0125235991105694	0.00735409277660517	0.0113054891718202	0.000743687293250781	0.0121298396948723	0.00189656406504779	0.00831353941231348	0.0152385939358486	0.0011724827496797	0.000209468445468574	0.00381887213198989	0.0215682621148303	8.24699782349159e-06	0.00206142184340506
0.0263972514568973	0.0722183453898449	0.0221821490971804	0.0414442128285926	0.00582629374013973	0.0227373476450216	0.0432535484081984	0.00270316499109359	0.0102968423275374	0.013266797674381	0.0108643795036446	0.00431628572553657	0.00183054060596548	0.0148044445027226	0.00199040160223052	0.00078368887824995	0.000533550139283357	0.00166033962187899	0.0215444256632245	5.46202532305142e-05	0.000953866140232021	0.00236973110712462	0.00135751748363002	0.00298010173802049	0.000652779776601867	0.000192007453838309	0.0268218207817569	8.05790765095008e-05	0.000456568315394911	0.0154867798357536	0.0345912006449507	0.00107220864771699	0.0100527283283006	0.0156784086886166	0.00237327834173714	0.000839022522571502	0.000563638019022468	2.64480914552365e-05	0.00988325804708332	0.00439529536468854	0.000364126453540438	9.99661760176062e-05	0.00151980494935302	0.00927282123472079	0.0125464600171393	2.28675249051524e-06	0.000622280605871861	0.00368508918483917	0.0108496378345121	0.0321275948127581
0.0156965782038571	0.055210949116681	0.0132665342089358	0.0291923098385983	0.0158563402366864	0.0243729625542058	0.0250200640115287	0.00964809958488379	0.0108471039136474	0.00041647176706348	0.00580152913654435	0.000357767486465479	0.000783792140433698	0.00784707050885818	6.05439594699306e-06	0.00645131808903006	0.000461961298798718	0.00332458496248021	0.0240467432005236	0.00313527022198297	0.000488511465158477	0.00888722070160383	0.00901051947123629	0.00342271107773862	0.0021989865432664	0.00207649684221171	0.00163610667207187	0.000330832745057646	0.00312875296770459	4.31288372686994e-05	0.00277660351172385	0.00134306142236225	0.00508625662275406	0.00242158158350544	0.00419961151448785	0.000143008265556884	0.00255579030199886	0.00402550804684217	0.00286704990930395	0.00279708791250221	0.000533133622348193	0.0117081048786986	0.00166627694333993	0.0202763250870927	0.00576556846348108	0.00724241499740607	0.00165487130267144	0.0109468189591563	0.00119363371226341	0.00539910695338363
0.0020067705410217	0.0128993012522332	0.00500627672047858	0.00561344617935639	9.48344114035528e-05	0.000242099678672588	0.000457184304952811	0.00270876957946729	0.00055529475702939	0.00220227512686912	0.00479329792913212	0.0100507498951343	0.000313499835553023	0.0050294440265368	0.0167917093962635	0.000894731852299826	0.0156089912389168	0.00705119311577262	0.0178854553353837	0.00767063421339585	0.00011664909534076	2.1416492611587e-06	1.32180709379791e-06	0.00114242184366239	0.000230649053174738	0.0197755247353505	0.00139986322443618	0.00853928273150734	0.0019570714297003	0.00234692303999523	0.00339304514413781	0.00219954812029058	8.99695751152719e-05	0.00385159787590487	0.00465045360982656	0.0129582644882276	0.00790419471291494	0.0126121647188742	0.000717561956226057	0.00539822578625626	0.0260338442302622	0.0155545138654272	3.56939857659921e-06	0.000298727015744352	0.0112789304623531	0.00589764298386906	6.63487758648195e-06	0.0150850039659557	0.00019677790047987	0.00130234164671764
0.0133478076201924	0.0199176263780474	0.0393158092620292	0.039061504932492	0.000412696381174998	0.000791604891756366	0.00262224753178481	0.00835646384367815	0.0301204122240552	0.0132894987561213	0.00670176515897084	0.000987449594186238	0.000700491427785422	0.0937534853196949	0.0555381929595706	0.0252347880612833	0.0325548524696636	0.00274683608161888	0.0362169696836881	1.04206427918053e-07	0.0442188070851774	0.00216438070855104	0.000669704021364588	0.0353684290747283	0.0371994082867838	0.0568829164569263	0.0808420457586853	0.00381495088625969	0.0223138032695608	0.0379984910635397	0.0280761808673958	0.0809127413094506	0.0920331591407929	0.0622019854533215	0.0837463499253134	0.00270237223924049	0.00101915079619437	0.000251948276411472	0.0542854420957478	0.0146013529649374	0.0132353345035122	0.00224114438149502	0.000200119164343478	0.00318035665199861	0.0108892982394108	0.0919290681098342	0.0155286414973811	0.00882341390723809	0.0536622302921506	0.00481685708236834
0.0278902586846172	0.173580299606089	0.123966586098953	0.0541194438161701	0.00400495456180129	0.00792666971404322	0.0511323254730475	0.0395035079616405	0.049533403505051	0.0312252137331659	0.00457274670733473	0.0232546756291435	0.00846617797057906	0.0158102167914125	0.00261556085334192	0.0120878343617757	0.000380830898377411	0.015564414605279	6.63081080322455e-05	0.000333803803151692	0.0123283118586176	0.000679937839989662	0.000753621067140771	0.000768460387568905	0.0126356218254081	0.0154909515431179	0.0848930142107273	0.0270984581596315	0.057040988852744	0.157320746155245	0.0657794987547277	0.187302704143814	0.197666917361184	0.153429445824174	0.0954990576226127	0.0281270661918595	0.0224485951609211	0.00301240054326303	0.121400624185024	0.110161456983024	0.0831486224144362	0.000111397623680859	0.05019375277713	0.00200590225347944	0.054819105789679	0.115561284307896	0.114933224560168	0.00374571901764829	0.144207142479556	0.0547052764967752
0.0249195812159132	0.0335852751363158	0.0207510162082564	0.0740230196065815	0.0305142553126269	0.0219248040165862	0.0479984599686847	0.0453613984088201	0.0304388848707793	0.0019304206550451	0.0145998835599661	0.0632769146714408	0.0364626688562583	0.00227464415016505	0.00911794239860659	0.00168504251015885	0.00497482344808877	0.032040786733826	0.033397077277971	0.0313719340727562	0.039279691132063	0.0226711779300632	0.0308819633999868	0.00211825717085321	0.0222108856864305	0.00167452502173222	0.00714867837048141	0.00523858926513807	0.00248145534939628	2.39605206385762e-07	0.0025821639935475	0.0277510996738118	0.00679918101888061	0.000305871902079737	0.000908686446997435	0.000259834709336082	0.00146344760961787	0.012405960992213	0.0118188526299006	0.00636100086026228	0.00742791528150438	0.013433765938771	0.0278508255070089	0.0116336969367259	0.0194510130743477	0.0715389762346657	0.00594474719951857	0.0172634266696939	0.0421075329417284	0.0236097598666425
0.0017406702811306	0.00711223049851459	0.00230849901823952	0.0200703448895996	0.000433727975560993	0.00148900874582344	0.00395325565296268	0.00207448386892113	0.0133883647919675	6.13144314932099e-05	0.00441153965389541	0.00010236395762643	0.0131364542572529	0.00691052003433851	1.32557853735215e-05	0.00220383083511035	0.00656435981090638	0.0011112042416892	0.0028052765846107	0.00783405538159576	0.00261094181689669	4.12170036418018e-06	0.00192802048679849	0.0224792896374229	0.000703116258844524	0.0010429942117863	0.0034492722983761	0.0200959466568366	0.00756185582662377	0.00418510881871715	0.00107893671701394	0.0430077751075678	0.0251073049326539	0.00689295425037062	0.0316335021553142	0.000422392437132876	7.64799147670393e-05	0.014384905792606	0.0574923058074284	0.016899795305248	0.000170547543338641	0.0446628120220942	0.00477964218315641	0.0329298361689102	0.00908757063428597	0.0555236848647259	0.00555018868206768	6.3931483781352e-05	0.0472441450256323	7.49438323295334e-05
0.0346132479564783	0.0859811873806906	0.0581601547545988	0.00711319194061996	0.00234593703827482	0.0028733200715788	0.00881804209467021	0.00156889333973928	0.0304732525536207	0.00176304379393595	0.00502599144154676	0.0338533345022156	0.0360625259003087	0.00211335767777853	4.5289779559859e-05	0.0023481117263022	0.00773612571549132	0.000463795280734924	0.00669827305859528	0.000223018539190021	0.0102077521551703	0.000595903303075587	0.00899252703085005	0.0068590856781414	0.000488668062826034	0.00295830182520599	0.000255843233341685	0.00186768795591745	0.00119680081059154	0.0110754808516363	0.0073917778561333	0.0781995078776637	0.0306683072917417	0.0121352649899807	0.0274321217547381	2.84596472024133e-06	0.00499351674791524	0.00398920282216651	0.0185349165326098	0.0211907448375309	0.00887252707778604	0.0260320338157299	2.36321311046562e-05	0.0182732425310177	0.00827768535382302	0.0891057177797541	0.0284791545422692	0.00120741878169543	0.032138188840632	0.00457960517046593
0.00675156630369175	0.024581807747291	0.0143932321169884	0.0403233365094932	0.00670198782003219	0.00819291670203016	0.000573460866783752	0.00277897323732428	2.44977805770997e-08	0.0163961451376407	0.01705436947666	4.51759851060804e-05	0.0114807204437425	0.0466169853373865	0.0153346122087353	0.0431869806019519	0.00599656733349211	0.00178148830141305	0.00833405757417422	4.28019905964578e-05	0.0072057628948815	0.000225953578465733	0.0033176222645501	0.00944045352967163	0.0272703767394191	0.0213105764205695	0.149769067495147	0.0397252552881153	0.0598892121191885	0.0500701357949905	0.0184990278387493	0.109062143632334	0.144622970330126	0.134529810143516	0.0543029708694757	0.0305349419383838	0.0164423788851772	0.00546779668378231	0.0530169710879267	0.0666128779392193	0.00680522648012333	0.0106969206466837	0.0411309552771176	0.0193332131055961	0.00854662239795567	0.111615970608887	0.0672148310103712	0.00654013046362858	0.096827865133364	0.00870398581567644
0.00198213069239523	0.0420401264979147	0.0185830305707987	0.0155128955010633	0.000776984494617201	0.009700126538509	0.0269871114951976	0.00367397391738933	0.00595870249465099	7.59900913773987e-05	3.50932399614247e-06	0.000294654459527094	0.00134369349911946	0.00921631352914767	0.000453788281191374	0.0386183557431375	0.0124585593446533	0.0256769841045424	0.00249526628713323	0.00302389466223423	0.00128233914861641	0.00457971712579169	0.000274233988224611	0.000583884211562143	0.000286954750000694	0.010429651912065	0.0443063337243116	0.0231214680252342	0.0332822121670461	0.0573282638359071	0.00613645232097063	0.108202397009195	0.114645386308643	0.0550414671021952	0.0261206035505287	0.0247880073457807	0.0452102976585174	0.00616779335721988	0.0122774712650701	0.0483560025688626	0.0417632051713334	0.00188310604093997	0.0274686589160135	0.00514866748049372	0.0107767316952219	0.0369250095447484	0.0404664875280688	0.00336534303698158	0.0412255443887882	0.0134567150861213
0.0105515163452493	0.0423249416112648	0.0087694242541773	4.33372369847513e-05	0.000490632752294372	0.00486131499388655	0.0186698723441613	0.0139125159936752	0.0127897127686419	0.00589372234485526	0.00015708676669997	0.00126160275367623	0.00459305853433993	0.000952735965901346	0.00305751249911374	0.00843414800555635	0.00220926432548269	0.00739276299920993	0.00778814389309613	0.0224097432976578	0.00419796556624405	4.9021482502638e-05	0.00821787685406657	0.0234490919142006	0.0157145718559092	0.000189267022785583	0.0223485549467584	9.55532151641089e-05	0.000339687092225654	0.0021353087752506	0.00253653804376948	0.00409780462646336	0.00540676949297799	0.0152980648893148	0.00249618924932925	0.00764289803738795	0.0152113351682696	0.010328447800588	0.0149042719208903	0.0162453250964147	0.0222035381954643	0.0018515310428625	0.000476566446716419	0.00384601953687586	0.0168818189854676	0.0122106143048215	0.00262453323150827	0.00353547955666242	0.0645215812821554	0.00400921708938247
0.000833012179584255	0.00230356008858755	0.000125407530818251	0.00559219723075997	0.000626841983909411	0.0176990041419616	0.0058704712391434	0.0079957324996422	9.13447537485105e-06	0.0116122089185359	0.0116411956220424	0.00907040497600521	0.00205107198163699	0.0107651871744106	6.94486167488726e-06	0.0172530091589508	0.000354821100445246	0.00061197517887777	0.00853476522796554	0.00229000453626904	0.00149897022649672	7.66092405838154e-05	0.00268825603475506	0.00623818479348807	0.00277380348479277	0.00366890353205886	0.00889356640149808	0.000630647158384711	0.0345706458590204	0.0368945596632883	0.014803715581044	0.0571019277552028	0.0288914300447349	0.0253358110186063	0.108303221851972	0.0237023542742833	2.23201607345197e-06	0.00281027398001114	0.0235146057617078	0.035679226940212	0.00529465531900808	0.0391576807783858	0.100980076983373	0.0790837242683053	0.0282753460457805	0.0930332926922744	0.0402126089188159	0.00962311265320535	0.104645892919074	0.000221934809827578
0.000230365438047691	0.000963976056953735	0.00594095079672003	0.021229028936986	5.71914582380614e-05	0.0106023062364527	0.00137436935430331	0.000451437208829228	0.000964591043149972	0.000920056587482746	0.00219604160237679	0.000734408102424806	0.00591744904147835	0.0232274158853601	0.00423708264942678	0.0259772749314279	0.016000372192976	0.000151134118223922	0.00504981642090437	0.00322440809284319	0.00273607225242094	0.00542044407355217	0.00894516548467522	0.00716747236152183	0.00213309185228091	0.000613541752863978	0.0476976182716791	0.00644928021953122	0.02625767029129	0.00254145828135127	0.00188867433397012	0.0264483340206713	0.0161928696225996	0.00963919691652939	0.00781019764464146	0.0010778959958822	0.0177108927192621	1.27598829791255e-05	0.0248502786753369	0.0390869153551403	0.000125877970444267	0.00259352705492096	0.0195616297982365	0.00562332665716388	0.0179779279973506	0.0735348208371785	0.012533851144709	0.00233364736578029	0.0621221018818443	0.000594207703817142
0.0231696342188878	0.00703782987020308	0.0118738851107362	0.000276723711493916	0.0280688304601921	0.00447150718765744	0.00311840623073776	0.00339626215961778	0.016458895189348	0.00104136075002608	4.07630345912938e-05	0.00633919560107052	0.0023107964806132	2.75017760773042e-06	0.0273080231960343	0.000487482052788675	0.0225775494514199	0.0165783479420365	0.0111945675599902	0.00619722498430248	4.31983449582733e-06	0.00712129638065209	0.00179412001474819	0.00143334610760037	0.00159651454854501	0.00169314036326282	0.0337424844093097	0.00277376490081605	0.0164441421072472	0.0385663431781418	0.0138677109404935	0.0519646346844799	0.0116566325122047	0.0480710484969403	0.0483261268504703	0.00305287450347673	0.00601997081182648	0.00565323003018852	0.0156273694115748	0.0293186798086512	0.0104251137183573	0.0487441421099462	0.0215612713470983	0.0429508552267831	0.0125888619586167	0.0780932340895976	0.03877911655596	0.00164352927808714	0.0399668349590145	0.00618545807564795
0.027657196700912	0.00320774853591906	0.00329395333297546	0.00781996654870265	0.0726723782941258	0.0018332040510148	7.11398395406258e-05	0.000686636260863484	3.17705710473347e-06	0.0061991089294131	0.0038522261969755	0.0159768354772828	0.00337202832655706	2.90613957705159e-06	6.35589705829595e-05	0.000246406524007236	0.000124101112291309	0.00976354108120333	0.0127876315676774	0.00548235282749729	0.000974130119073902	0.00131623960668329	0.0001316057820088	0.0133820287833101	7.56989317903795e-06	0.00163248838909729	0.0061867962374431	0.000288257471454943	1.29417978461641e-05	0.000590801958078861	0.0012991023949586	0.0355750019768098	0.000881946129139461	0.0099442182743814	0.00239017631587159	0.00295893009592431	0.00261444618692491	0.000671054524845078	0.00643540286057554	0.0117089845289188	0.00537720340372445	0.0353162499515352	0.00401621416828949	0.00498852255487937	0.00758371422165318	0.0662011666208883	0.0114454964618155	0.00280494425278113	0.03147364815666	0.0196579713385632
0.00119565858873686	0.0106151410949402	8.96935212571685e-05	0.039072784568789	0.00726997935747714	0.000152669505102316	0.00258013183977879	0.00846680652582201	0.00100413133689707	0.02200202756183	0.000824890616199609	0.00298489975503856	0.00286670685257486	0.0263443798427709	0.00777081066016123	0.00122217847778894	0.00335786907467708	0.00369311686358781	0.00106062212599285	0.00557131913528718	0.0057099133603411	0.000552853316321729	0.000417852924996217	0.00138103518133982	1.83379940685055e-05	1.98470284500429e-05	0.0885141516380423	4.25213777819742e-06	0.00401289413649177	0.000899471915590588	0.000499019636573328	0.041438697283953	0.0603354108783684	0.0359626485826584	0.00534415284958418	0.0033803465936135	0.000152975568153591	0.00114714425730871	0.0468372976502027	0.0127379185266038	0.0303752715131087	0.00269485503697509	0.0305847779371115	0.00598974148829221	0.000304619656850871	0.0486076379448631	0.00110716548617819	0.00185306157142114	0.0543886630299921	0.00306815578496086
0.00175189809926212	0.00125400047518736	0.00166136164216257	0.0336300887684472	0.00284483396729389	0.00732028100262307	0.00130851082390953	0.00134116320523609	0.00186145194887389	0.00964179566918943	0.00063055826117236	0.0305766522262974	1.83965050849635e-05	0.0170905325570118	0.000486396254744585	0.00259751882508581	0.000153491404857952	0.0143392116857226	9.2725809916979e-05	0.0260061082773121	9.64993866408507e-05	0.00138713155947478	0.000412648638541075	0.00061969503197609	5.89459873069155e-05	0.00588011092261549	0.0925861786390753	0.00268652125486216	0.00490609594933445	0.00028403039223955	0.000611422879753175	0.0322503999296801	0.0388742051930975	0.01204227026776	0.000294474181071219	0.000347103524027866	0.000206114038180696	2.05478494045401e-05	0.0390901302845149	0.0162987732340162	0.0182238302321682	0.0037748363748732	0.0217300617964138	0.00323327509322158	0.0119786275681345	0.0782114266125585	0.00206913614334117	0.00555989937708691	0.0418137735675305	0.00442165744960857
0.00144095921758502	0.00302082974926408	0.00332202911309368	0.0641253947511287	6.31973729073302e-05	0.0145238987463894	0.0221258829908474	0.000455735127205661	0.00332421377377046	0.00191519399018651	0.000823812184313951	0.0150861475423368	0.00601009133692705	0.0259083268006699	0.00449333051390958	0.00318019062056075	0.00127673912488816	0.00469952377796729	0.000150693620764089	0.00427037557925224	5.10831867550134e-07	0.00329724404397853	6.87275997069618e-06	0.00131843407830142	3.96324483901354e-05	0.00104746344794192	0.0868403483876186	0.00142367520268825	0.0088091106555314	0.0528712148868601	0.0384013019416293	0.090216129926252	0.110328049644473	0.0858755565606434	0.00238775983516295	0.0309360689652002	5.37072423991143e-07	0.00054765560984604	0.0644593655925986	0.0413648872705898	0.0153461619295555	0.0038874117800437	0.0111548191110698	0.00556618793867802	0.00292871172413915	0.0432186558334221	0.038184121681204	0.00360620145840187	0.072808903235682	0.00268664451811856
0.00188752655902434	0.000949977222587625	0.000354728545184678	0.00980802786428427	0.00253901799727914	0.00309736246027792	0.0172852267861991	0.00312351306550112	0.00019237056724931	0.00425066343811242	0.000503093393359064	0.00141062041651178	0.00182316050840753	0.0025934323555441	0.00205062350659918	0.00269321357516473	0.0300623974045928	0.0118099426350626	0.00136368415723379	0.000192875813739344	2.44600662047541e-05	0.000987764369439941	0.00115587307133943	0.0159142928944587	0.0246857778439563	0.000642314420640347	0.0100992580700686	0.000481660778637808	0.00829383016704752	0.00562746868749272	0.00261389631863576	0.0117116326810482	0.0169301835652883	0.00861082422367072	0.00756373922937135	0.0172490109033049	0.0159705597054674	0.0171282803154323	0.00223852113578674	0.00434267903876778	0.00055348307262992	0.00305613768573177	0.000803972400020244	0.00696288980364451	0.00193589076705049	0.00328638461003509	0.000483543336447214	0.000113302015849963	0.0107268346720924	0.012259850928545
0.000380564307318146	0.00144885968196935	0.00423590227251452	0.0717294886786867	0.0146185128932962	0.028976094441735	0.0134387627113009	3.75151928652282e-05	0.00200208605067652	0.00395130891803655	0.000461165955197396	0.00999052023630592	0.00147839861734914	0.0147538827209718	1.39530902841503e-05	2.0448894243264e-05	0.00124980042717051	0.013579120267989	0.000525537663602765	0.0130106569265504	0.000725151002786654	0.000552335866332479	0.00479445629908664	0.00148232710762375	0.0146463686696693	0.000284374134434176	0.0767834283399393	1.49556704714475e-07	0.00759654640682113	0.00356230366952747	0.00129018673388088	0.0325278859729058	0.0445039596499819	0.0269185472148081	0.00245343397633177	0.00211305470206219	0.00533500371944384	0.00127745963878837	0.0436122491002162	0.0355992468865234	0.00971589872281582	0.0147013558373532	0.029458186337901	0.0251386183058002	0.00754423846266043	0.0326541868326861	0.00210676817493048	0.00321625819116076	0.04589400449486	0.00358830328961636
0.00168366721068509	0.0226108050304686	5.77379345340755e-07	0.00915882021835214	0.0262396577500315	0.000787638242535698	0.00551271953903565	0.00662132769987022	0.00136599207906259	0.00858453951610008	0.00197264433373216	0.000295424106609216	0.00431885715016269	0.00978726867206595	0.0175039222376805	0.0124628331683741	0.00616261386084419	0.0013628274028055	0.00265958737314703	5.48678973006348e-05	0.0107242023837882	0.0223842437151604	0.000440129137988192	0.00366610057678507	0.00258813410391839	0.00026991019267769	0.0758750443592281	0.0136893872156977	0.00267292532898493	0.0224453706996045	0.0184015695874712	0.011599689167265	0.022265451166687	0.0322180817462234	0.010415135770374	0.000551882344082079	0.00600365164540908	0.011221644458038	0.0227039619920784	0.00391193060256207	0.00215167635858287	7.84234072161726e-05	0.00778591161206388	0.00676972411948065	0.013840718425349	0.00197862607345708	0.01121646455289	0.00974136489323416	0.0215730514134638	0.00334097708341045
0.00328481977638577	6.69627500680793e-06	2.87908346744396e-05	0.00971198256337703	0.000216329164047679	0.0116562305435429	1.09832243982602e-05	0.000293292800327529	0.000162978609099053	0.00111849452404246	0.000128290053376024	0.0305742711777384	0.000368872539658615	0.00679859469098511	0.0125099274925462	0.00173405066525336	1.51635169514338e-05	0.000818748614143533	8.09680396979762e-06	0.0205998296001401	0.000848669205569598	0.0235027826771093	0.00244578390491313	0.0102481213562831	0.0115205163340662	1.48030074656893e-05	0.085063036561043	0.0153580279686146	0.000164741865455914	0.0468353434829732	0.0436425097392571	0.012909498966111	0.00271213875129209	0.0231656390098604	6.0397453436238e-05	1.01615607351326e-06	0.00240251797227635	0.00666273895071212	0.0658361094434403	0.0105785697813081	0.00519658641899387	0.0120723030467102	0.0474716404606637	0.0045904188948017	0.0801841154502376	0.0393186523558313	0.0304661849012128	0.0203275287007327	0.0835297809852854	0.00748822697922993
0.0204916769476804	0.0176137555186701	0.0389925541468052	0.0339907611149187	0.0313608864858093	0.00856122639881547	0.0183966387933055	0.0347305727966518	0.00773791408962421	0.062910559584238	0.0150999482392022	0.00174708440655665	0.0295960869752458	0.0300903643377705	0.00301013872273002	0.000535988770372693	0.00193391888479631	0.000848499829912792	0.0003107456791642	0.00785134801923413	0.0386846090334492	0.00201743406908899	0.0189860536481804	0.00201022129053805	0.000279250689588585	0.0109836321673889	0.122019750578672	0.0092279707894088	0.0403633215967274	0.0544541443628809	0.0433526161529334	0.0397962563918044	0.0403916255793153	0.0306976707465032	0.00453819027528249	0.00957550017638545	0.0130594675873949	0.031609987553965	0.0193562343932019	0.0299584822041622	0.000129989475004063	0.0126121440982991	0.00886920491166426	0.00218984777372102	0.00946554628916553	0.0370100132552273	0.0130547449529209	0.00107935296357643	0.0673041328873159	0.0572730400661795
0.0155415047885961	0.0223860538292347	0.00326106882181691	0.00470945468897709	0.000205155048476485	0.00503280608714634	0.0259995490154814	0.0187887117279551	0.00850571056171921	0.0253208397804821	0.00569667234966575	0.00113778279784235	0.013422381742843	0.0118209381468452	0.0101246469818551	0.00298287972442162	7.81970203915469e-05	5.04167186561415e-05	0.00917858292494512	0.000119408280268239	0.0457559484736746	0.0422781627414852	1.64436810174628e-05	0.00514657782035557	0.00239313619776883	0.00295856763041219	0.0615449941099442	0.0116478196844423	0.0104821182836709	0.0123335733141723	0.00402810439360783	0.00344527709619845	0.00290930968172131	0.00716556894467677	0.00588045785472132	0.000357825878390608	0.000216770122195594	0.0212347583020205	0.0140423204537857	0.00981311668420961	0.00482155049765295	0.00194852017329679	0.0318466171326138	0.0111576782431153	0.00782196489764235	0.00536628746813222	0.000223886896424594	0.0163494288349113	0.0278825513550385	0.00233975354753031
0.0125505410785133	0.0106234822974019	1.1917637846167e-05	0.0147959157002522	4.93637533964734e-05	0.000815510175967837	0.00457780885728334	0.00131250749592018	0.00175978014145276	0.00351489554767216	9.30331887623114e-05	0.00613179899951049	6.86615012267085e-07	0.00785454629698654	0.00203739835303498	6.61543944915287e-05	0.000306289682236637	0.000429166779661552	0.0067065050916697	0.00115322410471652	0.000356693504765822	0.0211952012253796	0.00256726628240336	0.00641458805487596	0.0727169431237695	0.00048743993179754	0.00142477933287144	2.6452427700985e-05	0.00400840005001012	0.00152386514779724	0.0068967340782779	0.0402028102912109	0.0222538317175325	0.0119282329278724	0.0276708766403435	0.00463308618947043	0.00814560934054289	0.00132732776688008	0.00406330318913005	0.00920937823165887	0.0117123261561663	0.00107556456461124	0.00154648585389979	0.0145854828399642	0.00801317570241041	0.0135388025940634	0.0109875300022928	0.0164913256001032	0.00456185911072921	0.000837466765234392
0.00097138501232121	3.69239268246486e-07	0.00673888468612333	0.0120717992955022	0.00133984190976953	0.0210332150764636	0.0261796667416418	0.0190693157742588	0.0021412888381797	0.0400467909534855	0.00909374699581436	0.000538719090258828	0.00736348712113385	0.00478958686778799	0.00719536066816111	0.00303912386344476	0.0218391486352636	0.00310669486846551	0.0180005944809882	0.0213516403437187	0.00179621262312571	5.97290970490777e-05	2.00210063923686e-05	0.00249562468791027	0.00934569871017638	0.00563753267705631	2.80790460567338e-07	4.70149906722684e-05	0.000126516627670594	0.00188225982554961	2.11197774832739e-05	0.00132672523879652	0.00156144991431742	0.00633668654610538	0.00295418682670155	0.000727839368089207	0.00136229611063531	0.0276626046110663	0.0194581042497802	0.000974418910943257	0.0108114210060345	0.114877747163825	0.00385360562263099	0.000456985556025521	0.00317569979780893	0.0075706932313268	4.30385121754142e-06	0.00904273973867904	0.00945022165272154	0.0199257190729093
0.000151032683552543	0.00020693315510782	0.000908109915346461	0.000527270425178345	0.00119104015411593	0.00317007667351629	0.00127575300827427	0.00788960480332129	0.000831370105029938	0.00211961766996673	0.00136622916340446	1.28593394223868e-05	0.00271720945756415	0.00182957658738638	0.0058098954085299	0.00729714674895243	0.00854682771475506	0.0178389060662771	0.0131774017788872	0.00126107446780874	0.000744714154808719	0.000917386175191199	9.69390454626822e-05	0.00243051624607651	0.00508719216408095	0.0166567241988161	0.00244928215127617	2.68617962753421e-05	0.000258947572703679	6.67255743740976e-05	3.62027191200601e-06	0.00044293550883941	0.00159794943318952	0.00130900386869403	0.00731685253393176	9.40892602906725e-05	0.000339791470442015	0.000140560861372945	0.00142984805806672	0.000328268308180798	0.0251592948741847	4.50952227898525e-05	9.94909142012738e-05	0.00164728915790303	2.40251125708127e-05	0.00163286730328706	0.00581644340964704	4.28305353528525e-07	0.00512432812782293	0.00638461896233991
0.00148622336662505	0.0300582520163951	0.000910232949884398	0.00316684715522057	0.0054925632592699	0.0250404280139794	0.0211364171642121	0.0111415464921229	0.020293370659904	0.0275824167361493	0.0280621056959088	0.0284303054897294	0.0137367105092523	0.0128624107337492	0.00213718201965843	0.00801968409428824	0.0282467662941125	0.0364237303519626	0.0521987415310528	0.0211166242594387	0.025296815518113	0.000760701850029977	0.00335860397916487	0.0412612845460488	0.0457009743256752	0.00533105917061801	0.003235461664433	0.000484804063926832	0.00903265186210625	0.00414843031818147	0.00120168908343944	0.01441850457143	0.00121201391897057	0.00431310502398168	0.00313948203358917	0.00739915381333498	0.0391422912085924	0.0130338284678309	0.0122568798131	0.000502429465476171	0.00110531987429107	0.000431957245549673	0.000110579958600804	0.000291942932236247	0.0138578764814765	0.000123081430395921	0.0116665801350087	0.016069697573728	0.00140688702363632	0.0651126349851912
0.00207114311770293	0.0178714040653428	1.6727017834386e-05	0.000782666673412589	0.020003106170136	0.000980165975061122	0.00100128468743759	1.96606002075529e-05	0.00146936107127831	0.0180620430246967	0.0394251986015452	0.0175602513383042	0.013805125809969	0.00576706577059774	0.00116914315490261	0.0582253110376673	0.0161712957614314	0.0284043152133189	0.0535868601744047	0.0388111207658398	0.0112468038795173	0.0224392696312926	0.0205998562722007	0.0591843304454692	0.042963195108046	0.0314926529234107	0.00269931688368724	0.0107338501216946	0.0189198215640257	0.0173820504174671	0.0145978981417615	0.00442835355670412	0.00501292434312119	0.0081985095717112	0.0289561550142428	0.0656208767464029	0.0541888206807108	0.0386006674208793	0.0172924278361714	0.0160992767929626	0.111224357911092	0.0308931122458477	0.00163626850361297	0.000374558672964109	0.0156416881365581	0.0097167290901987	0.0386805523025403	0.0426017919577747	0.00722312415643502	0.0301073604211918
0.00102401832440819	0.00973820263119598	3.01281719814702e-05	0.00119318290280705	0.00156593399252466	0.00177154067855125	0.0172945771599297	0.0146839442293544	0.00891237562710397	0.00923583511391618	0.000112945653136494	0.00301942736121477	0.00197050015248001	0.00996347726020996	0.00146652907376967	0.0393130510991767	0.028592485195954	0.0156922949868286	0.00841181028108003	0.000597805364853758	0.00278598568413564	0.00285741012712243	0.00253160350662099	0.0117764879834376	0.00375187091158949	0.0187479686786543	0.000854973354881682	0.00513824937881321	0.0159807487646974	0.00253179040616436	0.000194339273618084	4.49896448985014e-06	0.00300886380033108	0.0034066097691747	0.0368513959578139	0.00363832469374501	0.00337241683267349	0.000283582175679579	0.000503626846914028	0.00285433200015873	0.0371845334009147	0.000662549456463899	0.0326720428918961	0.00673596271124251	0.00813867160391646	0.000480166047385608	0.00341410992050272	0.0106600589397839	0.0243032517535683	0.00151049612973741
0.00199915459061556	0.0081442475845779	2.4615484396603e-05	0.00110218768027871	1.53727976034327e-05	0.0109022450107802	0.0193069076758932	0.0450701823720407	7.02215568509857e-06	0.00333995495685216	0.00233548463406064	0.000574691076960159	0.0104057598777866	0.000217661334724975	5.71203455802134e-05	0.000991907169843534	0.00724481347891959	0.00540194150226199	0.000142173918651449	0.000482254360452336	0.00464185248929526	0.00776003071204758	0.000198948753901909	0.00891893929858146	7.34922726292162e-06	0.00649637704531863	0.0147675581703116	0.000180697848603134	0.0132608713827911	0.0783406779861541	0.0333174282057143	0.00810324208764494	0.0342690773160546	0.0678508126157666	0.00576786920875057	0.00606247545845624	0.000805351461769561	0.00218254603479661	0.019640045451702	0.0023847666352236	0.0098925868213333	0.00325706634693441	0.013579946229355	0.0107173013475143	0.0558891863883608	0.0365178759685002	0.0330049414133611	9.35410692433292e-05	0.025856716289206	6.88939728854466e-11
0.00958331991076193	0.00153956807257687	0.0248257561601583	0.00233193316874184	0.00764756869675538	0.0119764500824631	0.0356233923730201	0.00943012510056687	0.0073828247709404	0.00951558537437481	0.00697174598488027	0.0122678436762776	0.0288615555372659	0.00208744583094471	0.00107571817735657	0.000936196582743696	0.00125290515168899	0.00232173210881858	0.00111708277872271	0.0267447050139015	0.0351795245934318	0.00423359635051381	0.00983904276457517	0.000168496999535388	0.00537808927364731	0.00942321624395744	0.0259213106845298	0.000175238200000111	0.00341195405206932	0.00895544030473554	0.0141916448565002	0.00684143874580083	0.0128631293689141	0.00857224669870204	0.000545867809580777	0.00456920860023106	0.00402948292485429	0.0193408964372648	0.0178530311682259	0.00784907636709557	0.00529915034598891	0.0168038076652895	0.0286177549916348	0.00796140061528169	0.0163221649193008	0.0188532473137818	0.00531212426556659	0.0100983779601533	0.0618195666492869	0.00296829788594738
0.00604867474037883	0.0422256668404682	0.0227006460204019	0.00608108770085257	0.00128330949498145	0.00519330830385995	0.0212129135286796	0.0325154695813868	0.0102182875604675	0.0199892650108661	0.0107592395345778	0.000363731051626569	0.0238072831007072	0.0203809474861112	0.00961580889366413	0.00451719850441296	0.000137958641881853	0.00013544540823307	0.00100758231307866	0.00707016144735089	0.0240567597153399	0.0131106631353837	0.0122444410646111	3.29938038162386e-05	3.8630525885356e-05	0.000429542570069043	0.0523622941028846	0.00840491369329938	0.0294302286034467	0.0106217269315658	0.0117683560649083	0.0122242264484952	0.0382184291152237	0.0291934696920989	0.00613361346458561	0.00250688370471581	0.00214303871988773	0.00409330781171835	0.0298102994926351	0.00988185119502179	0.00714961213575145	0.0283561978723003	0.0238278647892112	0.0246349473144182	0.0510624914619533	0.0368117733808368	0.0106570993385344	0.0205974841242192	0.0343144541611193	7.83637822058815e-05
0.0106058911214437	0.00770029409875448	0.00756960758990846	3.746636116392e-05	0.000747611723085406	0.00112830765117315	0.00371884596975769	0.00177026638198844	8.38651205410673e-05	0.0063881566616975	0.00320963894806052	0.000669264074756857	0.00190047878916002	0.00548674497673532	0.00272248494745616	0.0142161682639676	0.00325201529867666	0.00722807769157012	1.04653869382173e-05	0.00085286234568332	0.0100156394097093	0.00395099579710787	0.00788790303510787	4.00519306640247e-06	0.00159592036301324	0.00244905745173024	0.0196655851731543	0.00567742515753307	0.0179395384440149	0.0126749314472825	0.0306904326514526	0.0320729340667669	0.0190512633285629	0.0149300379265181	0.00982606972071637	0.0184297012501194	0.00776677396022015	0.00762808429220208	0.0154443775254065	0.0168286642175429	0.013137583314152	0.0318178298630881	0.0838144285132187	0.0639189683563364	0.0252516765734634	0.0267774875522574	0.0259113540766473	0.000559288324148805	0.0560623186632413	0.00870841806172421
0.0180510600926215	0.00283314306798281	0.00592356302966439	0.00172609482361653	0.00218577876151932	0.0464123023265732	0.0151460620573601	0.0107750616817816	0.0014866549519659	0.000144490817619879	0.000899682378871568	0.00731125051638055	0.000986338023121141	0.00440755794733523	0.00212513914754045	0.00902254666185626	0.0179590415292956	0.00238932236149704	0.0156523030752398	0.00548365430345262	9.96386893681763e-05	0.00283593890781338	0.0212006539737572	0.0152841667911575	2.67226592436526e-05	0.0309876923401204	0.000324314121082602	0.0151505817360524	0.000828520211648648	0.00111492189959543	0.000454457279358346	0.000377865711653857	0.00047946362205463	0.000397473543427182	0.0241647349263007	9.29929259066736e-06	0.000968112729046264	0.00348024978418227	0.00526809379798552	0.0184010994844927	0.078938910148467	0.00412166037351037	1.9767600572932e-07	0.000159240049798331	0.00247863331513022	0.00310270854492672	0.0106700336837846	0.00495136731162284	5.71561587713979e-05	0.00823820956003101
0.00828390523249877	0.0186283272004706	0.0040840927071392	4.26944977094582e-07	0.00357291782614641	0.00104838742681077	0.00406624613787886	0.01200666470297	0.000735059110145131	0.000724555087919284	5.467880535021e-05	0.0221269378624652	0.00290707274685733	0.003536201387222	0.00948407450092572	1.94018289909063e-06	0.0121756016206474	0.0011265829719994	0.0102380569045312	0.00261605471503479	0.00411718525097764	0.00118695750554254	0.00141589242065463	0.00245286714410664	0.014387460376491	0.0148864210769689	0.000999156875004262	0.00152590243288601	0.00878223533241509	0.0311709431250931	0.0154485025475532	0.0285324083568269	0.0356279709017966	0.00834204972656942	0.00072909815148843	0.0181388920502555	0.0076247262645743	0.00212861580873007	0.0102192794906955	0.00261390028962702	0.0117511242955209	0.0408810148096457	0.00697755674085972	0.00140353610584552	0.0144641797890706	0.004324469188833	0.000927606905439081	0.00162487208272886	0.0294183146261749	0.00245532418280594
6.91963051865776e-06	0.0250565246112977	0.000154340818179243	0.0106448237304344	0.00383401358133135	0.0233670750876647	0.00843165707309037	0.00123708993881798	0.000119687645385982	0.0014167555398958	2.65311865039967e-05	0.00809429174919811	0.000368485497352128	0.0511330775741447	0.0416578431521839	0.00595613895285701	0.0421461118879035	0.00808797001364274	0.0533196078343278	0.00475537503069702	0.00250374082793073	0.0088610792225386	0.00401718435776597	0.0059300051638942	0.00537139202966982	0.00494335396813721	0.0147832191084967	0.00134563073814893	2.05523686747064e-06	0.0208727361583776	0.0108491727838665	0.0162225282646279	0.00162069997205479	0.000443227172123917	4.94395748989641e-05	0.00730719081226327	0.00249195192891932	0.000305604988051315	3.29550383411603e-08	0.00126078077513938	0.003354305415272	0.0113749795205443	0.0401377249903734	0.0127695705969807	0.0124006735464871	0.00115932902233915	0.0032228485232056	0.00310883952184843	0.0151242280982051	0.000406065056201219
0.00868966774167969	7.07772522554144e-05	0.00132778435698008	0.000729312942415985	0.00196532450007381	0.0295057559913833	0.00545788198122931	0.0060075685843901	0.00376741072518713	0.000460334278291487	0.00398066793233247	0.000246621117365663	0.00229224378306726	0.0354783261589573	0.026160966467708	0.0105626790742941	0.0373165031625387	0.0125505566088595	0.00650963410369827	0.000812664907450764	0.020721291681036	0.00939962357423792	0.00274971306133869	0.0140770020463973	0.0215645315974332	0.00308681948019741	0.0396526093925407	0.00264946619646843	0.0504318823859494	0.0653780767513479	0.0706920063221395	0.0749826660113701	0.0362928832570322	0.0617033254489519	0.0692883049076045	0.0260792369675584	0.00464379458838335	0.00302794407001231	0.0997886971239282	0.0257267587126064	0.0138444139076799	0.0384949976756793	0.0341286717019697	0.0210888127073693	0.0181828959979015	0.0672106259101518	0.0333948589743695	0.0116782594976487	0.0965009591795376	0.00229036607877794
0.00105554095634435	0.00408557537217293	0.000271655996566893	0.00152379919607188	0.000394865879015255	0.0127588670202565	0.00193401154516858	0.000169724586440234	0.00462619781026359	0.00654660717701427	0.00961569698193336	1.39156702878421e-06	0.00280774582416021	0.089549758404011	0.0238883980421166	0.0570545724944019	0.105527735899503	0.0405088307819774	0.00507163098116074	0.0170912156524694	0.0165652530477907	0.0154817972026907	3.29742231152889e-06	0.066442442561487	0.036804907564852	0.00057344121894119	0.0737247936466381	0.0116875600610219	0.127539369984228	0.123524885250728	0.113481465253228	0.152090207581831	0.0779843246009755	0.107417820393961	0.114782284672431	0.0277957765474674	0.00418812310610353	0.00675547240062365	0.130520367916482	0.0359513008355801	0.016635639621796	0.0316982175724939	0.0167545900436477	0.0144362860297558	0.026997056545746	0.105911231855838	0.0895897031456565	0.00892888496080715	0.131822681533449	0.0232375279047692
0.0531460577023138	0.0619832873201955	0.0945026491374726	0.0626776576561599	0.0271094898266263	0.0332441524644412	0.0107439147547569	0.00478205209744678	0.0191360060466337	0.0617816356535121	0.0691783269408691	0.0552985876438248	0.0478265670120502	0.00473050994182588	7.46257708729253e-05	0.0337690380676471	0.000283956679354632	0.00529681993259065	3.48332976608838e-05	0.0247556791605152	0.000861531087548697	0.000641625747876106	0.0460781616219233	0.00891140446015119	0.00227732096668261	0.028258418083494	0.000111557382229087	0.0254593408620911	0.0135080470625283	0.0047330478982294	0.00338773073818957	0.001238050904598	0.00127297078759025	0.000874543911349643	0.0145874701362464	0.0321506434021918	0.0335611027806091	0.0262415739695177	0.00334999523879326	0.0328115068138258	0.0107594258490377	0.0331217406966495	0.0199593892728473	0.0729990994341516	0.00102151860283685	0.0006256860325307	0.00565613388087606	0.00699789773322851	8.05554188949776e-06	0.0677796605439679
0.0109467312370282	0.00422619587158423	0.0330211783156125	0.0670412054232178	0.00284528099922118	0.00110326517714259	0.000808840791320399	0.00058012269978431	0.00575606840047124	0.000653037050059764	4.5919085239885e-06	0.00798183981815894	0.0138604146542276	0.0618182561066031	0.0189716492579592	0.00335946030602445	0.02385677238547	0.000108011559276506	0.0185952133302775	0.000927645690071622	0.007535855495436	1.01269945723007e-06	0.00346307931431144	0.0195744042178074	0.0108342126513706	0.00147970420195424	0.0520613093597367	0.00054968006299585	0.0165707927957263	0.0134525414643906	0.0100842911366615	0.0605557260255362	0.0512547476724836	0.0531973211829185	0.0192276386791427	0.000249480726079899	0.00131770133533938	0.000637825349036964	0.0425095581253272	0.00273101913533466	1.22108498362516e-06	0.00273825293336184	0.00034492350946224	0.00501112933187306	0.0058499402222137	0.0842189635234094	0.00978720917470291	0.0168515442875883	0.0480353599442802	0.00271484086228878
0.0131560649775995	0.0019071868397621	0.0321438055910204	0.0102065369950604	0.0404833390945278	0.0200658974244775	0.044904729816192	0.021159829950288	0.00681511754489638	0.00614562653376229	0.0290583531010967	0.0287525797393695	0.0308522625173366	0.00169899415473442	0.00555603491861409	0.00415101633767902	0.0116298968756454	0.00783492188180513	0.054769676635592	0.0849189236716608	0.00819916040121838	0.020533308036268	0.0232877736094386	0.0445615404749059	0.0465176886739106	0.0450239402433275	0.00227141875075954	0.00450155967512202	0.000100522831041393	0.0326904775745745	0.0189816781057992	0.0263162928933566	0.00360299291617956	0.00104974074339264	0.0343094306312978	0.0132825115282865	0.0721008428965217	0.0392686051277369	0.00723611228813251	0.0216698075688857	0.0638602935255116	0.0217273551798097	0.0241267089693124	0.0125825576693616	0.0176876194768475	0.0208836457641334	0.0322171590187024	0.0260474963222725	0.0109304180865374	0.0251274838535636
0.029343461297021	0.000176255375790179	0.0895321639314509	0.0520198128298075	0.0317518774079144	0.0146549529873474	0.0231524097199985	0.0437588979350821	0.0182335606090376	0.034600089243612	0.0304653437291899	0.0853663611282848	0.0767823719413024	0.000684317744843428	0.00122581867411723	0.0503166861834572	4.97881772068065e-05	0.00627718403714035	8.61058068939248e-05	0.030604633988531	3.78964098437898e-06	0.0234969975645806	0.0888206475922482	0.00232821159986869	0.0246205916338495	0.03890454337218	0.000361314068442803	0.0190355013976115	0.00430750301467455	0.00431034168132893	0.00241338641713305	9.82436850961586e-05	0.00789604028157171	0.00672184179650506	0.012296312709264	0.0243733598345899	0.0170926671270415	0.0128488109456363	0.0125877517270858	0.0231687115459974	0.013437620800569	0.0144853699090486	0.0277218961924876	0.0189959964286057	0.00114941228301694	0.00550426037956674	0.00943072491063161	0.00175560345620291	0.0033467600947977	0.0376755695500393
[truncated: 193 more columns]
